# Supplementary material for: AlBr3-Promoted stereoselective anti-hydroarylation of the acetylene bond in 3-arylpropynenitriles by electron-rich arenes: synthesis of 3,3-diarylpropenenitriles
Source: publisher site journal article supplement (doi:10.3762/bjoc.17.180), 2021-11-01
Supplement: Additional file 1 [file 1860-5397-17-180-S1.pdf]

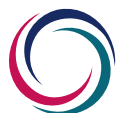

## Supporting Information

for

### **AlBr<sub>3</sub>-Promoted stereoselective *anti*-hydroarylation of the acetylene bond in 3-arylpropenenitriles by electron-rich arenes: synthesis of 3,3-diarylpropenenitriles**

Yelizaveta Gorbunova, Dmitry S. Ryabukhin and Aleksander V. Vasilyev

*Beilstein J. Org. Chem.* **2021**, *17*, 2663–2667. doi:10.3762/bjoc.17.180

### **Experimental procedures, compound characterization, and <sup>1</sup>H and <sup>13</sup>C NMR spectra of compounds**

## Table of contents

|                                                                                                                                                 |     |
|-------------------------------------------------------------------------------------------------------------------------------------------------|-----|
| 1. General remarks .....                                                                                                                        | S1  |
| 2. Synthesis and characterization of starting compounds, 3-arylpropynenitriles <b>1a–c</b> .....                                                | S1  |
| 3. Synthesis and characterization of <i>E,Z</i> -3,3-diarylpropenenitriles <b>2a–o</b> and<br>3-aryllindenones <b>3a, b</b> .....               | S2  |
| 4. References .....                                                                                                                             | S9  |
| 5. <sup>1</sup> H and <sup>13</sup> C NMR spectra, DEPT-135, COSY, NOESY spectra<br>of compounds <b>1a–c</b> , <b>2a–o</b> , <b>3a, b</b> ..... | S11 |

**1. General remarks.** NMR spectra of solutions of compounds in CDCl<sub>3</sub> were recorded on a Bruker AVANCE III 400 spectrometer at 25 °C (at 400 and 100 MHz for <sup>1</sup>H and <sup>13</sup>C NMR spectra, respectively). The residual proton solvent peak CDCl<sub>3</sub> (δ 7.26 ppm) for <sup>1</sup>H NMR spectra and the carbon signal of CDCl<sub>3</sub> (δ 77.0 ppm) for <sup>13</sup>C NMR spectra were used as references. HRMS was carried out using a Bruker maXis HRMS-ESI-QTOF instruments. Chromato-mass-spectrometry was performed with a Shimadzu QP-2010 Ultra with a SPB-1 SULFUR capillary column (30 m × 0.32 mm), thickness of the stationary phase 1.25 μm. The preparative reactions were monitored by thin-layer chromatography carried out on silica gel plates (Alugram SIL G/UV-254), using UV light for detection. Preparative TLC was performed on silica gel Chemapol L 5/40 with petroleum ether elution. IR spectra were registered for solutions of compounds in CHCl<sub>3</sub> or for KBr disks on a Bruker IR spectrometer.

## 2. Synthesis and characterization of starting compounds 3-arylpropynenitriles **1a–c**.

Synthesis of 3-arylpropynenitriles **1a–c** was carried out from the corresponding 3-arylpropynoic acids or their potassium salts, which were converted into acyl chlorides and then to amides; dehydration of the latter gave the target compounds (Scheme S1).

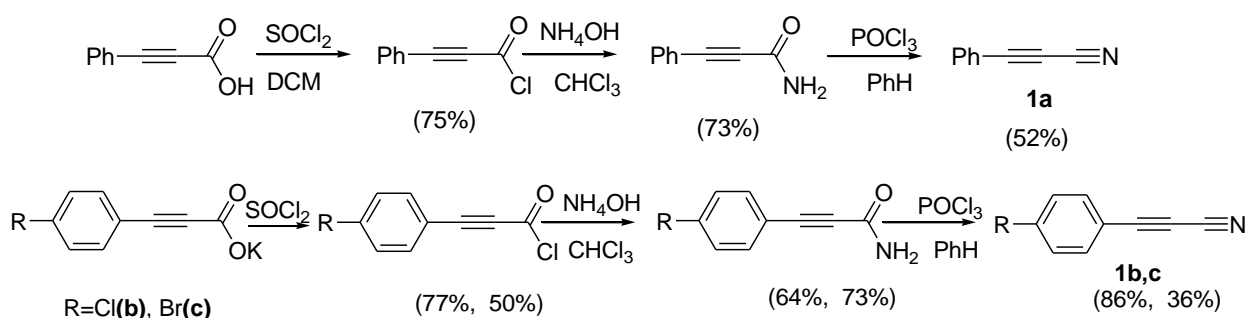

Scheme S1. Synthesis of 3-arylpropynenitriles **1a–c**.

### General procedure for dehydration of 3-arylpropynamides. Synthesis of nitriles 1a–c.

Phosphorus oxychloride ( $\text{POCl}_3$ , 4 mL) was added to a solution of 3-arylpropynamide (6 mol) in 60 mL of benzene. The reaction mixture was refluxed for 4 h. Then, it was diluted with 100 mL of dichloromethane, 100 mL of an aqueous saturated aqueous solution of  $\text{NaHCO}_3$  were added, and this heterogeneous mixture was magnetically stirred at room temperature for 3–5 hours. The organic layer was separated, washed with water (100 mL), and dried with  $\text{Na}_2\text{SO}_4$ . The solvent was removed under reduced pressure. The nitriles **1b**, **c** were isolated by flash chromatography on silica gel, using a mixture of hexane/ethyl acetate 10:1 (v/v). Nitrile **1a** was used without additional purification.

**3-Phenylpropynenitrile 1a** [1], yield of 52%, orange oil:

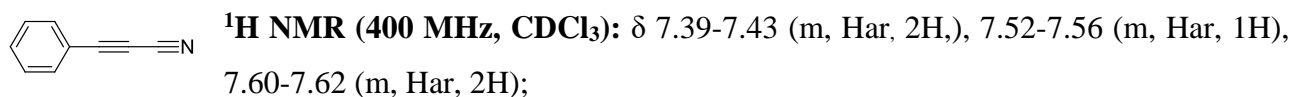

$^{13}\text{C NMR}$  (100 MHz,  $\text{CDCl}_3$ ):  $\delta$  63.2(C), 83.1(C), 105.6( $\text{C}\equiv\text{N}$ ), 117.7 (Car), 129.0(CarH), 132.0(CarH), 133.6(CarH).

**3-(4-Chlorophenyl)propynenitrile 1b**[1], yield of 86%, yellow solid, m.p. 88-91°C:

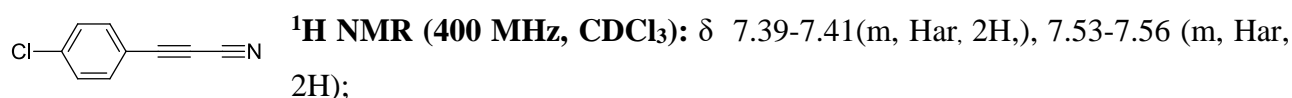

$^{13}\text{C NMR}$  (100 MHz,  $\text{CDCl}_3$ ):  $\delta$  64.1(C), 81.8(C), 105.4( $\text{C}\equiv\text{N}$ ), 116.1(Car), 129.5(CarH), 134.8(CarH), 138.7(Car).

**3-(4-Bromophenyl)propynenitrile 1c** [1], yield of 36%, orange oil:

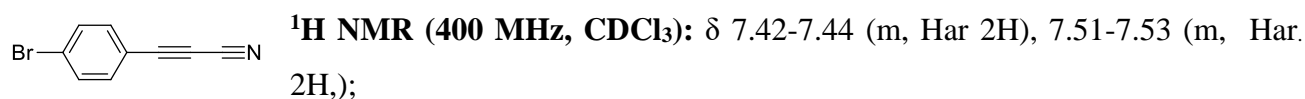

$^{13}\text{C NMR}$  (100 MHz,  $\text{CDCl}_3$ ):  $\delta$  64.0(C), 81.8(C), 105.2( $\text{C}\equiv\text{N}$ ), 116.2(Car), 126.9(Car), 132.2(CarH), 134.6(CarH).

### **3. Synthesis and characterization of *E,Z*-3,3-diarylpropenenitriles 2a–o and 3-arylindenones 3a, b.**

**General procedure for the reaction of 3-arylpropynenitriles 1 with arenes under the action of AlBr<sub>3</sub>. Synthesis of 3,3-diarylpropenenitriles 2.** 3-Arylpropynenitrile **1** (0.64 mmol) was added to a mixture of AlBr<sub>3</sub> (1.07 g, 4 mmol, 6 equiv) with arene (2.5 mL). The reaction mixture was magnetically stirred at room temperature for 2 h. Then, the reaction was quenched with water (100 mL). The reaction products were extracted into EtOAc (3 × 100 mL), the combined extracts were washed with water (2 × 60 mL), saturated aqueous solution of NaHCO<sub>3</sub> (100 mL), water again (2 × 60 mL), and dried with Na<sub>2</sub>SO<sub>4</sub>. After evaporation of the solvent under reduced pressure, the obtained residue was subjected to thin-layer chromatography on silica gel using mixture of petroleum ether/ethyl acetate 10:1 (v/v) or a mixture of petroleum ether/dichloromethane/diethyl ether 20:5:1 (v/v/v). Yields of the products were determined after chromatographic isolation.

**General procedure for the reaction of 3-arylpropynenitrile 1 with benzene in TfOH. Synthesis of 3,3-diarylpropenenitriles 2.** 3-Arylpropynenitrile **1** (0.78 mmol) was added to a mixture of benzene (1 mL) in TfOH (2 mL). The reaction mixture was magnetically stirred at 0 °C or at room temperature for 1 h. Then, the reaction was quenched with water (100 mL). The reaction products were extracted into EtOAc (3 × 100 mL), the combined extracts were washed with water (2 × 60 mL), saturated aqueous solution of NaHCO<sub>3</sub> (100 mL), water again (2 × 60 mL), and dried with Na<sub>2</sub>SO<sub>4</sub>. After evaporation of the solvent under reduced pressure, the obtained residue was subjected to thin-layer chromatography on silica gel using a mixture of petroleum ether/ethyl acetate 10:1 (v/vol). Yields of the products were determined after chromatographic isolation.

**General procedure for the cyclization of 3,3-diarylpropenenitriles 2 in TfOH. Synthesis of 3-arylindenones 3a, b.** Solution of 3,3-diarylpropenenitrile **2** (0.4 mmol) in TfOH (2 mL) was magnetically stirred at room temperature for 1 h. Then the reaction was quenched with water (100 mL) and the reaction products were extracted into EtOAc (3 × 100 mL), the combined extracts were washed with water (2 × 60 mL), saturated aqueous solution of NaHCO<sub>3</sub> (100 mL), water again (2 × 60 mL), and dried with Na<sub>2</sub>SO<sub>4</sub>. After evaporation of the solvent under reduced pressure, the obtained residue was subjected to thin-layer chromatography on silica gel using a mixture of petroleum ether/ethyl acetate 10:1 (v/v). Yields of the products were determined after chromatographic isolation.

**3,3-Diphenylprop-2-enitrile 2a** [2], obtained from nitrile **1a** and benzene with AlBr<sub>3</sub> in yield of 34%, or from nitrile **1a** and benzene in TfOH in yield of 31%, slightly yellow oil:

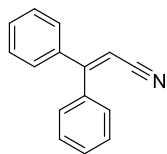

**<sup>1</sup>H NMR (400 MHz, CDCl<sub>3</sub>):** δ 5.74 (s, 1H, -CH=), 7.29-7.31 (m, 2H, Har), 7.38 (t, 2H, Har, *J* = 8.0 Hz), 7.43-7.47 (m, 6H, Har);

**<sup>13</sup>C NMR (100 MHz, CDCl<sub>3</sub>):** δ 95.0(-CH=), 118.0(C≡N), 128.6(CarH), 128.7(CarH), 128.8(CarH), 129.7(CarH), 130.1(CarH), 130.5(CarH), 137.2(Car), 139.0(Car), 163.3 (C);

**IR (KBr), ν, cm<sup>-1</sup>:** 2213 (C≡N);

**HRMS, *m/z*:** calcd. C<sub>15</sub>H<sub>11</sub>N<sup>+</sup> [M+Na]<sup>+</sup> 228.0784, found 228.0789.

**(E-) and (Z)-3-(4-Chlorophenyl)-3-(phenyl)- prop-2-enitrile 2b** [2] obtained from nitrile **1b** and benzene with AlBr<sub>3</sub> in yield of 25%, or from nitrile **1b** and benzene in TfOH in yield of 55%, slightly yellow oil:

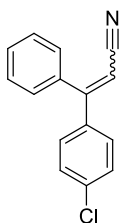

**<sup>1</sup>H NMR (400 MHz, CDCl<sub>3</sub>):** mixture of (E-) and (Z)-isomers, δ 5.72 (s, 1H, -CH=), 5.74 (s, 1H, -CH=), 7.24 (d, 2H, Har, *J* = 8.8 Hz), 7.28 (d, 2H, Har, *J* = 7.2 Hz), 7.34-7.47 (m, 14H, Har);

**<sup>13</sup>C NMR (100 MHz, CDCl<sub>3</sub>):** mixture of (E-) and (Z)-isomers, δ 95.4 (2-CH=), 117.7(2 C≡N), 128.5(CarH), 128.8(CarH), 128.9(CarH), 129.0(CarH), 129.1(CarH), 129.6(CarH), 129.9(CarH), 130.4(CarH), 130.8(CarH), 131.1(CarH), 135.6(Car), 136.4(Car), 136.7(Car), 136.8(Car), 137.5(Car), 138.6(Car), 162.0 (2C);

**HRMS, *m/z*:** calcd. C<sub>15</sub>H<sub>10</sub>ClNNa<sup>+</sup> [M+Na]<sup>+</sup> 262.0394, found 262.0394.

**(Z)-3-(2,5-Dimethylphenyl)-3-phenylprop-2-enitrile 2c** obtained from nitrile **1a** and 1,4-dimethylbenzene with AlBr<sub>3</sub> in yield of 30%, slightly yellow oil:

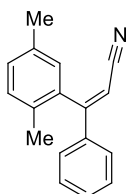

**<sup>1</sup>H NMR (400 MHz, CDCl<sub>3</sub>):** δ 2.06 (s, 3H, CH<sub>3</sub>), 2.36 (s, 3H, CH<sub>3</sub>), 5.96 (s, 1H, -CH=), 7.04 (s, 1H, Har), 7.17 (s, 2H, Har), 7.29 (d, 2H, Har, *J* = 6.8 Hz), 7.36 (t, 2H, Har, *J* = 6.8 Hz), 7.39-7.43 (m, 1H, Har);

**<sup>13</sup>C NMR (100 MHz, CDCl<sub>3</sub>):** δ 19.2(CH<sub>3</sub>), 21.0(CH<sub>3</sub>), 96.2(-CH=), 117.2(C≡N), 127.3(CarH), 129.0(CarH), 129.7(CarH), 130.2(CarH), 130.6(CarH), 130.7(CarH), 132.7(Car), 135.7(Car), 136.6(Car), 137.6(Car), 136.8(Car), 163.3(C);

**IR (KBr), ν, cm<sup>-1</sup>:** 2215 (C≡N);

**HRMS, *m/z*:** calcd. C<sub>17</sub>H<sub>15</sub>NNa<sup>+</sup> [M+Na]<sup>+</sup> 256.1097, found 256.1102

**(Z)-3-(2,5-Dimethylphenyl)-3-(4-chlorophenyl)prop-2-enenitrile 2d** obtained from nitrile **1b** and

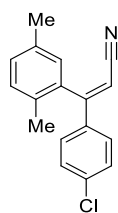

1,4-dimethylbenzene with  $\text{AlBr}_3$  in yield of 35%, slightly yellow oil:

**$^1\text{H}$  NMR (400 MHz,  $\text{CDCl}_3$ ):**  $\delta$  2.04 (s, 3H,  $\text{CH}_3$ ), 2.36 (s, 3H,  $\text{CH}_3$ ), 5.94 (s, 1H, -CH=), 7.01 (s, 1H, Har), 7.17 (s, 2H, Har), 7.21 (d, 2H, Har,  $J = 8.6$  Hz), 7.32 (d, 2H, Har,  $J = 8.6$  Hz);

**$^{13}\text{C}$  NMR (100 MHz,  $\text{CDCl}_3$ ):**  $\delta$ : 19.2( $\text{CH}_3$ ), 21.0( $\text{CH}_3$ ), 96.6(-CH=), 117.2( $\text{C}\equiv\text{N}$ ), 128.5(CarH), 129.3(CarH), 129.7(CarH), 130.4(CarH), 130.9(CarH), 132.7(Car), 135.9(Car), 136.1(Car), 136.2(Car), 136.8(Car), 162.0(C);

**IR (KBr),  $\nu$ ,  $\text{cm}^{-1}$ :** 2216 ( $\text{C}\equiv\text{N}$ );

**HRMS,  $m/z$ :** calcd.  $\text{C}_{17}\text{H}_{14}\text{ClNNa}^+ [\text{M}+\text{Na}]^+$  290.0707, found 290.0704.

**(Z)-3-(4-Bromophenyl)-3-(2,5-dimethylphenyl)prop-2-enenitrile 2e** obtained from nitrile **1c** and

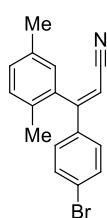

1,4-dimethylbenzene with  $\text{AlBr}_3$  in yield of 40%, slightly yellow oil:

**$^1\text{H}$  NMR (400 MHz,  $\text{CDCl}_3$ ):**  $\delta$  2.04 (s, 3H,  $\text{CH}_3$ ), 2.35 (s, 3H,  $\text{CH}_3$ ), 5.94 (s, 1H, -CH=), 7.00 (s, 1H, Har), 7.14 (d, 2H, Har,  $J = 8.6$  Hz), 7.16 (s, 2H, Har), 7.48 (d, 2H, Har,  $J = 8.6$  Hz);

**$^{13}\text{C}$  NMR (100 MHz,  $\text{CDCl}_3$ ):**  $\delta$  19.2( $\text{CH}_3$ ), 21.0( $\text{CH}_3$ ), 96.7(-CH=), 117.2( $\text{C}\equiv\text{N}$ ), 125.2(Car), 128.8(CarH), 129.7(CarH), 130.5(CarH), 130.9(CarH), 132.3(CarH), 132.7(Car), 135.9(Car), 136.1(Car), 136.5(Car), 162.1(C);

**IR (KBr),  $\nu$ ,  $\text{cm}^{-1}$ :** 2216 ( $\text{C}\equiv\text{N}$ );

**HRMS,  $m/z$ :** calcd.  $\text{C}_{17}\text{H}_{14}\text{BrNNa}^+ [\text{M}+\text{Na}]^+$  334.0202, found 334.0192.

**(Z)-3-(2,4,5-Trimethylphenyl)-3-phenylprop-2-enenitrile 2f** obtained from nitrile **1a** and 1,2,4-

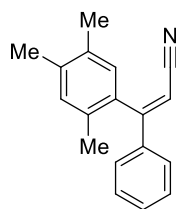

trimethylbenzene with  $\text{AlBr}_3$  in yield of 26%, slightly yellow oil:

**$^1\text{H}$  NMR (400 MHz,  $\text{CDCl}_3$ ):**  $\delta$  2.03 (s, 3H,  $\text{CH}_3$ ), 2.26 (s, 3H,  $\text{CH}_3$ ), 2.28 (s, 3H,  $\text{CH}_3$ ), 5.93 (s, 1H, -CH=), 6.98 (s, 1H, Har), 7.05 (s, 1H, Har), 7.28-7.40 (m, 5H, Har);

**$^{13}\text{C}$  NMR (100 MHz,  $\text{CDCl}_3$ ):**  $\delta$  19.2( $\text{CH}_3$ ), 19.3( $\text{CH}_3$ ), 19.7( $\text{CH}_3$ ), 96.1(-CH=), 117.8( $\text{C}\equiv\text{N}$ ), 127.3(CarH), 128.9(CarH), 130.3(CarH), 130.5(CarH), 132.2(CarH), 133.1(Car), 134.2(Car), 134.3(Car), 137.9(Car), 138.0(Car), 163.4(C);

**IR (KBr),  $\nu$ ,  $\text{cm}^{-1}$ :** 2214 ( $\text{C}\equiv\text{N}$ );

**HRMS,  $m/z$ :** calcd.  $\text{C}_{18}\text{H}_{17}\text{NNa}^+ [\text{M}+\text{Na}]^+$  270.1253, found 270.1256.

**(Z)-3-(4-Chlorophenyl)-3-(2,4,5-trimethylphenyl)prop-2-enenitrile 2g** obtained from nitrile **1b**

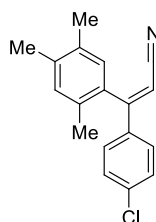

and 1,2,4-trimethylbenzene with  $\text{AlBr}_3$  in yield of 38%, slightly yellow oil:

**$^1\text{H}$  NMR (400 MHz,  $\text{CDCl}_3$ ):**  $\delta$  2.01 (s, 3H,  $\text{CH}_3$ ), 2.26 (s, 3H,  $\text{CH}_3$ ), 2.28 (s, 3H,  $\text{CH}_3$ ), 5.90 (s, 1H,  $-\text{CH}=\text{C}$ ), 6.96 (s, 1H, Har), 7.05 (s, 1H, Har), 7.22 (d, 2H, Har,  $J = 8.4$  Hz), 7.32 (d, 2H, Har,  $J = 8.8$  Hz);

**$^{13}\text{C}$  NMR (100 MHz,  $\text{CDCl}_3$ ):**  $\delta$  19.2( $\text{CH}_3$ ), 19.3( $\text{CH}_3$ ), 19.7( $\text{CH}_3$ ), 96.5( $-\text{CH}=\text{C}$ ), 117.4( $\text{C}\equiv\text{N}$ ), 128.6(CarH), 129.2(CarH), 130.3(CarH), 132.3(CarH), 133.0(Car), 133.7(Car), 134.4(Car), 136.4(Car), 136.7(Car), 138.2(Car), 162.1(C);

**HRMS,  $m/z$ :** calcd.  $\text{C}_{18}\text{H}_{16}\text{ClNNa}^+ [\text{M}+\text{Na}]^+$  304.0863, found 304.0864.

**(Z)-3-(4-Bromophenyl)-3-(2,4,5-trimethylphenyl)prop-2-enenitrile 2h** obtained from nitrile **1c**

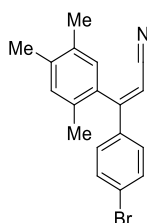

and 1,2,4-trimethylbenzene with  $\text{AlBr}_3$  in yield of 25%, slightly yellow oil:

**$^1\text{H}$  NMR (400 MHz,  $\text{CDCl}_3$ ):**  $\delta$  2.01 (s, 3H,  $\text{CH}_3$ ), 2.25 (s, 3H,  $\text{CH}_3$ ), 2.28 (s, 3H,  $\text{CH}_3$ ), 5.91 (s, 1H,  $-\text{CH}=\text{C}$ ), 6.95 (s, 1H, Har), 7.04 (s, 1H, Har), 7.15 (d, 2H, Har,  $J = 8.4$  Hz), 7.47 (d, 2H, Har,  $J = 8.4$  Hz);

**$^{13}\text{C}$  NMR (100 MHz,  $\text{CDCl}_3$ ):**  $\delta$  19.2( $\text{CH}_3$ ), 19.4( $\text{CH}_3$ ), 19.7( $\text{CH}_3$ ), 96.6( $-\text{CH}=\text{C}$ ), 117.4( $\text{C}\equiv\text{N}$ ), 125.1(Car), 128.8(CarH), 130.3(CarH), 132.2(CarH), 132.3(CarH), 133.1(Car), 133.6(Car), 134.5(Car), 136.9(Car), 138.2(Car), 162.2(C);

**IR (KBr),  $\nu$ ,  $\text{cm}^{-1}$ :** 2215 ( $\text{C}\equiv\text{N}$ );

**HRMS,  $m/z$ :** calcd.  $\text{C}_{18}\text{H}_{16}\text{BrNNa}^+ [\text{M}+\text{Na}]^+$  348.0358, found 348.0359.

**(Z)-3-(2,4-Dimethylphenyl)-3-phenylprop-2-enenitrile 2i** obtained from nitrile **1a** and 1,3-

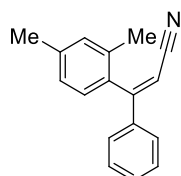

dimethylbenzene with  $\text{AlBr}_3$  in yield of 42%; slightly yellow oil:

**$^1\text{H}$  NMR (400 MHz,  $\text{CDCl}_3$ ):**  $\delta$  2.04 (s, 3H,  $\text{CH}_3$ ), 2.37 (s, 3H,  $\text{CH}_3$ ), 5.94 (s, 1H,  $-\text{CH}=\text{C}$ ), 7.09-7.12 (m, 3H, Har), 7.28d (d, 2H, Har,  $J=7.2$  Hz), 7.32-7.36 (m, 2H, Har), 7.38-7.42 (m, 1H, Har);

**$^{13}\text{C}$  NMR (100 MHz,  $\text{CDCl}_3$ ):**  $\delta$  19.7( $\text{CH}_3$ ), 21.4( $\text{CH}_3$ ), 96.3( $-\text{CH}=\text{C}$ ), 117.7( $\text{C}\equiv\text{N}$ ), 126.9 (CarH), 127.3(CarH), 128.9(CarH), 129.3(CarH), 130.6(CarH), 131.7(CarH), 133.9(Car), 135.8(Car), 137.9(Car), 139.4(Car), 163.4(C);

**IR (KBr),  $\nu$ ,  $\text{cm}^{-1}$ :** 2215 ( $\text{C}\equiv\text{N}$ );

**HRMS,  $m/z$ :** calcd.  $\text{C}_{17}\text{H}_{15}\text{NNa}^+ [\text{M}+\text{Na}]^+$  256.1097, found 256.1099.

**(Z)-3-(4-Bromophenyl)-3-(2,4-dimethylphenyl)prop-2-enitrile 2j** obtained from nitrile **1c** and 1,3-dimethylbenzene with AlBr<sub>3</sub> in yield of 33%, slightly yellow oil:

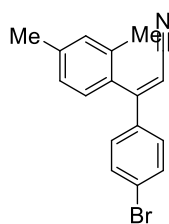

**<sup>1</sup>H NMR (400 MHz, CDCl<sub>3</sub>):** δ 2.03 (s, 3H, CH<sub>3</sub>), 2.37 (s, 3H, CH<sub>3</sub>), 5.93 (s, 1H, -CH=), 7.09-7.12 (m, 3H, Har), 7.14 (d, 2H, Har, *J* = 8.8 Hz), 7.48 (d, 2H, Har, *J* = 8.4 Hz);

**<sup>13</sup>C NMR (100 MHz, CDCl<sub>3</sub>):** δ 19.7(CH<sub>3</sub>), 21.4(CH<sub>3</sub>), 96.8(-CH=), 117.4(C≡N), 125.2(Car), 127.1(CarH), 128.7(CarH), 129.3(CarH), 131.8(CarH), 132.2(Car), 133.4(Car), 135.8(Car), 136.8(Car), 139.7(Car), 162.2(C);

**HRMS, *m/z*:** calcd. C<sub>17</sub>H<sub>14</sub>BrNNa<sup>+</sup> [M+Na]<sup>+</sup> 334.0202, found 334.0200.

**(Z)-3-(4-Chlorophenyl)-3-(2,4-dimethylphenyl)prop-2-enitrile 2k** obtained from nitrile **1b** and 1,3-dimethylbenzene with AlBr<sub>3</sub> in yield of 64%, slightly yellow oil:

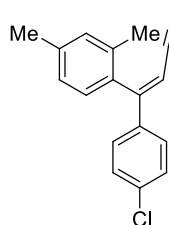

**<sup>1</sup>H NMR (400 MHz, CDCl<sub>3</sub>):** δ 2.03 (s, 3H, CH<sub>3</sub>), 2.37 (s, 3H, CH<sub>3</sub>), 5.92 (s, 1H, -CH=), 7.01-7.09 (m, 3H, Har), 7.21 (d, 2H, Har, *J* = 8.6 Hz), 7.32 (m, 2H, Har, *J* = 8.6 Hz);

**<sup>13</sup>C NMR (100 MHz, CDCl<sub>3</sub>):** δ 19.7(CH<sub>3</sub>), 21.4(CH<sub>3</sub>), 96.7(-CH=), 117.4(C≡N), 127.1 (CarH), 128.6(CarH), 129.2(CarH), 129.3(CarH), 131.8(CarH), 133.4(Car), 135.8(Car), 136.3(Car), 136.8(Car), 139.7(Car), 162.1(C);

**IR (KBr), ν, cm<sup>-1</sup>:** 2216 (C≡N);

**HRMS, *m/z*:** calcd. C<sub>17</sub>H<sub>14</sub>ClNNa<sup>+</sup> [M+Na]<sup>+</sup> 290.0707, found 290.0735.

**(E)- and (Z)-3-(4-Chlorophenyl)-3-(3,4-dimethylphenyl)prop-2-enitrile 2l** obtained from nitrile **1b** and 1,2-dimethylbenzene with AlBr<sub>3</sub> in yield of 20%, slightly yellow oil:

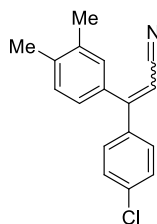

**<sup>1</sup>H NMR (400 MHz, CDCl<sub>3</sub>):** mixture of (E-) and (Z)-isomers, δ 2.25 (s, 3H, CH<sub>3</sub>), 2.28 (c 3H, CH<sub>3</sub>), 2.29 (s, 3H, CH<sub>3</sub>), 2.32 (s, 3H, CH<sub>3</sub>), 5.63 (s, 1H, -CH=), 5.70 (c 1H, -CH=), 6.98-7.00 (m, 1H, Har), 7.03 (s, 1H, Har), 7.12-7.17 (m, 3H, Har), 7.20-7.22 (m, 1H, Har), 7.24 (d, 2H, Har, *J* = 7.2 Hz), 7.34 (d, 2H, Har, *J* = 7.2 Hz), 7.37 (d, 2H, Har, *J* = 6.8 Hz), 7.42 (d, 2H, Har, *J* = 7.2 Hz);

**<sup>13</sup>C NMR (100 MHz, CDCl<sub>3</sub>):** δ 19.8(CH<sub>3</sub>), 19.9(CH<sub>3</sub>), 94.3(-CH=), 94.6(-CH=), 118.0(2C≡N), 126.1(CarH), 127.2(CarH), 128.9(CarH), 129.0(CarH), 129.6(CarH), 129.9(CarH), 130.0(CarH), 130.1(CarH), 130.6(CarH), 131.0(CarH), 134.3(Car), 135.8(Car), 136.1(Car), 136.2(Car), 136.6(Car), 137.1(Car), 137.3(Car), 137.9(Car), 139.4(Car), 140.0(Car), 162.2(2C);

**HRMS, *m/z*:** calcd. C<sub>17</sub>H<sub>14</sub>ClNNa<sup>+</sup> [M+Na]<sup>+</sup> 290.0707, found 290.0704.



**(Z)-3-(4-Bromophenyl)-3-(2,3-dimethylphenyl)prop-2-enenitrile 2m** obtained from nitrile **1c** and 1,2-dimethylbenzene with  $\text{AlBr}_3$  in yield of 20%, slightly yellow oil:

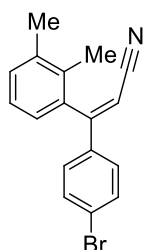

**$^1\text{H}$  NMR (400 MHz,  $\text{CDCl}_3$ ):**  $\delta$  1.99 (s, 3H,  $\text{CH}_3$ ), 2.31 (s, 3H,  $\text{CH}_3$ ), 5.97 (s, 1H,  $-\text{CH}=\text{N}$ ), 7.04 (d, 1H, Har,  $J = 6.0$  Hz), 7.14 (m, 2H, Har, 7.2 Hz), 7.20 (t, 1H, Har,  $J = 6.4$  Hz), 7.25 (d, 1H, Har,  $J = 6.0$  Hz), 7.48 (d, 2H, Har,  $J = 6.8$  Hz);

**$^{13}\text{C}$  NMR (100 MHz,  $\text{CDCl}_3$ ):**  $\delta$  16.7( $\text{CH}_3$ ), 20.5( $\text{CH}_3$ ), 96.8( $-\text{CH}=\text{N}$ ), 117.3( $\text{C}\equiv\text{N}$ ), 125.2(Car), 126.1(CarH), 127.0(CarH), 128.7(CarH), 131.2(CarH), 132.3(CarH), 134.4(Car), 136.4(Car), 136.7(Car), 138.0(Car), 162.6(C);

**HRMS,  $m/z$ :** calcd.  $\text{C}_{17}\text{H}_{14}\text{BrNNa}^+ [\text{M}+\text{Na}]^+$  334.0202, found 334.0199.

**(E)- and (Z)-3-(3,4-Dimethylphenyl)-3-phenylprop-2-enenitrile 2n** [3] obtained from nitrile **1a** and 1,2-dimethylbenzene with  $\text{AlBr}_3$  in yield of 25%, slightly yellow oil:

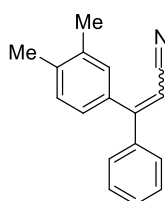

**$^1\text{H}$  NMR (400 MHz,  $\text{CDCl}_3$ ):** mixture of (E-) and (Z)-isomers,  $\delta$  2.25 (c 3H,  $\text{CH}_3$ ), 2.28 (c 3H,  $\text{CH}_3$ ), 2.29 (s, 3H,  $\text{CH}_3$ ), 2.32 (s, 3H,  $\text{CH}_3$ ), 5.66 (c 1H,  $-\text{CH}=\text{N}$ ), 5.70 (s, 1H,  $-\text{CH}=\text{N}$ ), 7.01 (m, 1H, Har), 7.07(s, 1H, Har), 7.13 (d, 1H, Har,  $J = 8.0$  Hz), 7.17-7.21 (m, 3H, Har), 7.29-7.31 (m, 2H, Har), 7.35-7.38 (m, 2H, Har), 7.42-7.46 (m, 5H, Har);

**$^{13}\text{C}$  NMR (100 MHz,  $\text{CDCl}_3$ ):** mixture of (E-) and (Z)-isomers,  $\delta$  19.8( $\text{CH}_3$ ), 19.9(3 $\text{CH}_3$ ), 93.9( $-\text{CH}=\text{N}$ ), 94.2( $-\text{CH}=\text{N}$ ), 118.3( $2\text{C}\equiv\text{N}$ ), 126.2(CarH), 127.3(CarH), 128.6(CarH), 128.7(CarH), 129.6(CarH), 129.7(CarH), 129.9(CarH), 130.0(2CarH), 130.4(CarH), 130.7(CarH), 134.7(Car), 136.7(Car), 136.9(Car), 137.1(Car), 137.4(Car), 139.1(Car), 139.5(Car), 139.7(Car), 163.4(C), 163.5(C);

**IR (KBr),  $\nu$ ,  $\text{cm}^{-1}$ :** 2212 ( $\text{C}\equiv\text{N}$ );

**HRMS,  $m/z$ :** calcd.  $\text{C}_{17}\text{H}_{15}\text{NNa}^+ [\text{M}+\text{Na}]^+$  256.1097, found 256.1097.

**3-(2,3-Dimethylphenyl)-3-phenylprop-2-enenitrile 2o** (E- or Z-configuration was unclear) obtained from nitrile **1a** and 1,2-dimethylbenzene with  $\text{AlBr}_3$  in yield of 20%, slightly yellow oil:

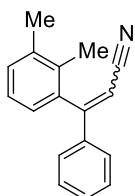

**$^1\text{H}$  NMR (400 MHz,  $\text{CDCl}_3$ ):**  $\delta$  2.01 (s, 3H,  $\text{CH}_3$ ), 2.32 (s, 3H,  $\text{CH}_3$ ), 5.98 (s, 1H,  $-\text{CH}=\text{N}$ ), 7.06d (d, 1H, Har,  $J = 6.0$  Hz), 7.19 (t, 1H, Har,  $J = 6.0$  Hz), 7.24 (d, 1H, Har,  $J = 6.4$  Hz), 7.28 (d, 2H, Har,  $J = 6.0$  Hz), 7.35 (t, 2H, Har,  $J = 6.0$  Hz), 7.38-7.41 (m, 1H, Har);

**<sup>13</sup>C NMR (100 MHz, CDCl<sub>3</sub>):** δ 16.7(CH<sub>3</sub>), 20.5(CH<sub>3</sub>), 96.3(-CH=), 117.6(C≡N), 125.9(CarH), 127.1(CarH), 127.3(CarH), 129.0(CarH), 130.6(CarH), 130.9(CarH), 134.4(Car), 136.9(Car), 137.8(2Car), 163.8(C);

**IR (KBr), ν, cm<sup>-1</sup>:** 2215 (C≡N);

**HRMS, m/z:** calcd. C<sub>17</sub>H<sub>15</sub>NNa<sup>+</sup>[M+Na]<sup>+</sup> 256.1097, found 256.1096.

**4,7-Dimethyl-3-phenyl-1H-inden-1-one 3a** obtained from nitrile **2c** в TfOH in yield of 70%, slightly yellow oil:

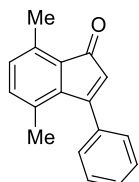

**<sup>1</sup>H NMR (400 MHz, CDCl<sub>3</sub>):** δ 1.87 s, 3H, CH<sub>3</sub>), 2.53 (s, 3H, CH<sub>3</sub>), 5.73 (s, 1H, -CH=), 6.92-6.96 (m, 2H, Har), 7.37-7.46 (m, 5H, Har);

**<sup>13</sup>C NMR (100 MHz, CDCl<sub>3</sub>):** δ 17.2(CH<sub>3</sub>), 19.7(CH<sub>3</sub>), 126.2(CarH), 127.0(CarH), 128.6(CarH), 129.0(CarH), 130.8(Car), 132.8(CarH), 135.6(Car), 136.5(Car), 136.7(CarH), 141.9(Car), 164.8(C), 198.8(C=O);

**IR (KBr), ν, cm<sup>-1</sup>:** 1699 (C=O);

**HRMS, m/z:** calcd. C<sub>17</sub>H<sub>15</sub>O<sup>+</sup> [M+H]<sup>+</sup> 235.1117, found 235.1117.

**3-(4-Chlorophenyl)-4,6,7-trimethyl-1H-inden-1-one 3b** obtained from nitrile **2g** в TfOH in yield of 55%, slightly yellow oil:

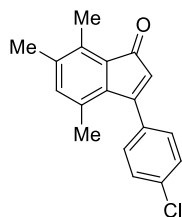

**<sup>1</sup>H NMR (400 MHz, CDCl<sub>3</sub>):** δ 1.85 (s, 3H, CH<sub>3</sub>), 2.23 (s, 3H, CH<sub>3</sub>), 2.49 (s, 3H, CH<sub>3</sub>), 5.66 (s, 1H, -CH=), 6.83 (s, 1H, Har), 7.32 (m, 2H, Har, *J* = 8.0 Hz), 7.41 (m, 2H, Har, *J* = 6.8 Hz);

**<sup>13</sup>C NMR (100 MHz, CDCl<sub>3</sub>):** δ 12.9(CH<sub>3</sub>), 19.2(CH<sub>3</sub>), 19.7(CH<sub>3</sub>), 126.2(CarH), 128.5(CarH), 128.7(Car), 128.9(CarH), 130.2(Car), 130.0(Car), 135.1(Car), 135.7(Car), 137.2(CarH), 139.5(Car), 140.5(Car), 163.3(C), 198.9(C=O);

**IR (KBr), ν, cm<sup>-1</sup>:** 1694 (C=O);

**HRMS, m/z:** calcd. C<sub>18</sub>H<sub>15</sub>ClNaO<sup>+</sup> [M+Na]<sup>+</sup> 305.0704, found 305.0701.

#### 4. References

- [1] T. Wang, H. Yin, N. Jiao, *Adv. Synth. Catal.*, **2013**, 355, 1207– 1210.
- [2] J. Masllorens, M. Moreno-Mañas, A. Pla-Quintana, R. Pleixats, A. Roglans, *Synthesis*, **2002**, 1903-1911.
- [3] L. Hao, F. Wu, Z.-C. Ding, S.-X. Xu, Y.-L. Ma, L. Chen, Z.-P. Zhan, *Chem. Eur. J.*, **2012**, 18, 6453-6456.

5.  $^1\text{H}$  and  $^{13}\text{C}$  NMR spectra, DEPT-135, COSY, NOESY spectra of compounds **1a-c**, **2a-o**, **3a,b**

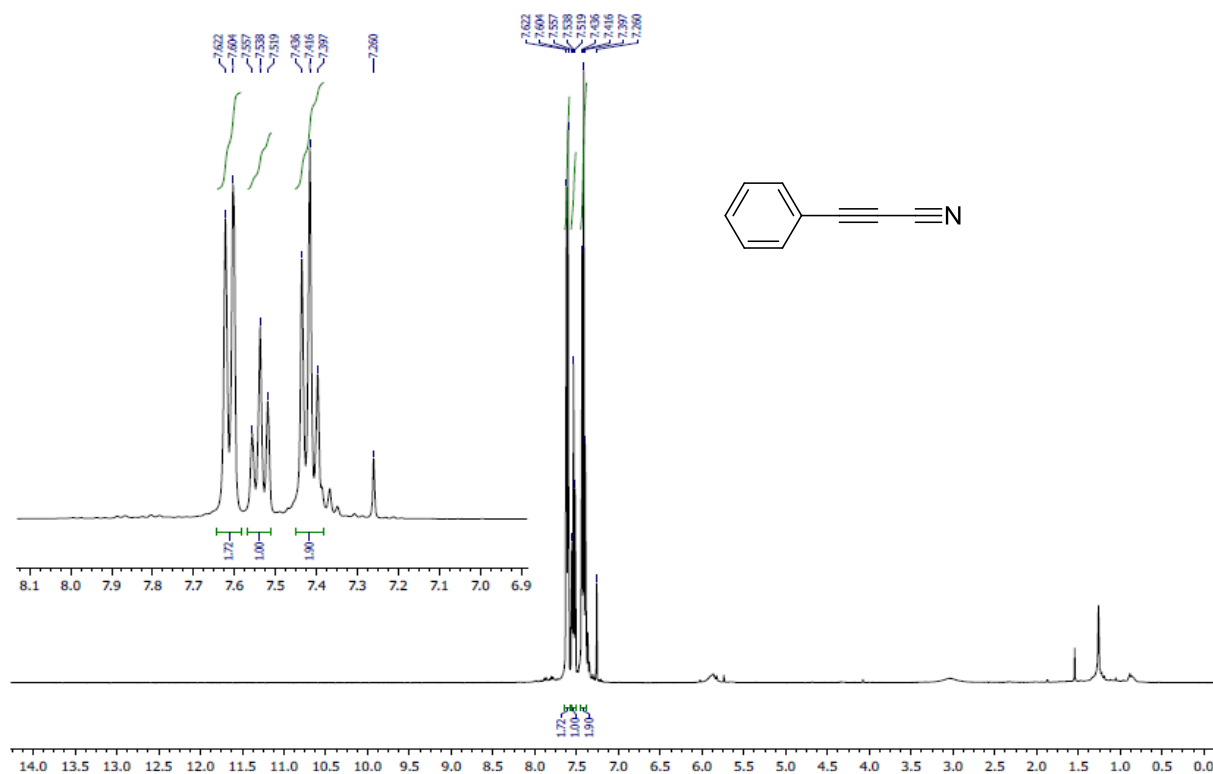

Figure S1.  $^1\text{H}$  NMR spectrum of compound **1a** ( $\text{CDCl}_3$ , 400 MHz).

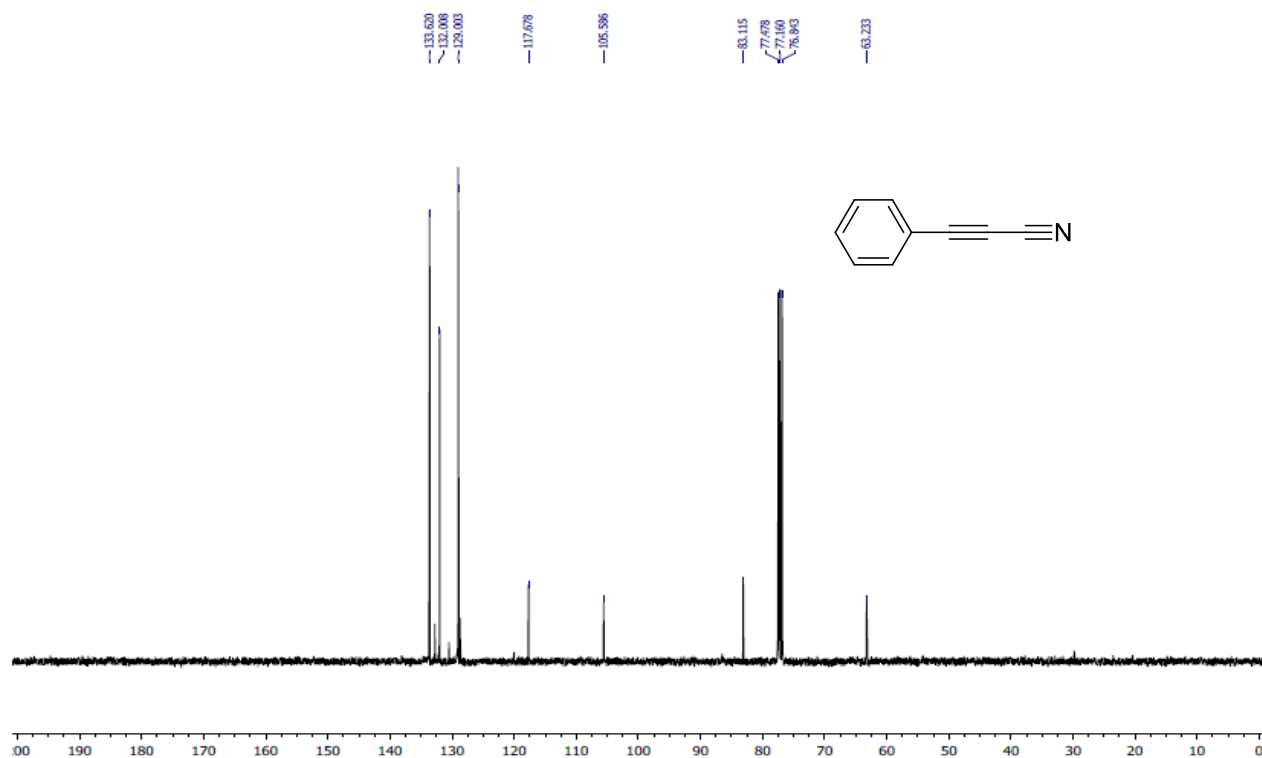

Figure S2.  $^{13}\text{C}$  NMR spectrum of compound **1a** ( $\text{CDCl}_3$ , 100 MHz).

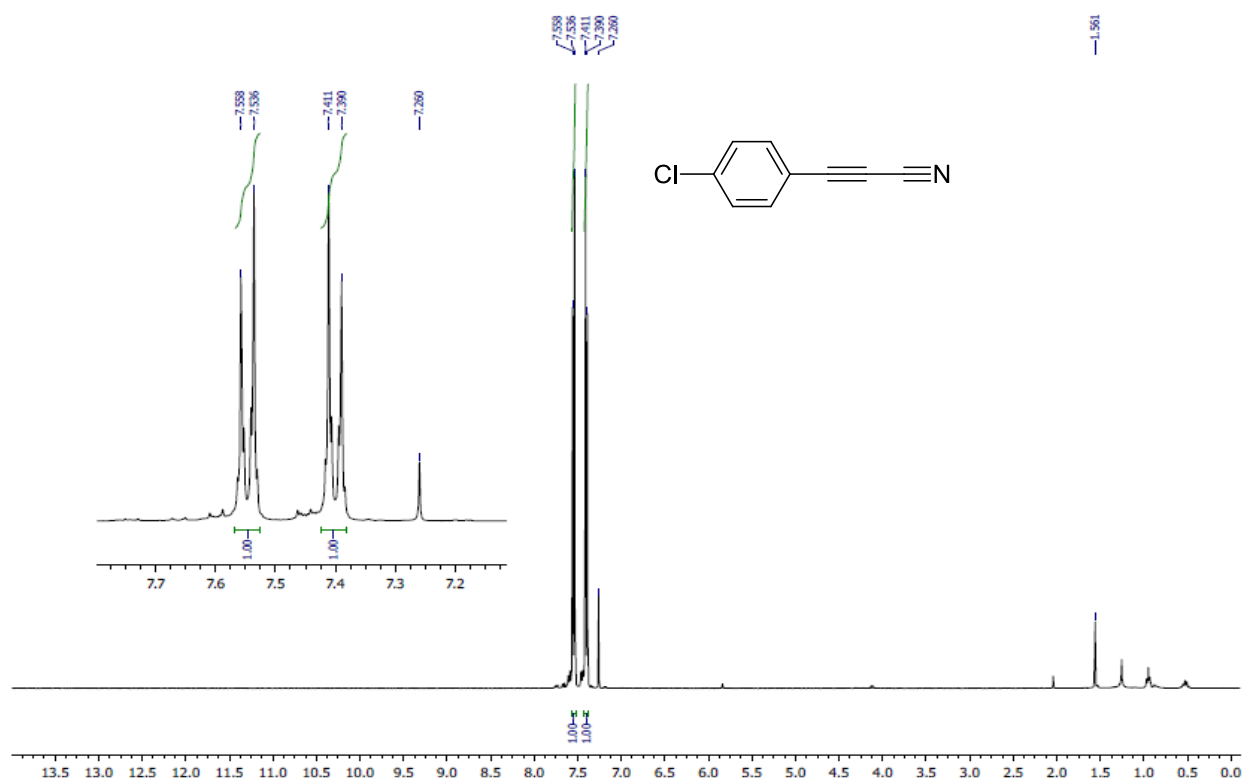

Figure S3. <sup>1</sup>H NMR spectrum of compound **1b** (CDCl<sub>3</sub>, 400 MHz).

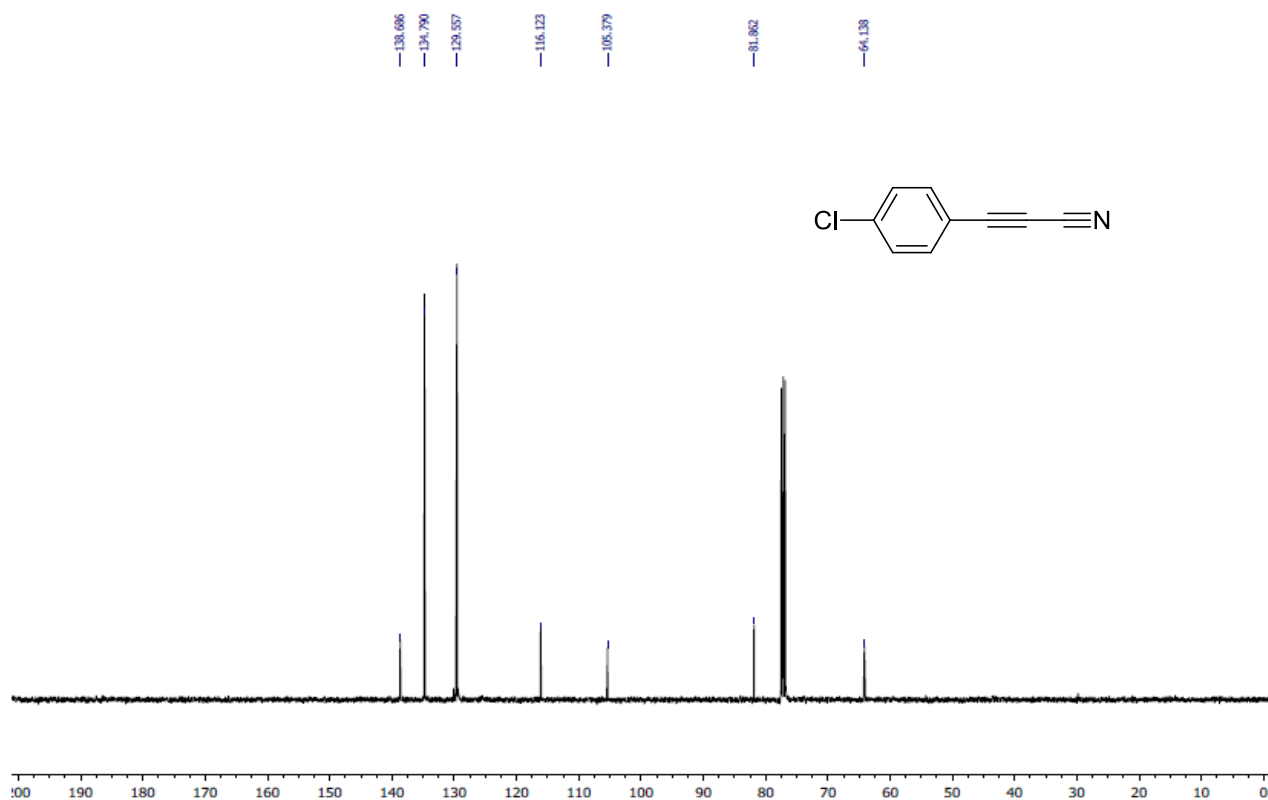

Figure S4. <sup>13</sup>C NMR spectrum of compound **1b** (CDCl<sub>3</sub>, 100 MHz).





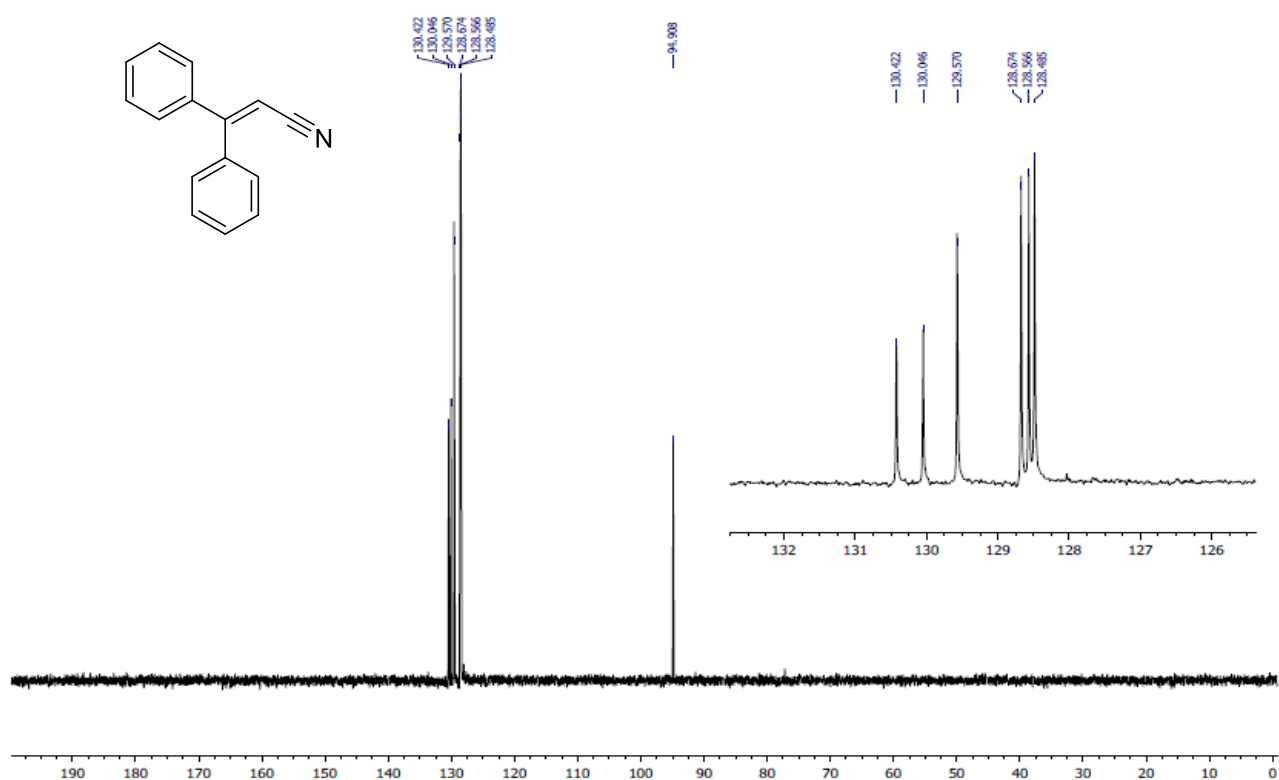

Figure S9. DEPT<sup>135</sup> NMR spectrum of compound **2a** (CDCl<sub>3</sub>, 400 MHz).

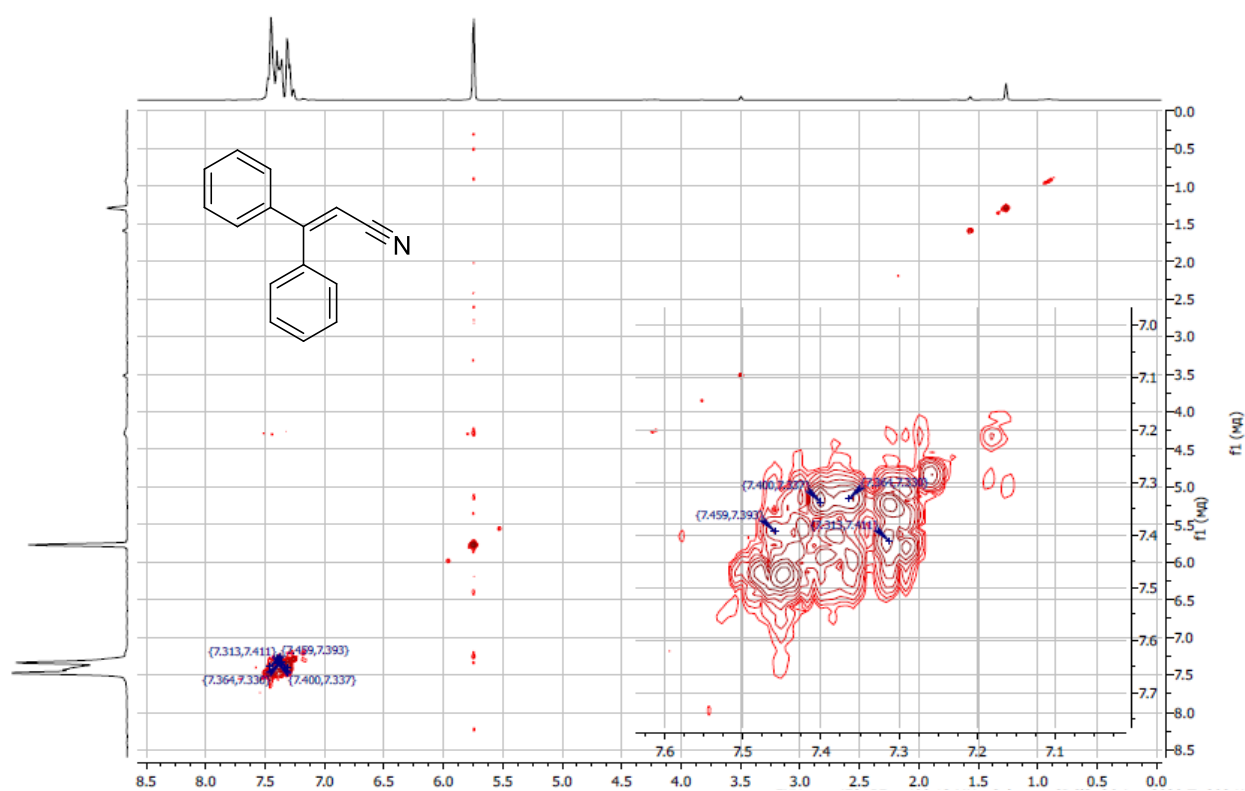

Figure S10. COSY NMR spectrum of compound **2a** (CDCl<sub>3</sub>, 400 MHz).

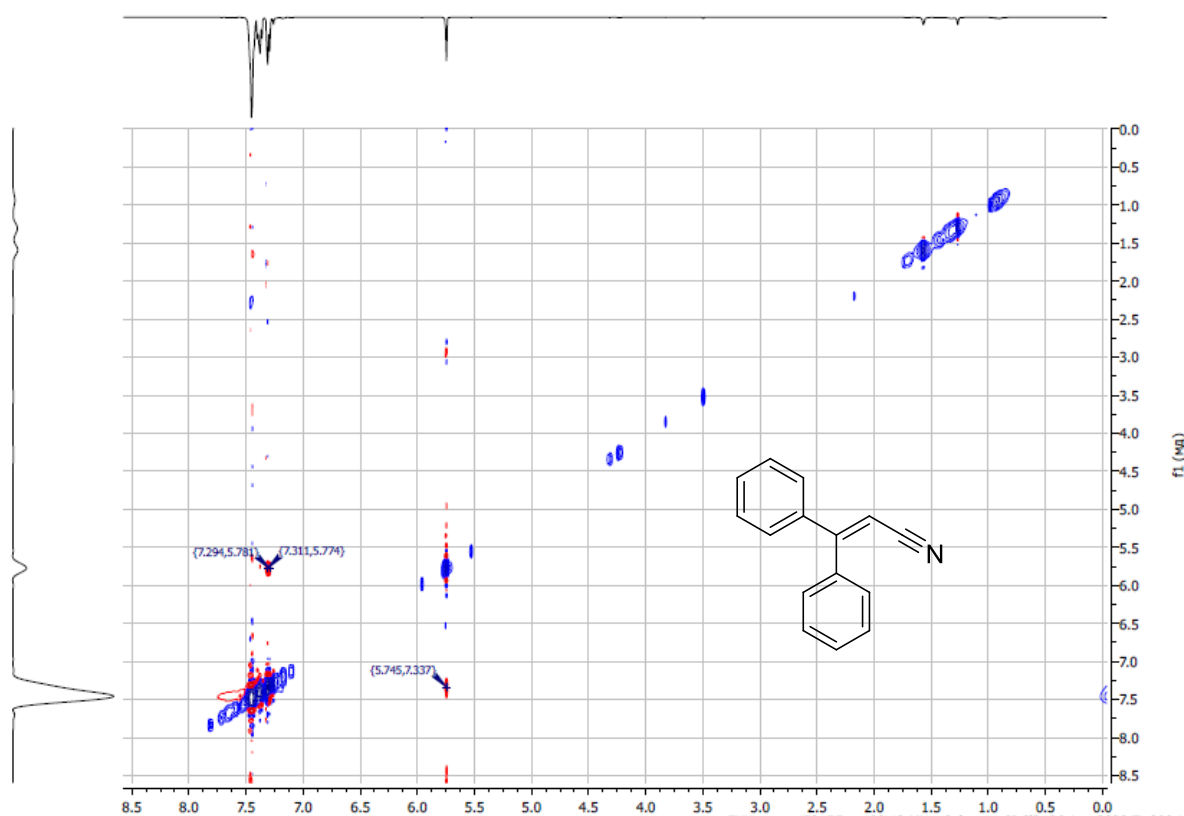

Figure S11. NOESY NMR spectrum of compound **2a** (CDCl<sub>3</sub>, 400 MHz).

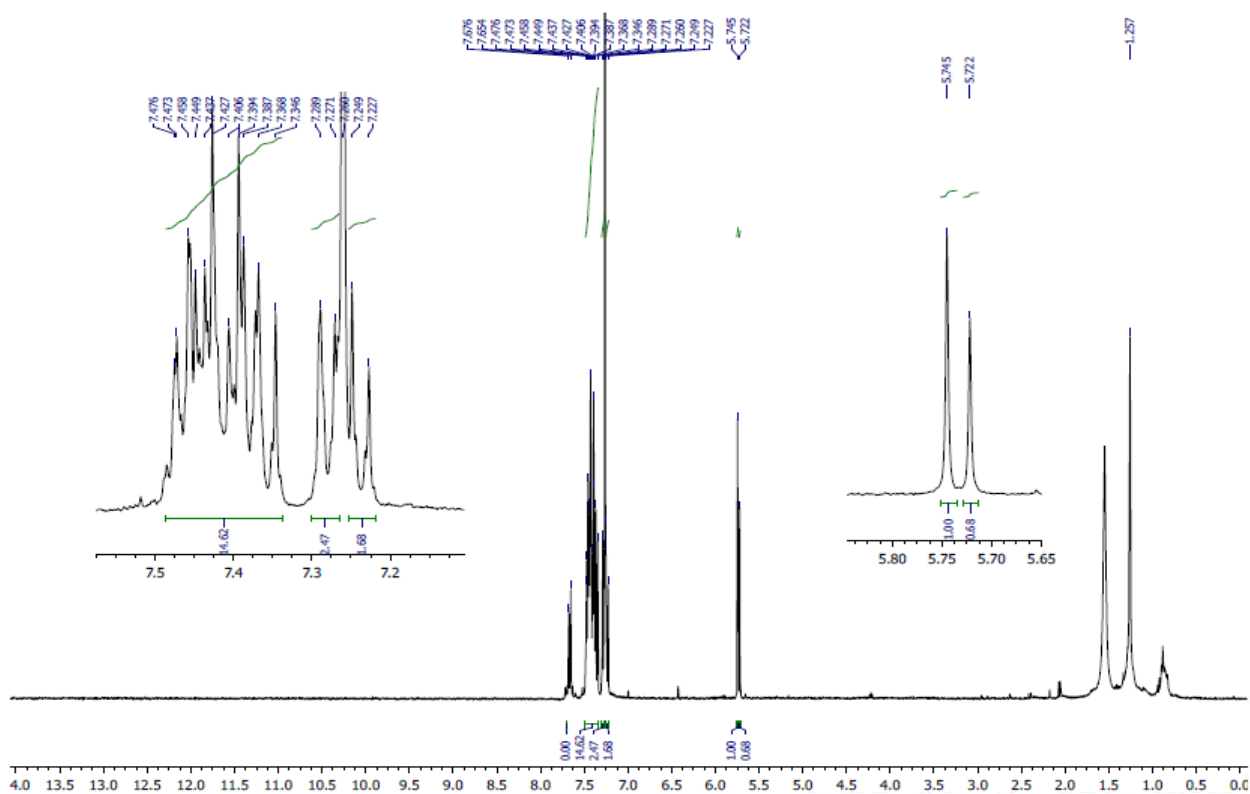

Figure S12. <sup>1</sup>H NMR spectrum of mixture of compounds *E*-,*Z*-**2b** (CDCl<sub>3</sub>, 400 MHz).



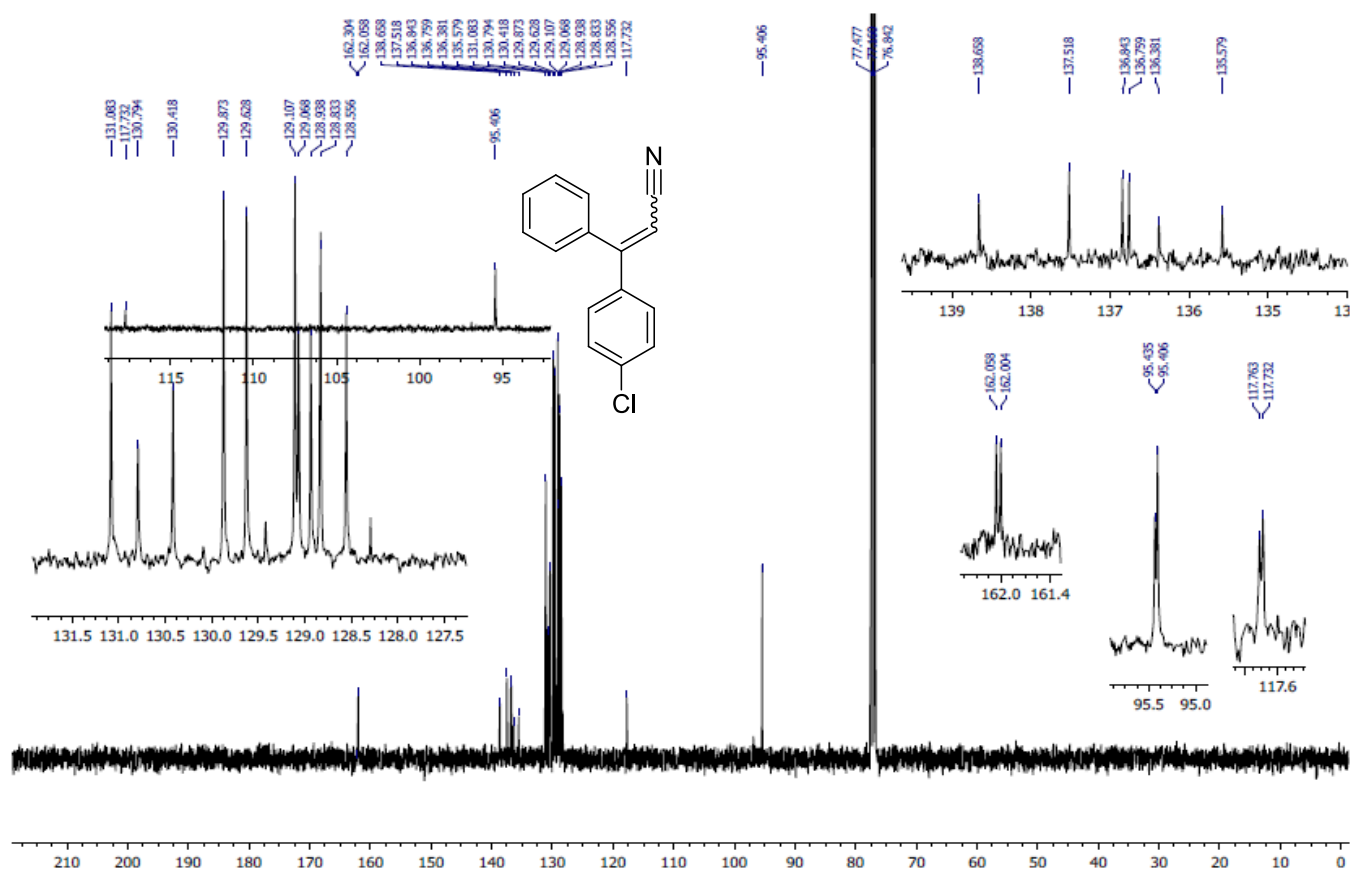

Figure S13. <sup>13</sup>C NMR spectrum of mixture of compounds *E,Z*-**2b** (CDCl<sub>3</sub>, 100 MHz).

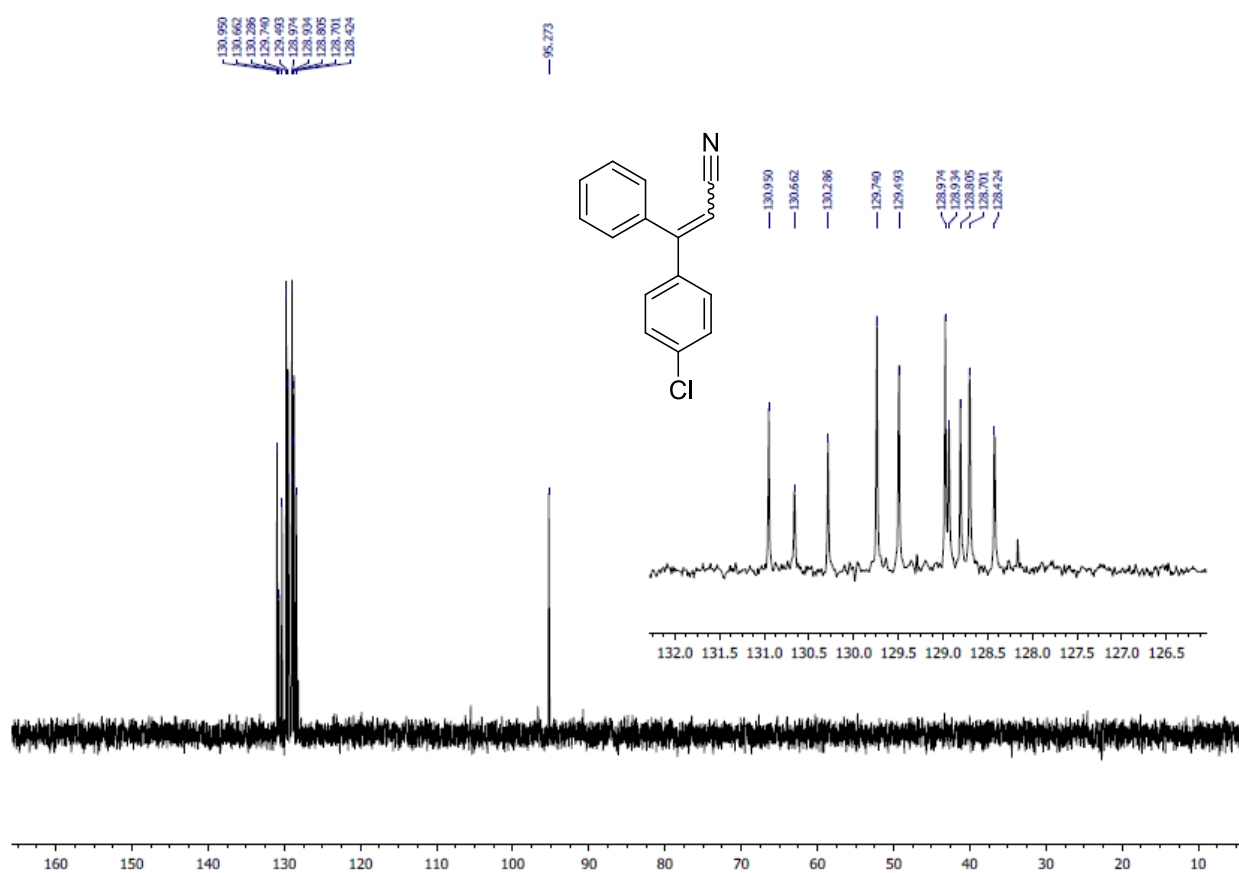

Figure S14. DEPT-<sup>135</sup> NMR spectrum of mixture of compounds *E,Z*-**2b** (CDCl<sub>3</sub>, 400 MHz).

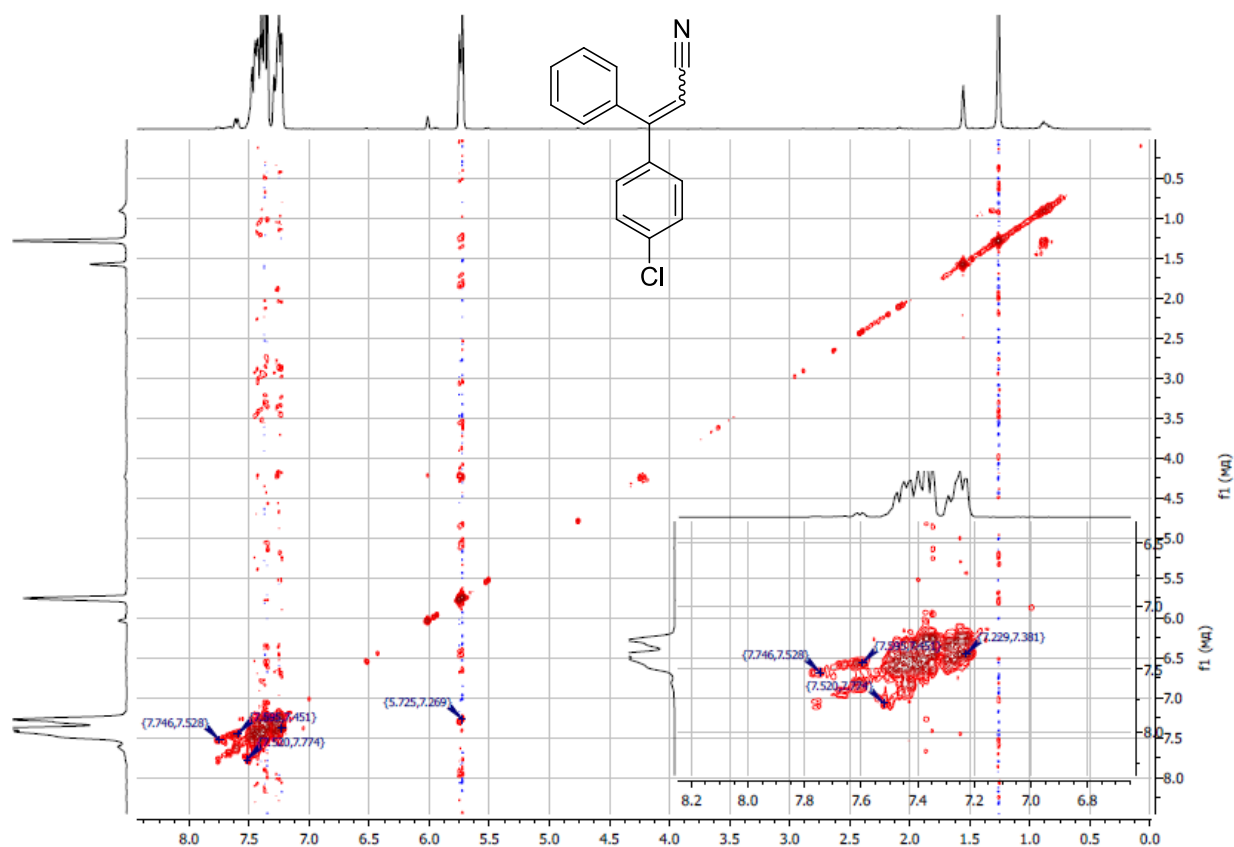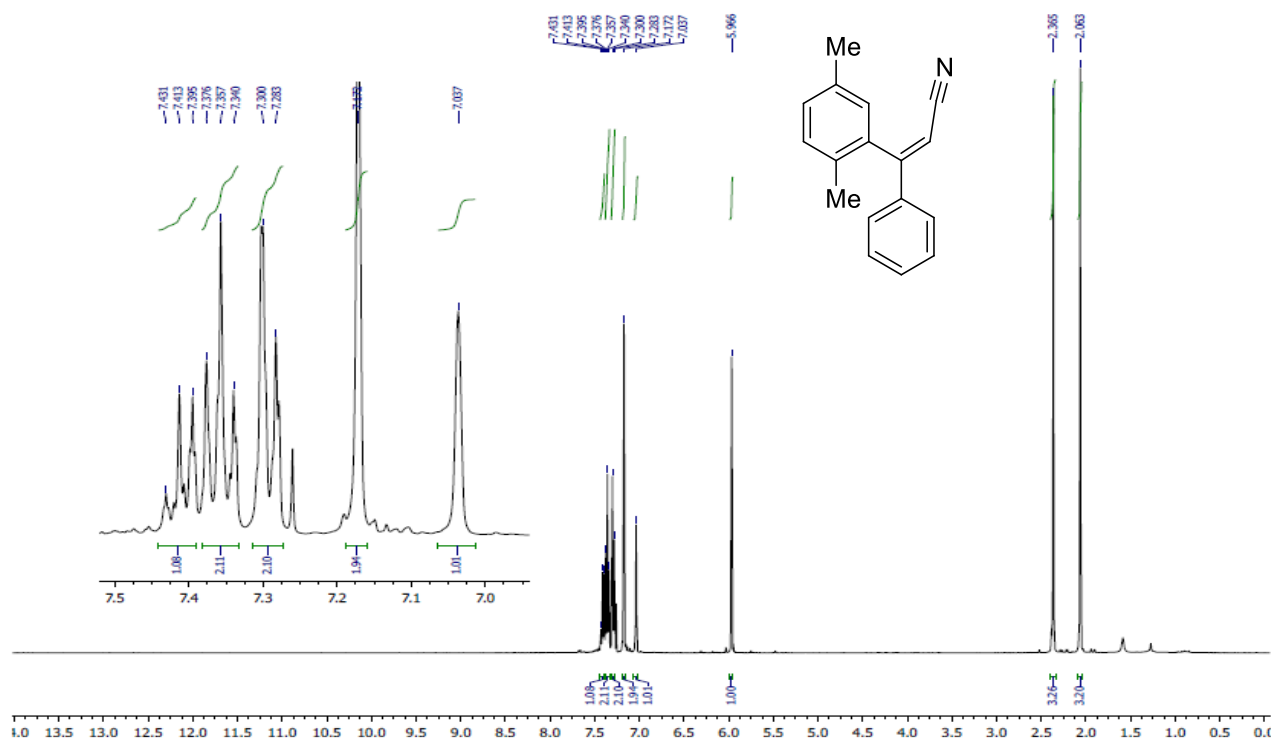

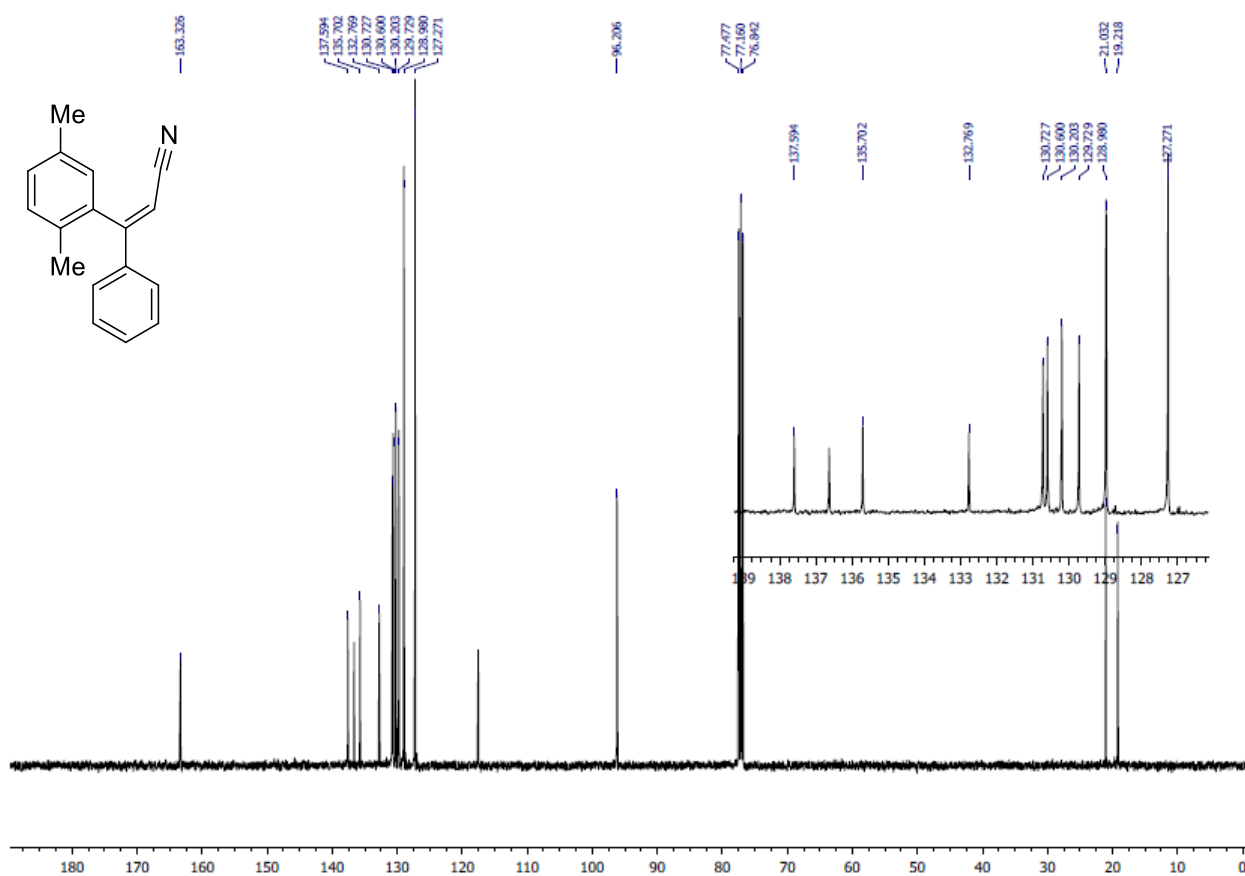

Figure S17. <sup>13</sup>C NMR spectrum of compound **2c** (CDCl<sub>3</sub>, 100 MHz).

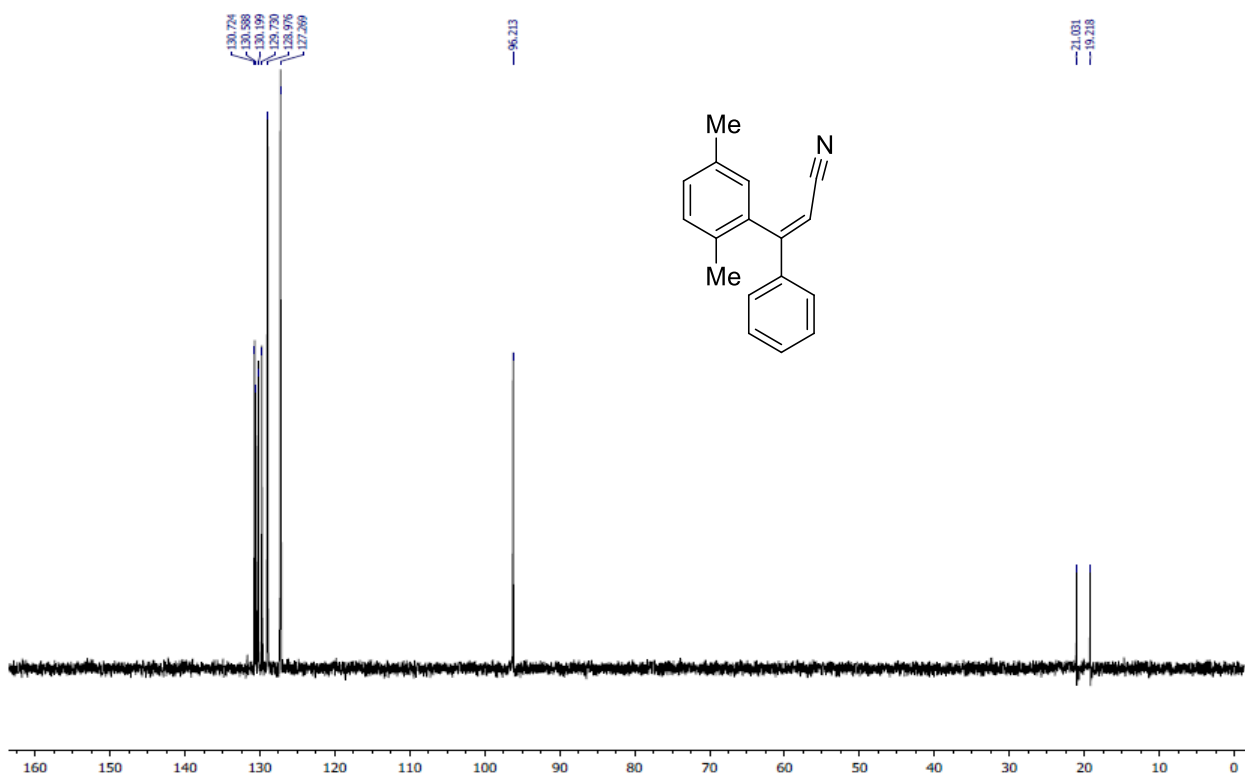

Figure S18. DEPT-<sup>135</sup> NMR spectrum of compound **2c** (CDCl<sub>3</sub>, 400 MHz).

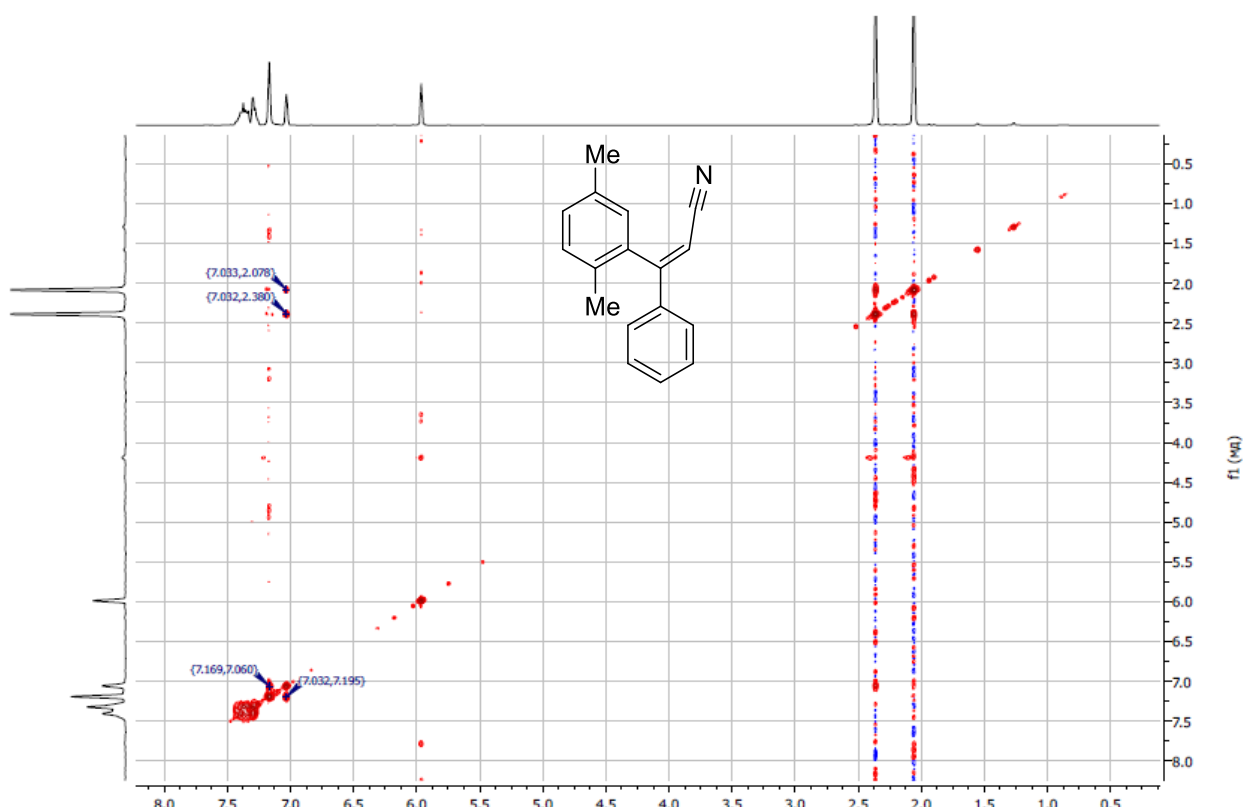

Figure S19. COSY NMR spectrum of compound **2c** (CDCl<sub>3</sub>, 400 MHz).

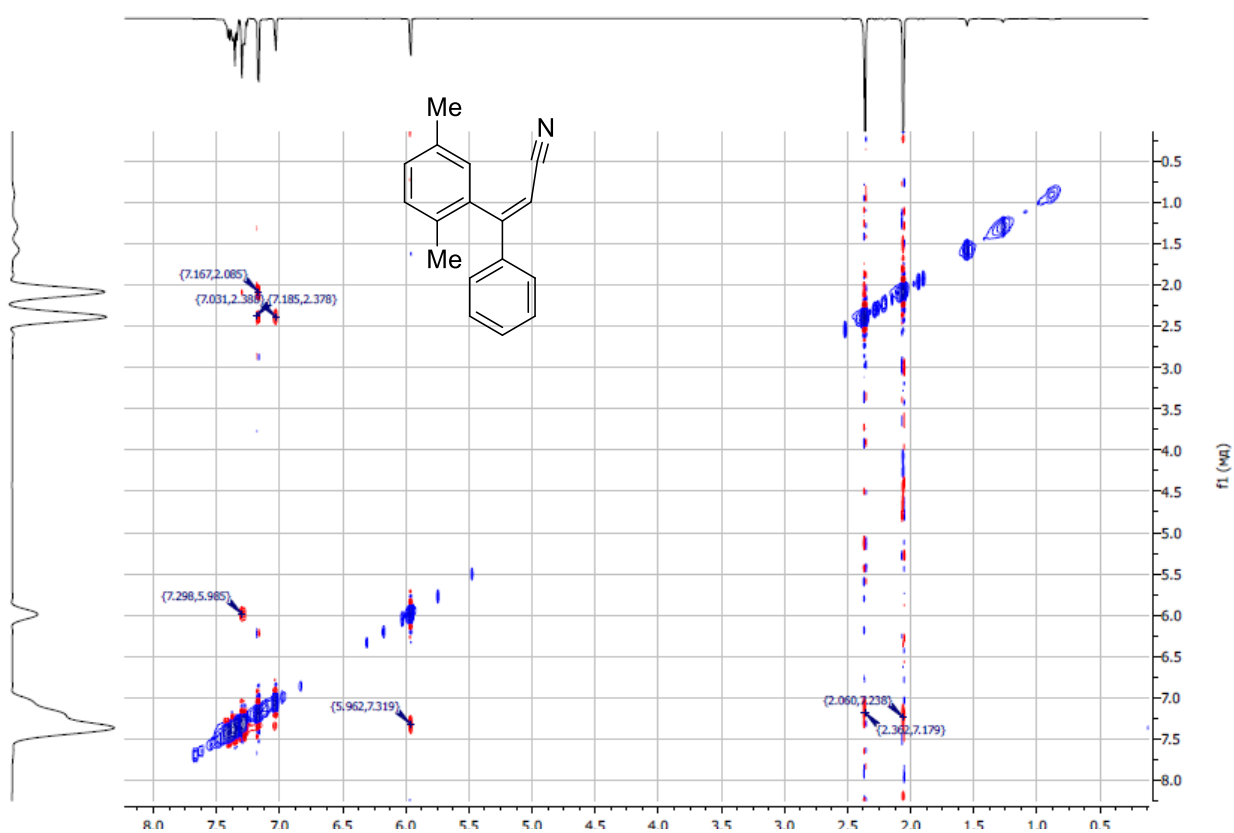

Figure S20. NOESY NMR spectrum of compound **2c** (CDCl<sub>3</sub>, 400 MHz).

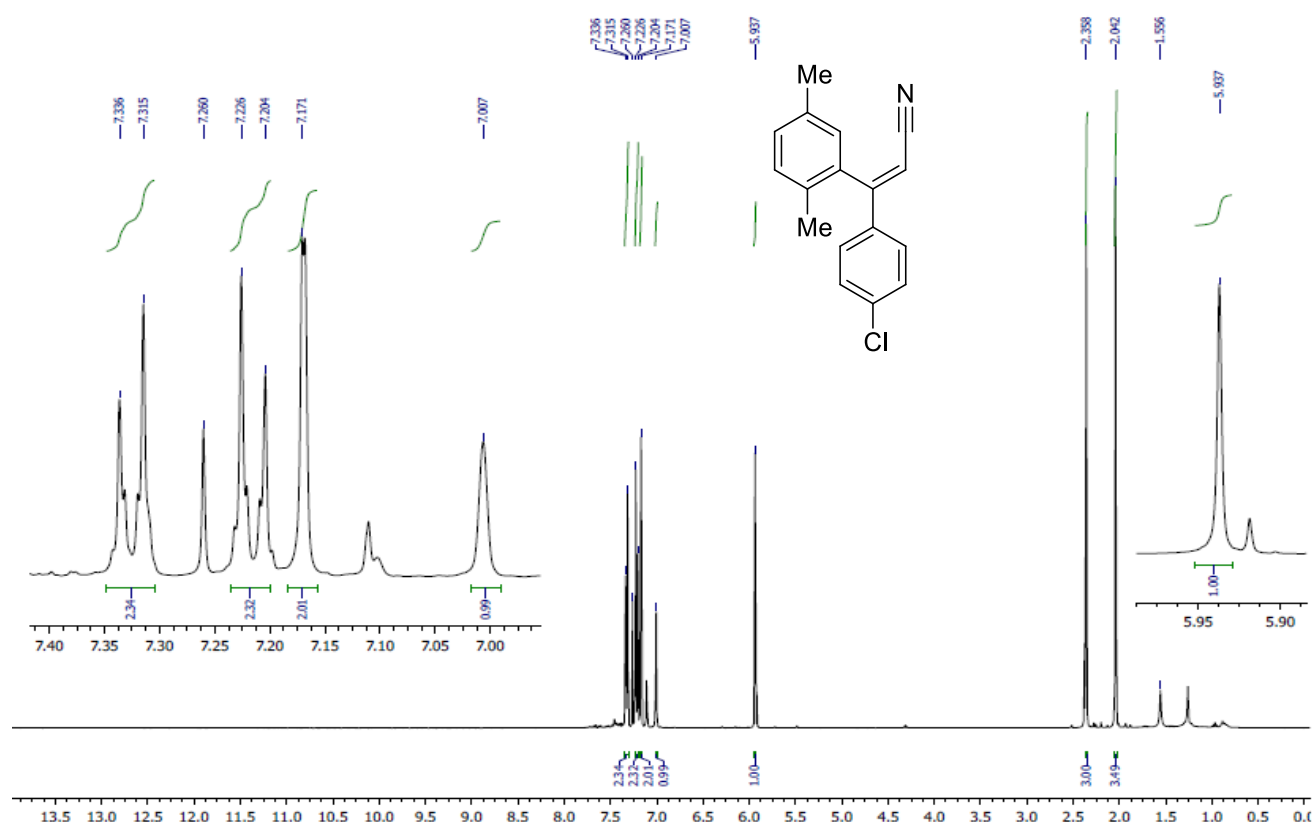

Figure S21. <sup>1</sup>H NMR spectrum of compound **2d** (CDCl<sub>3</sub>, 400 MHz).

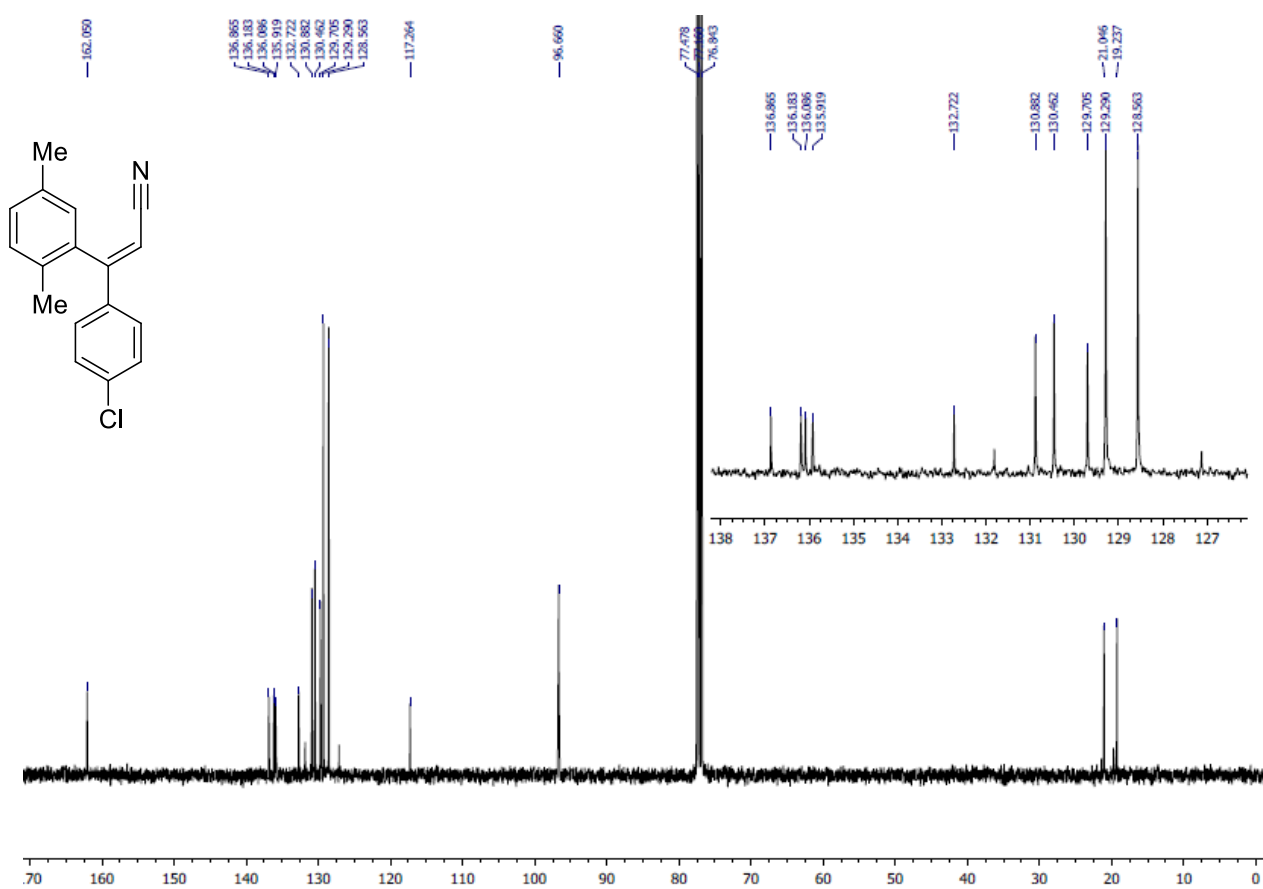

Figure S22. <sup>13</sup>C NMR spectrum of compound **2d** (CDCl<sub>3</sub>, 100 MHz).

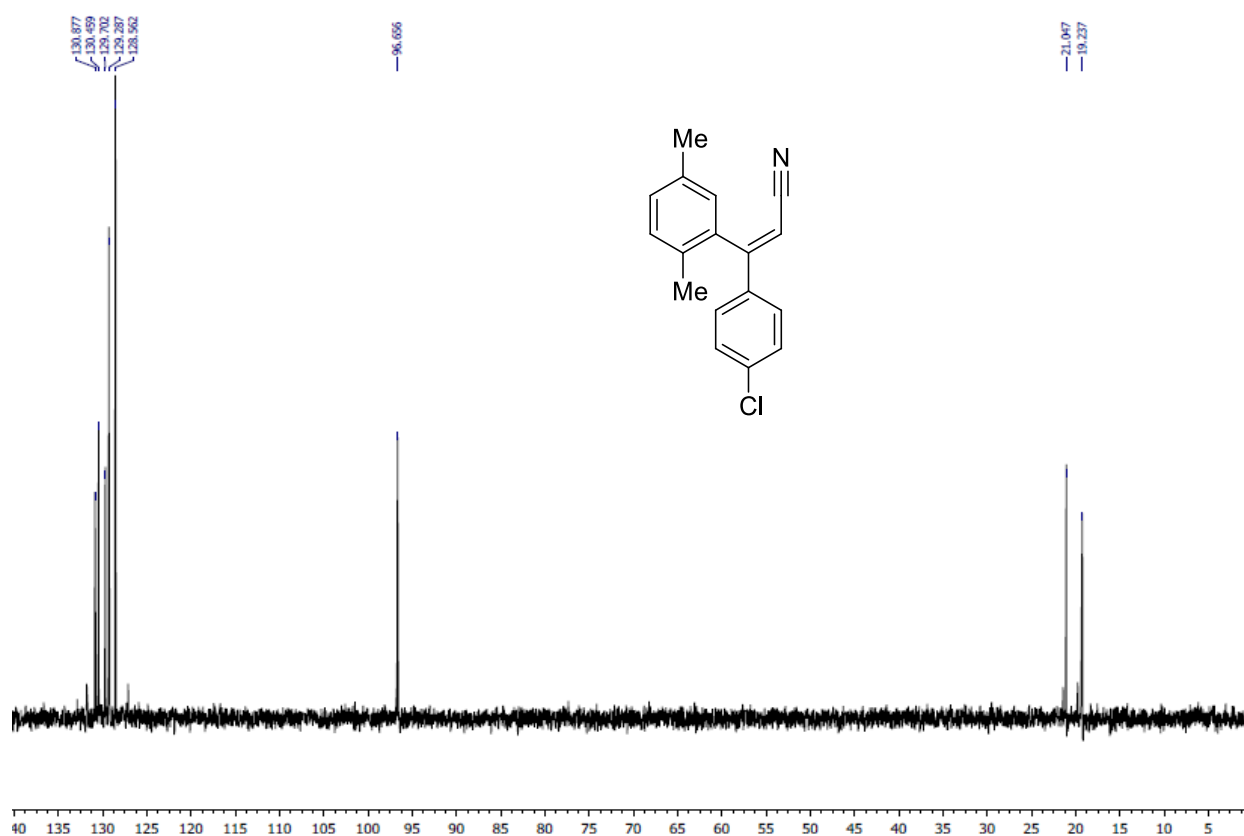

Figure S23. DEPT<sup>135</sup> NMR spectrum of compound **2d** (CDCl<sub>3</sub>, 400 MHz).

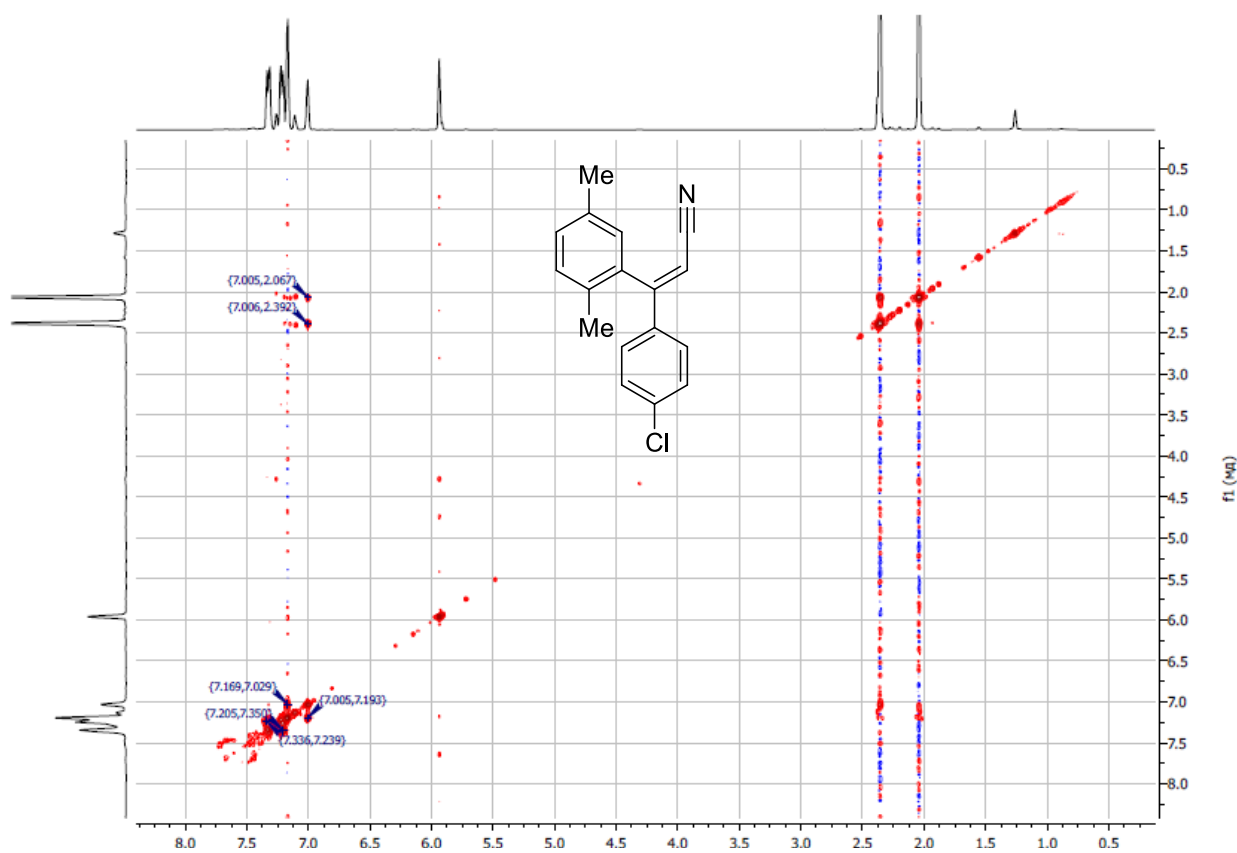

Figure S24. COSY NMR spectrum of compound **2d** (CDCl<sub>3</sub>, 400 MHz).

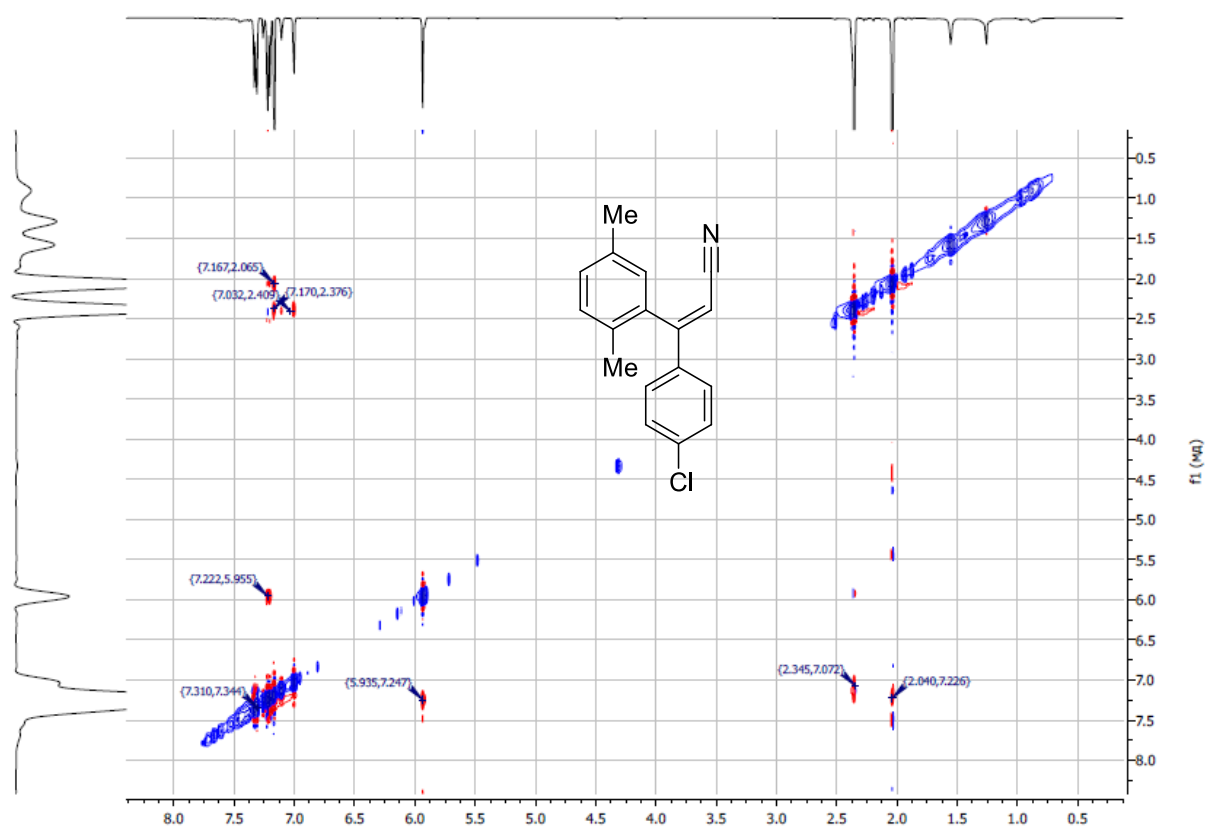

Figure S25. NOESY NMR spectrum of compound **2d** ( $\text{CDCl}_3$ , 400 MHz).

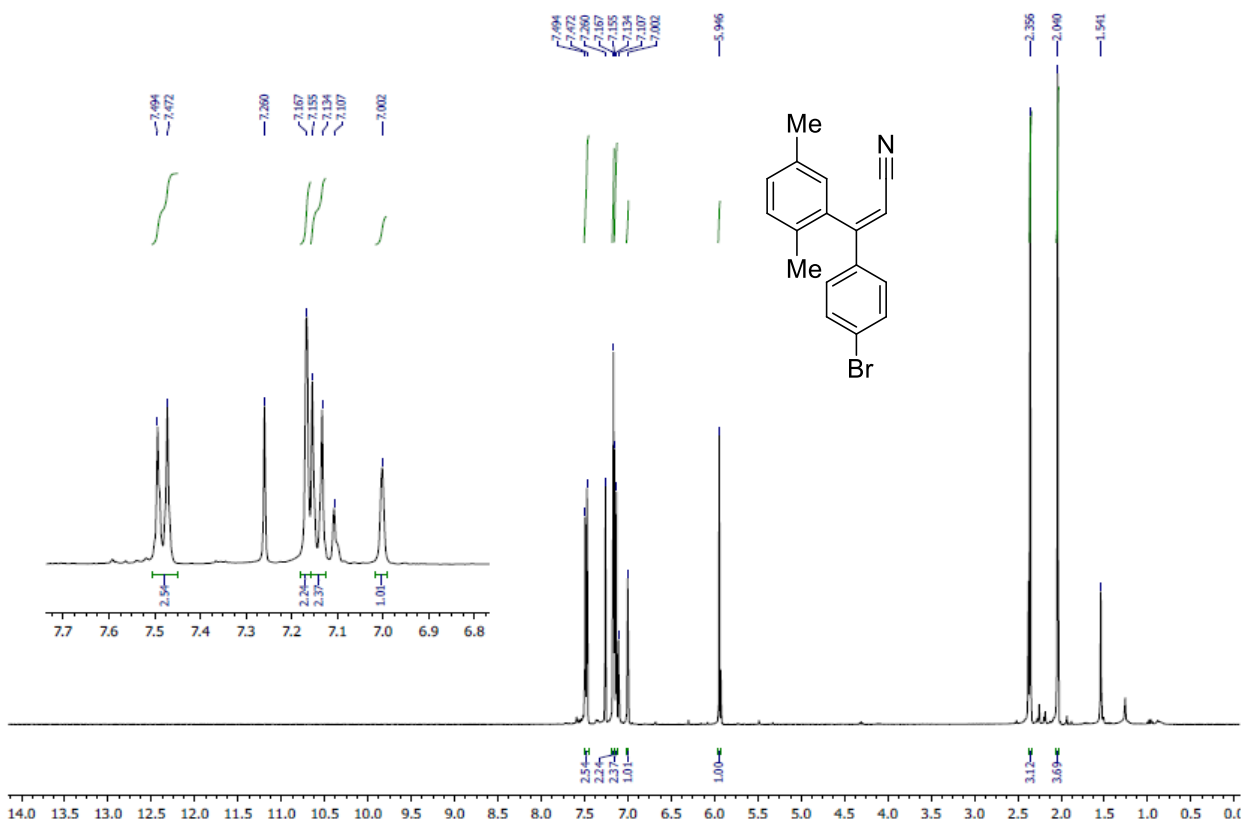

Figure S26.  $^1\text{H}$  NMR spectrum of compound **2e** ( $\text{CDCl}_3$ , 400 MHz).

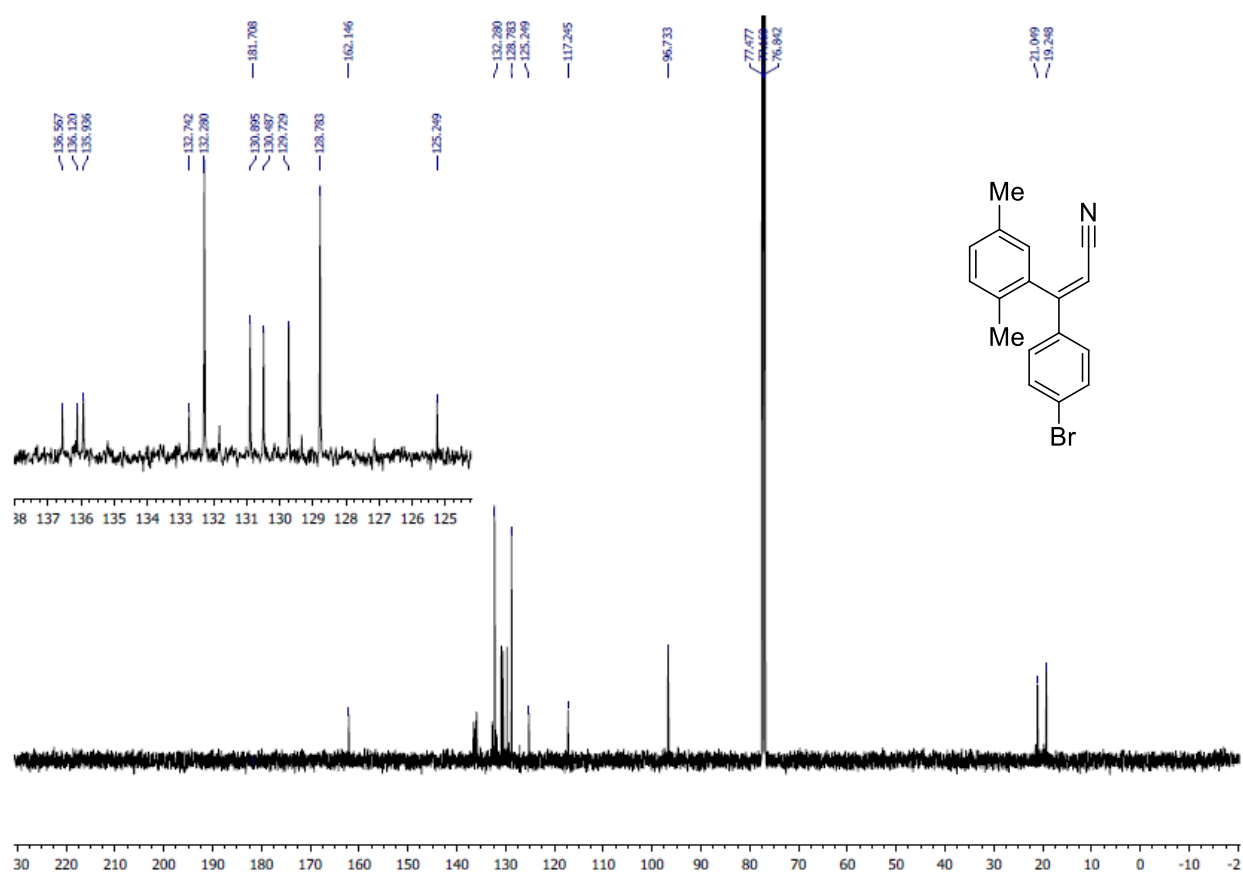

Figure S27. <sup>13</sup>C NMR spectrum of compound **2e** (CDCl<sub>3</sub>, 100 MHz).

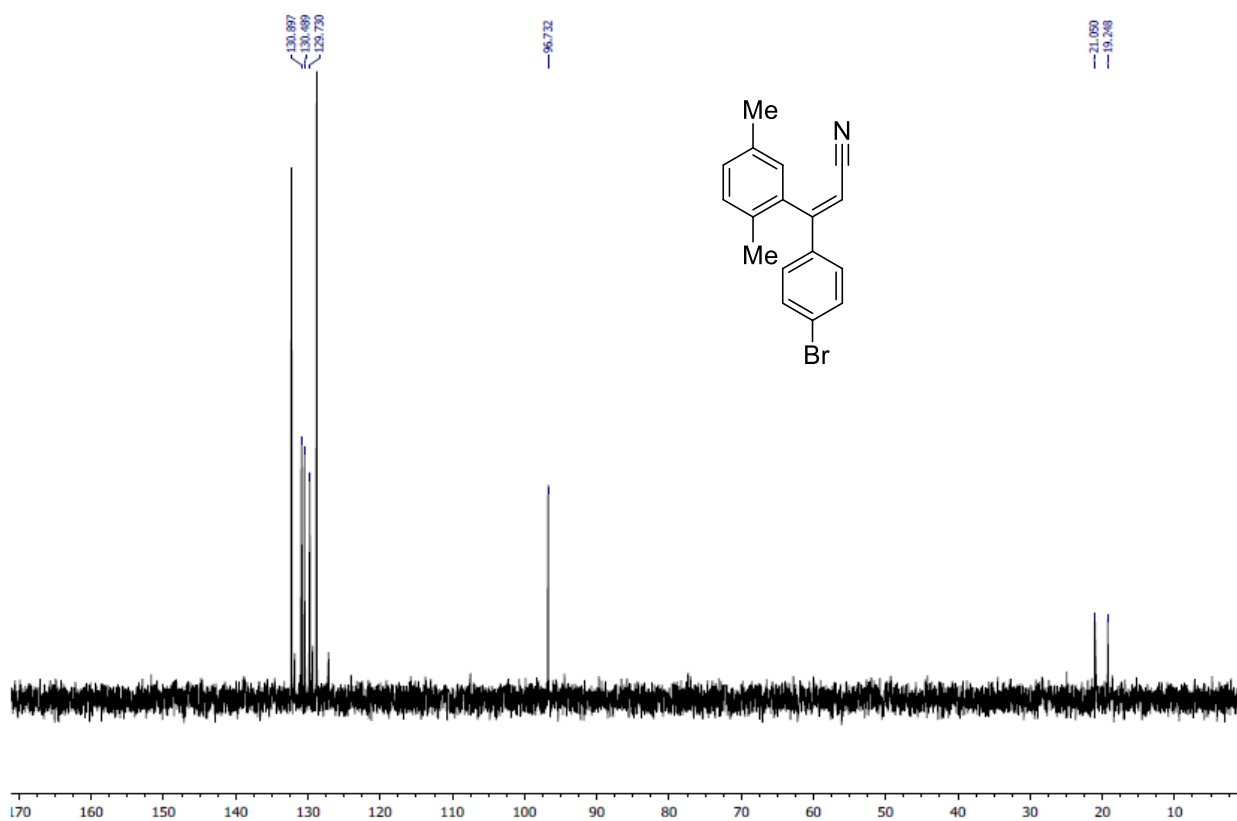

Figure S28. DEPT-135 NMR spectrum of compound **2e** (CDCl<sub>3</sub>, 400 MHz).



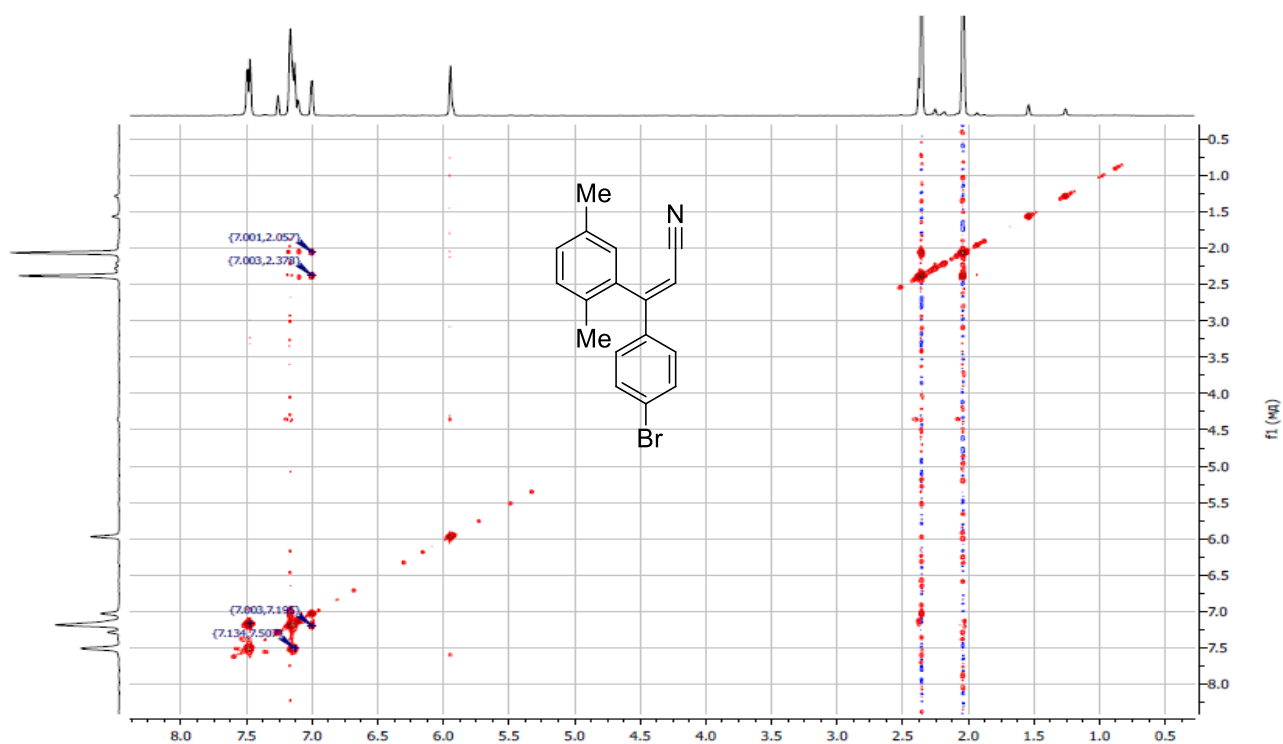

Figure S29. COSY NMR spectrum of compound **2e** (CDCl<sub>3</sub>, 400 MHz).

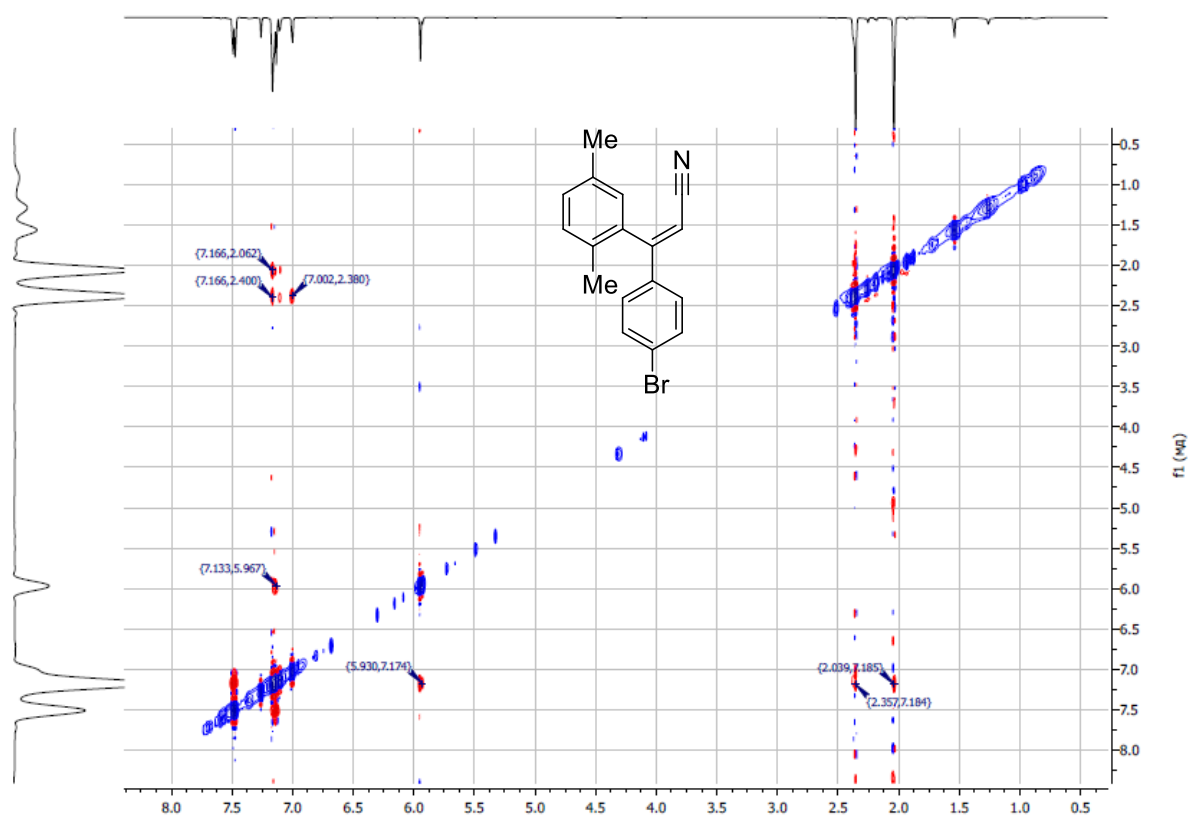

Figure S30. NOESY NMR spectrum of compound **2e** (CDCl<sub>3</sub>, 400 MHz).

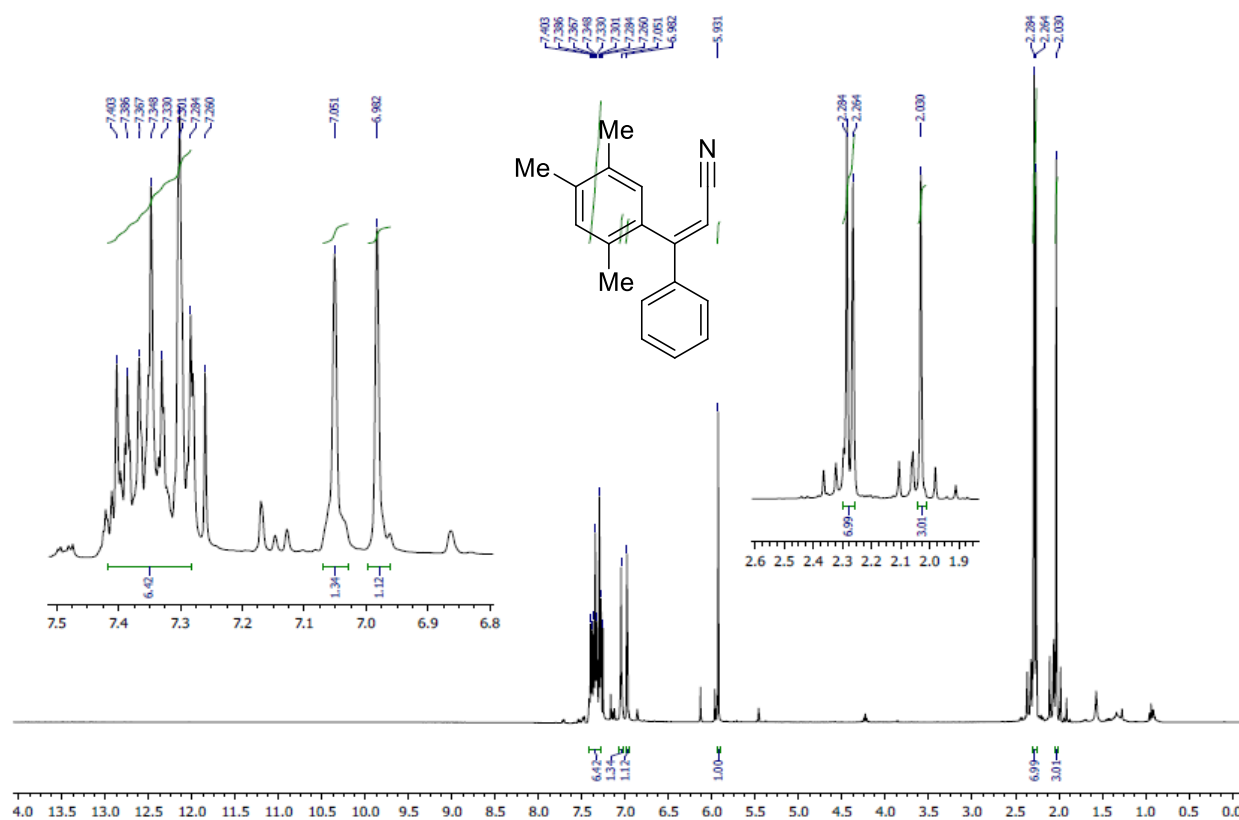

Figure S31. <sup>1</sup>H NMR spectrum of compound **2f** (CDCl<sub>3</sub>, 400 MHz).

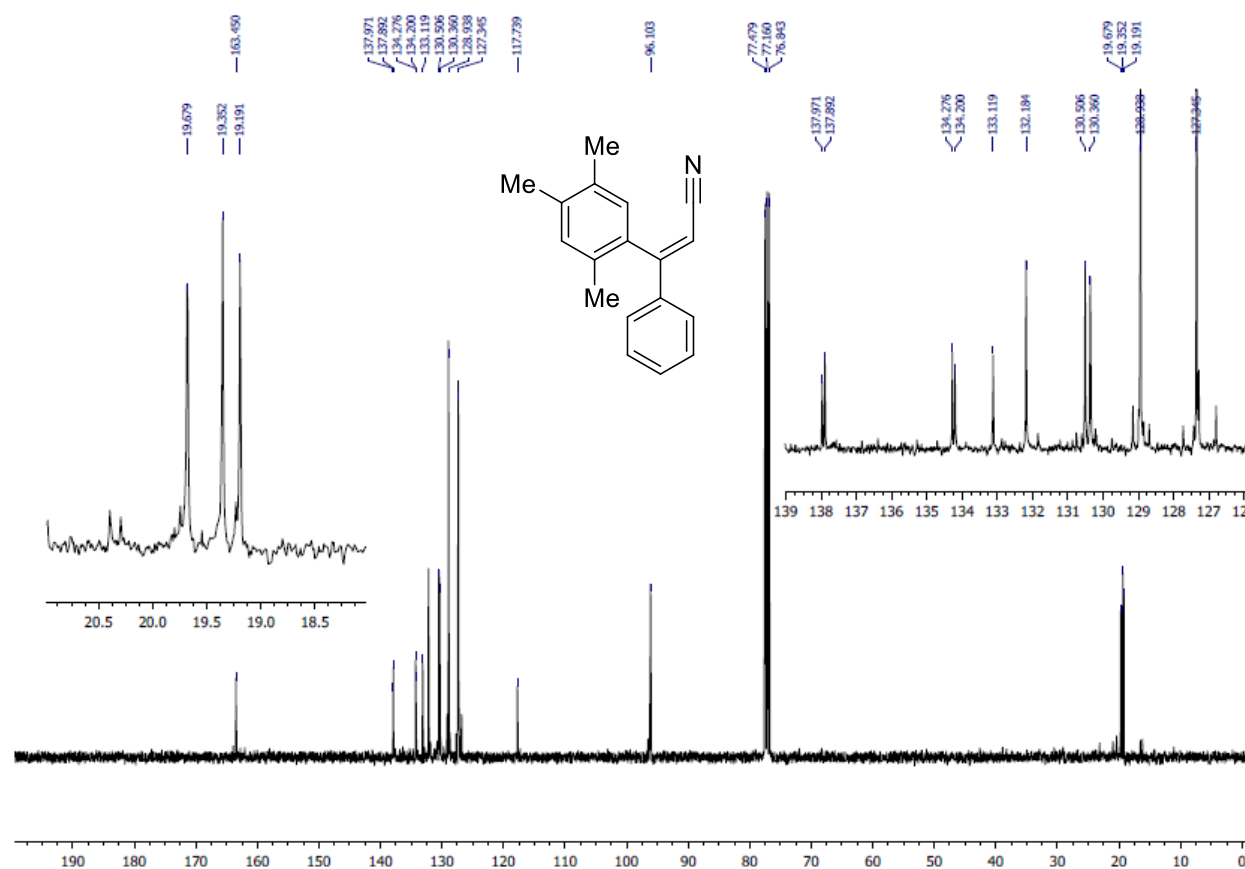

Figure S32. <sup>13</sup>C NMR spectrum of compound **2f** (CDCl<sub>3</sub>, 100 MHz).

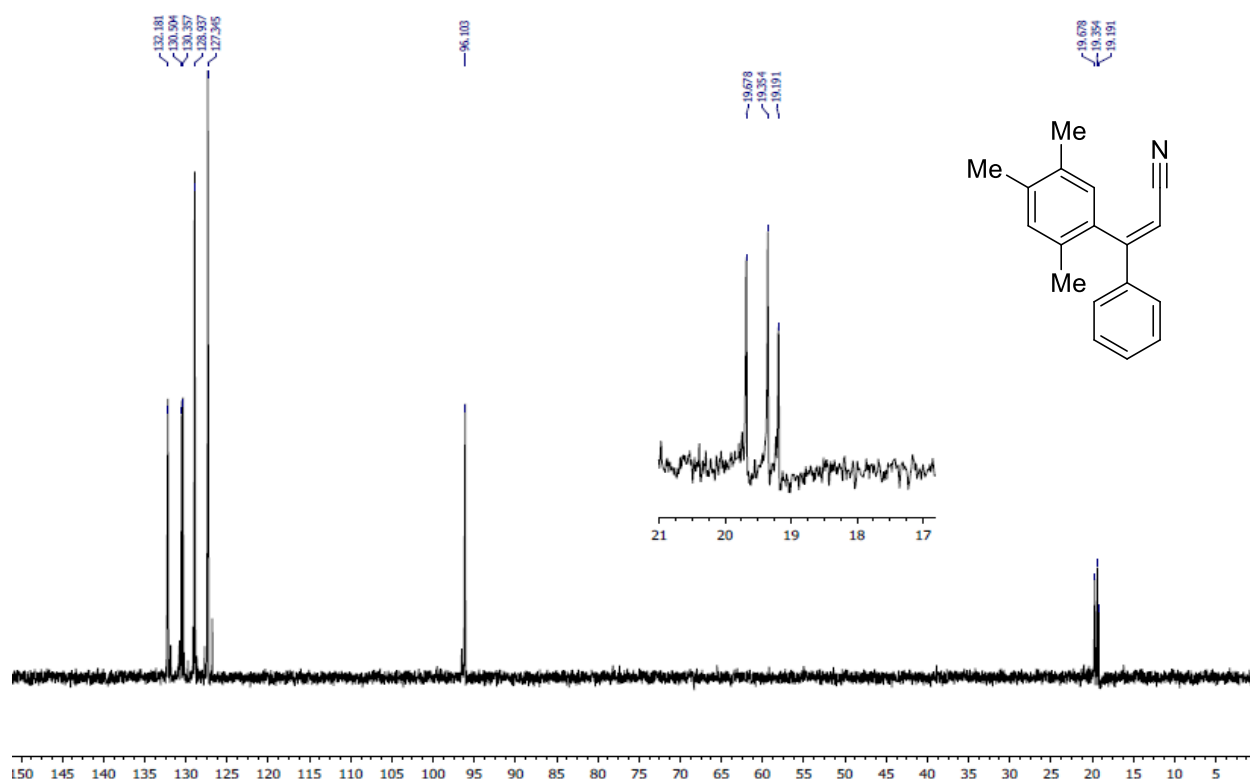

Figure S33. DEPT<sup>135</sup> NMR spectrum of compound **2f** (CDCl<sub>3</sub>, 400 MHz)

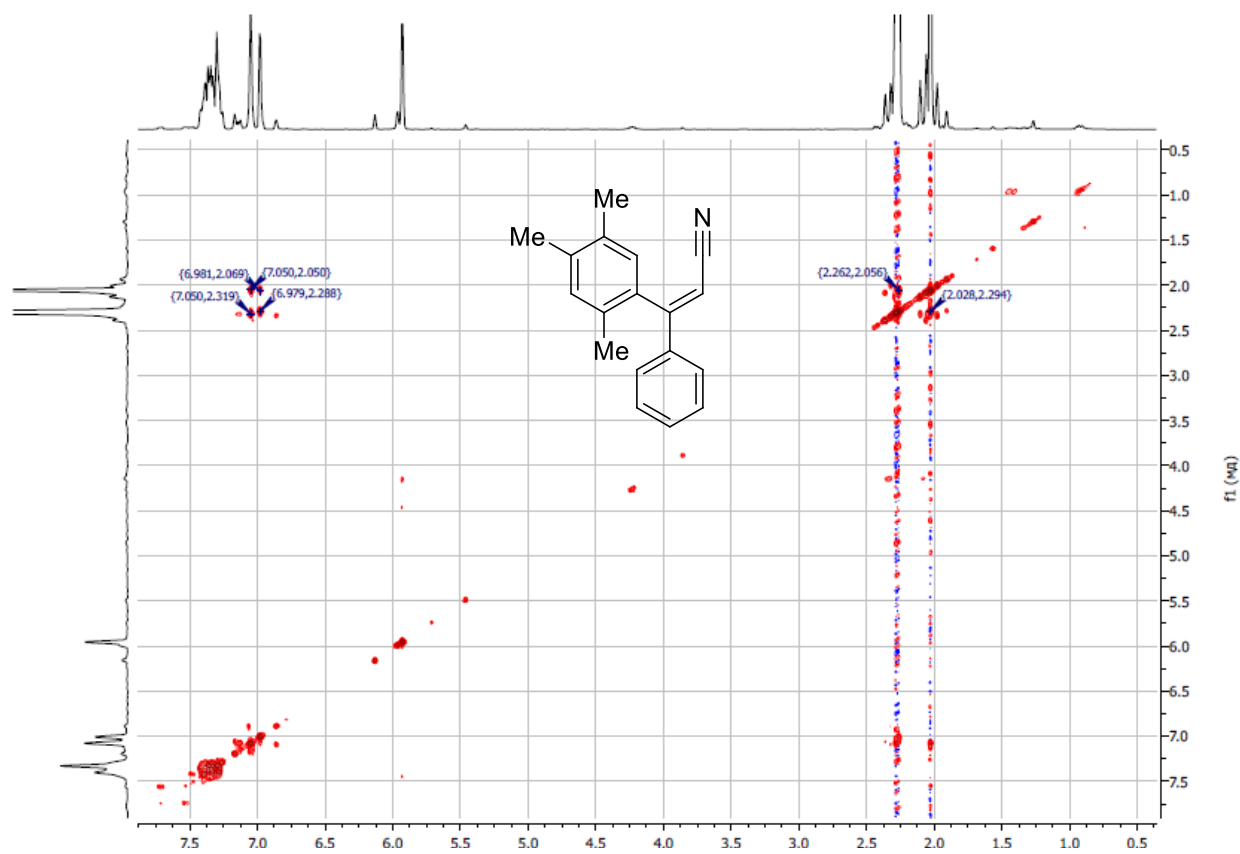

Figure S34. COSY NMR spectrum of compound **2f** (CDCl<sub>3</sub>, 400 MHz).

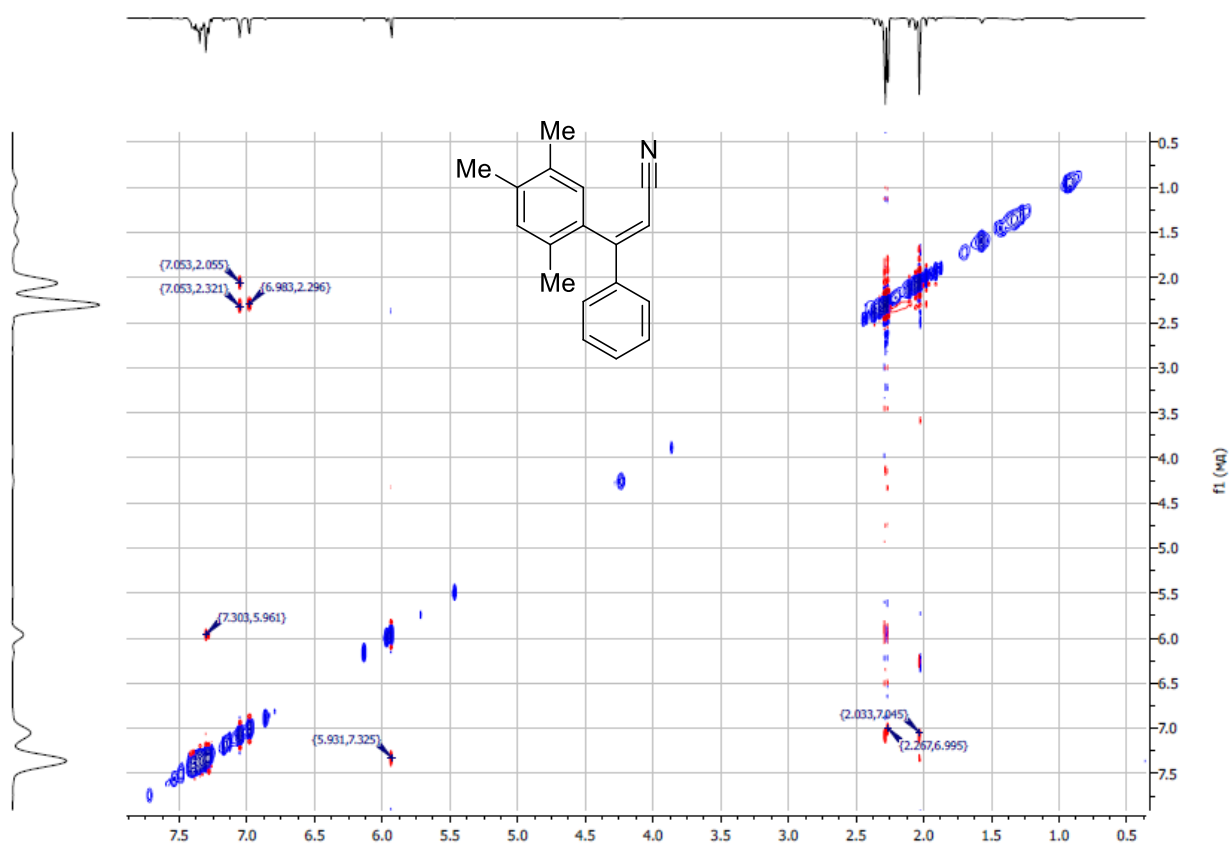

Figure S35. NOESY NMR spectrum of compound **2f** (CDCl<sub>3</sub>, 400 MHz).

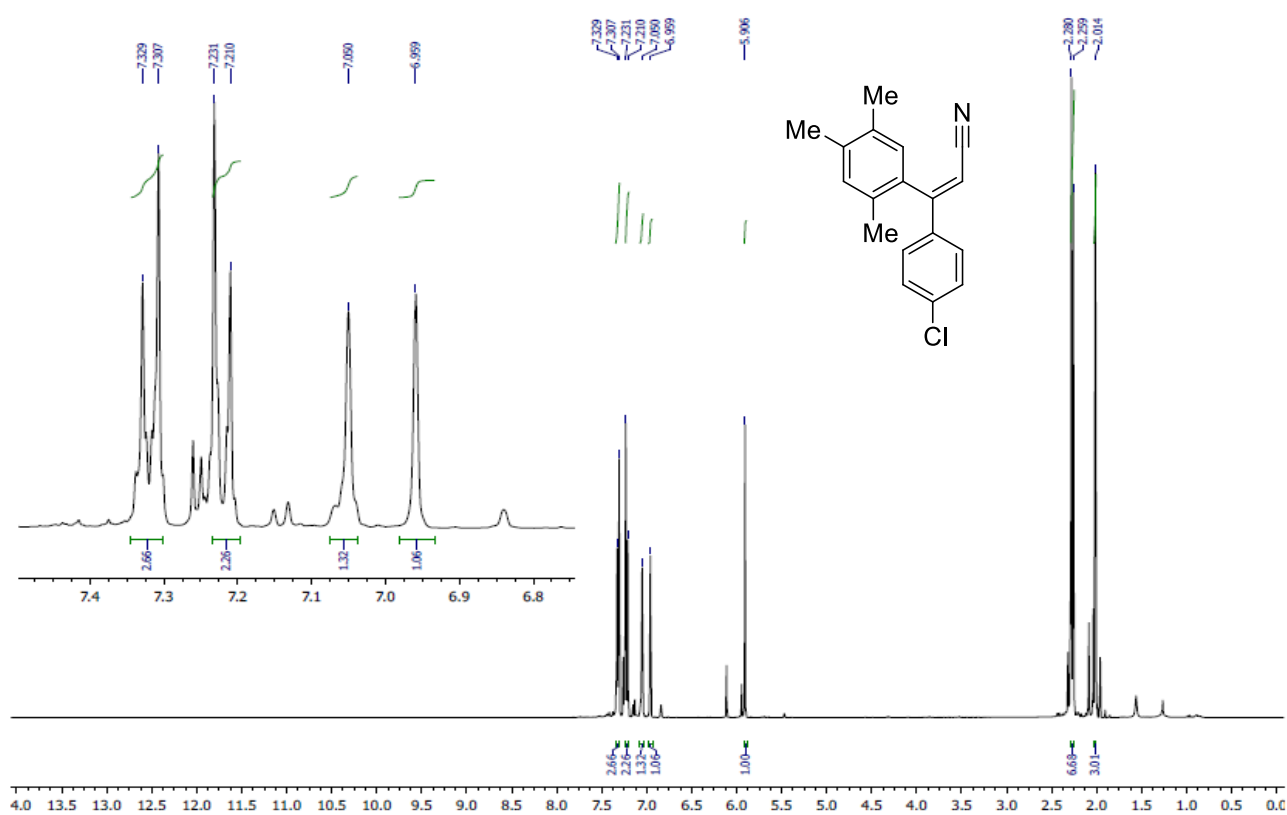

Figure S36. <sup>1</sup>H NMR spectrum of compound **2g** (CDCl<sub>3</sub>, 400 MHz).

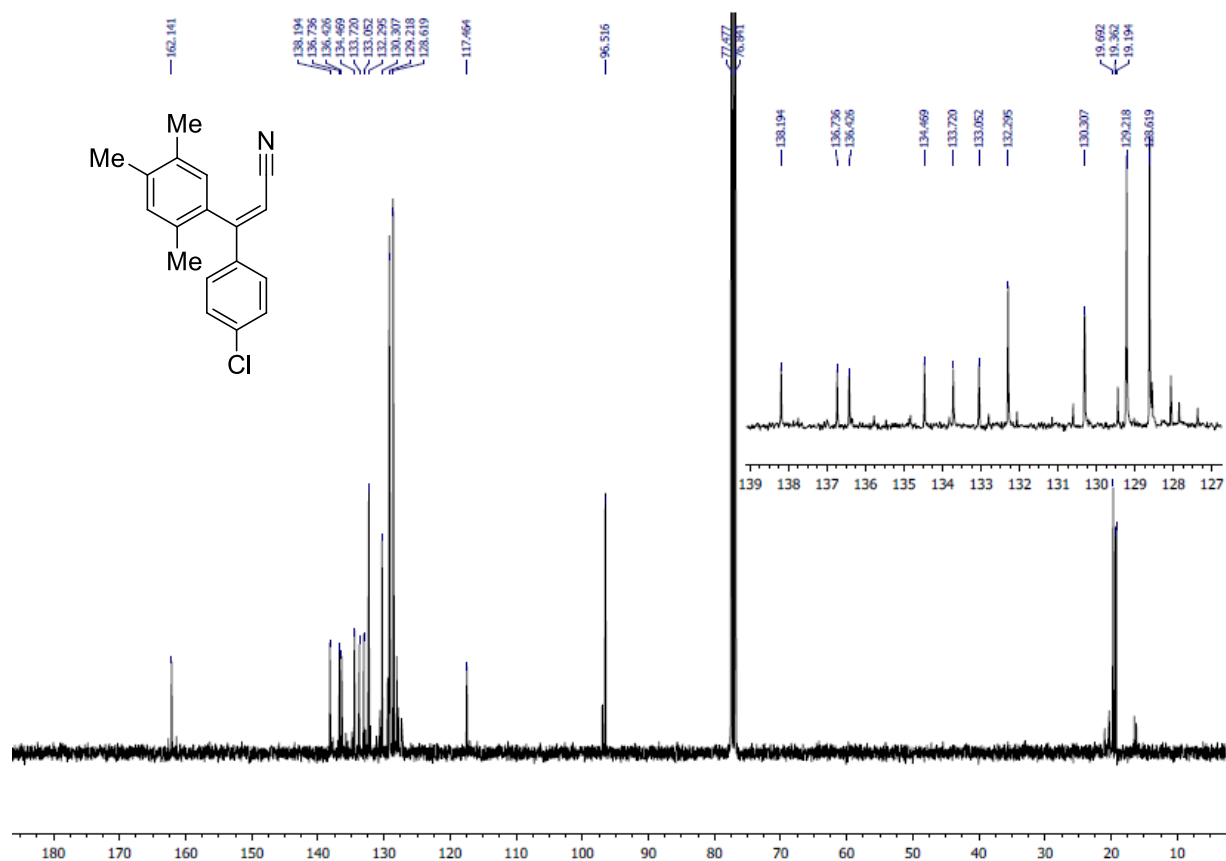

Figure S37. <sup>13</sup>C NMR spectrum of compound **2g** (CDCl<sub>3</sub>, 100 MHz).

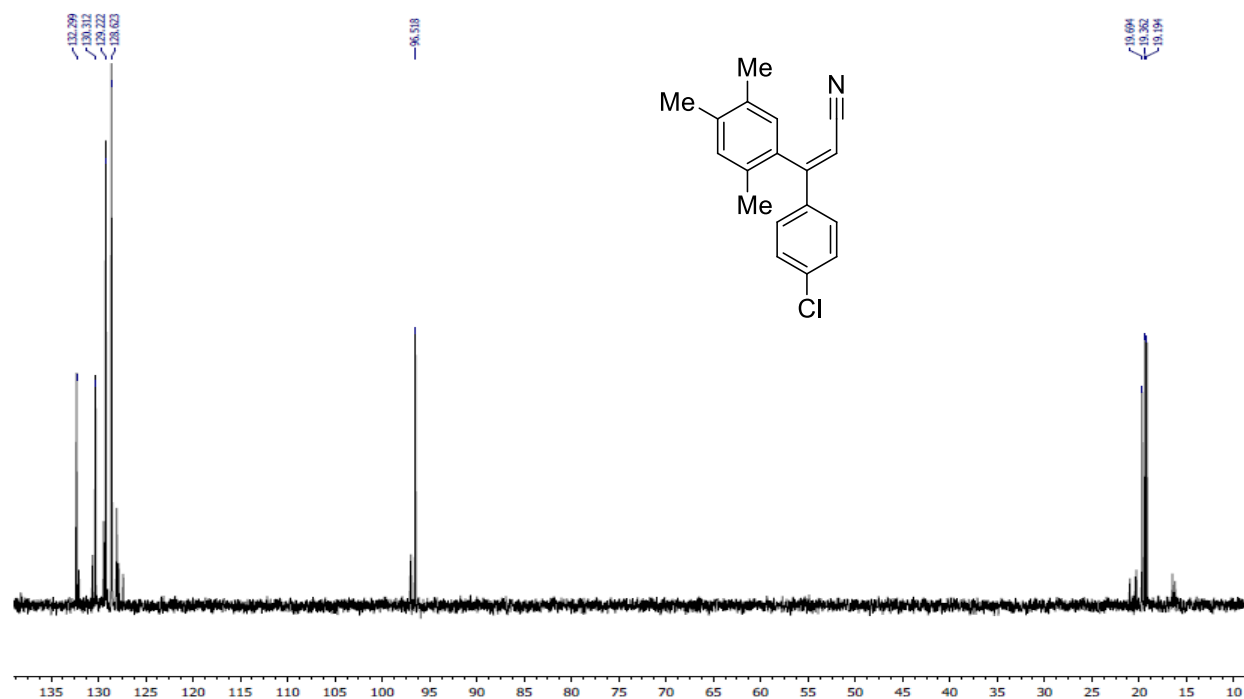

Figure S38. DEPT<sup>135</sup> NMR spectrum of compound **2g** (CDCl<sub>3</sub>, 400 MHz).

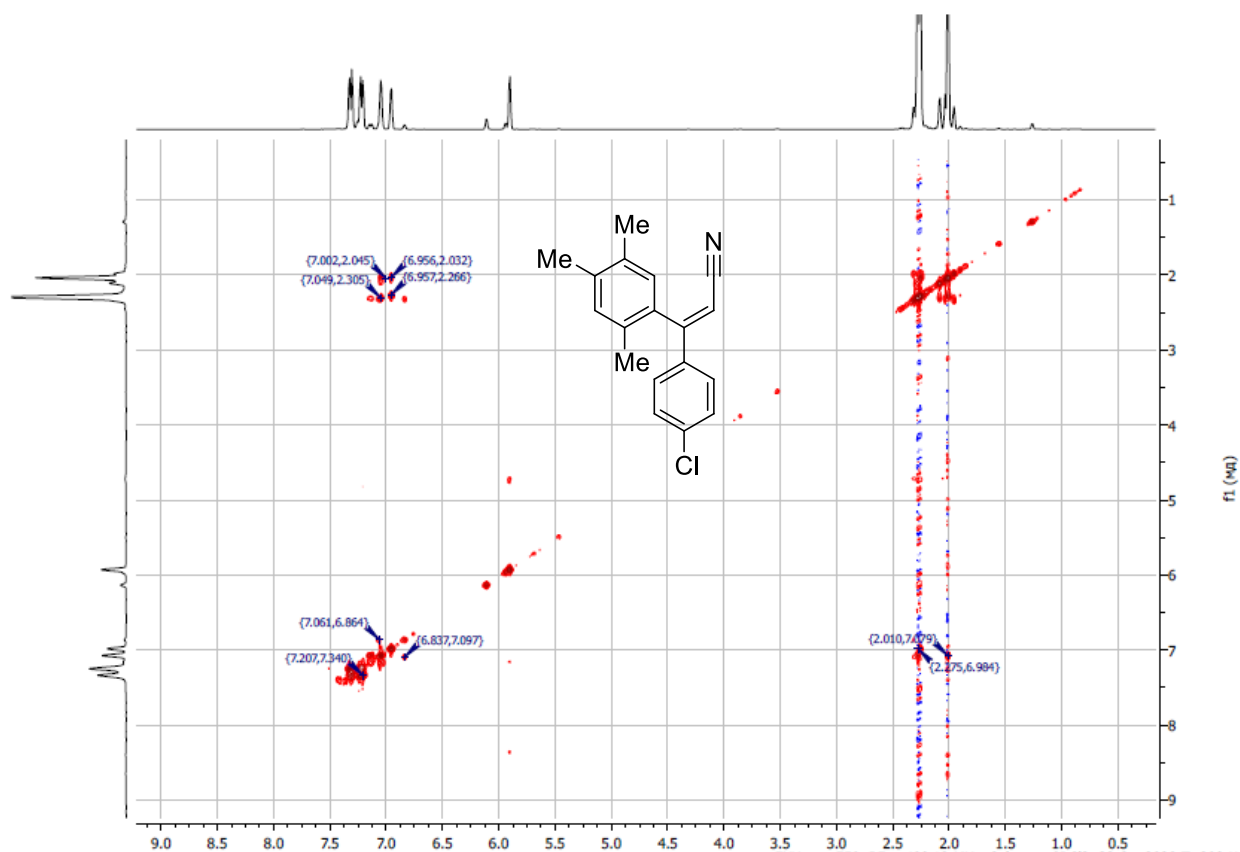

Figure S39. COSY NMR spectrum of compound **2g** (CDCl<sub>3</sub>, 400 MHz).

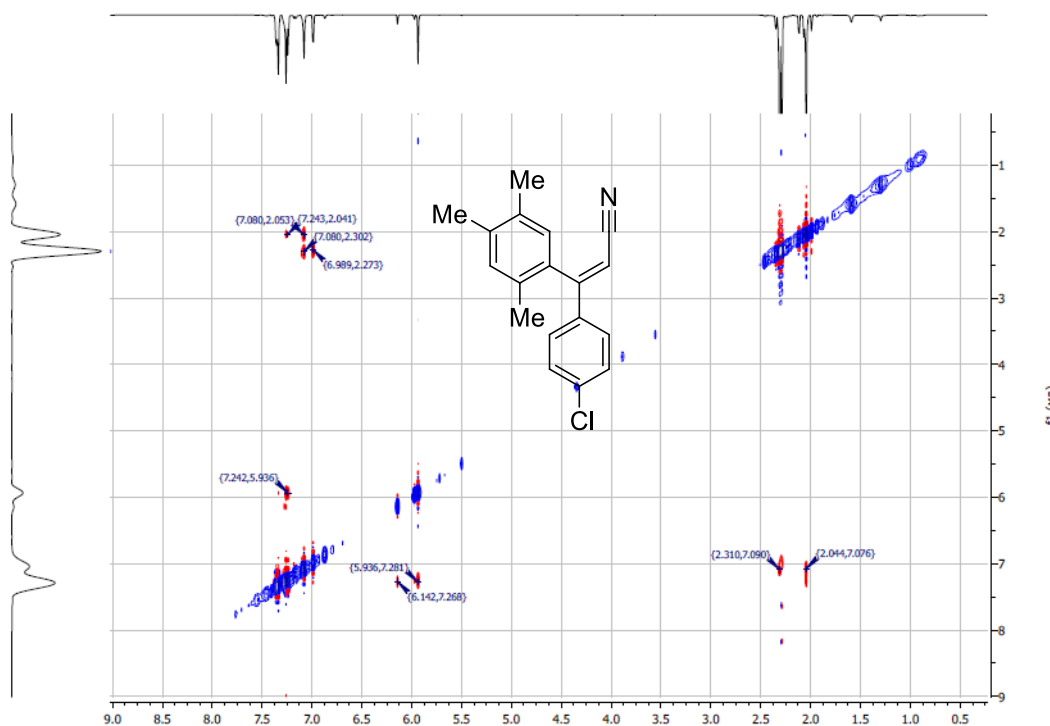

Figure S40. NOESY NMR spectrum of compound **2g** (CDCl<sub>3</sub>, 400 MHz).

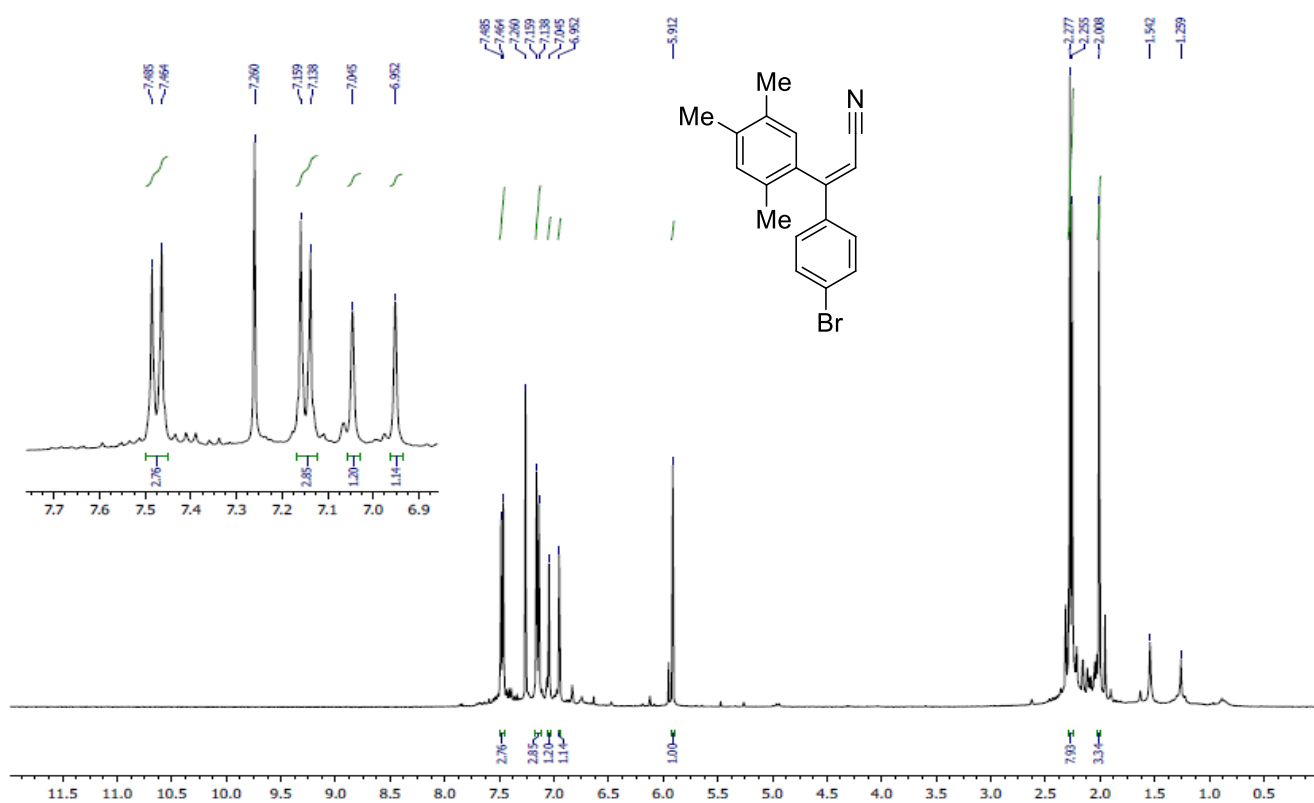

Figure S41. <sup>1</sup>H NMR spectrum of compound **2h** (CDCl<sub>3</sub>, 400 MHz).

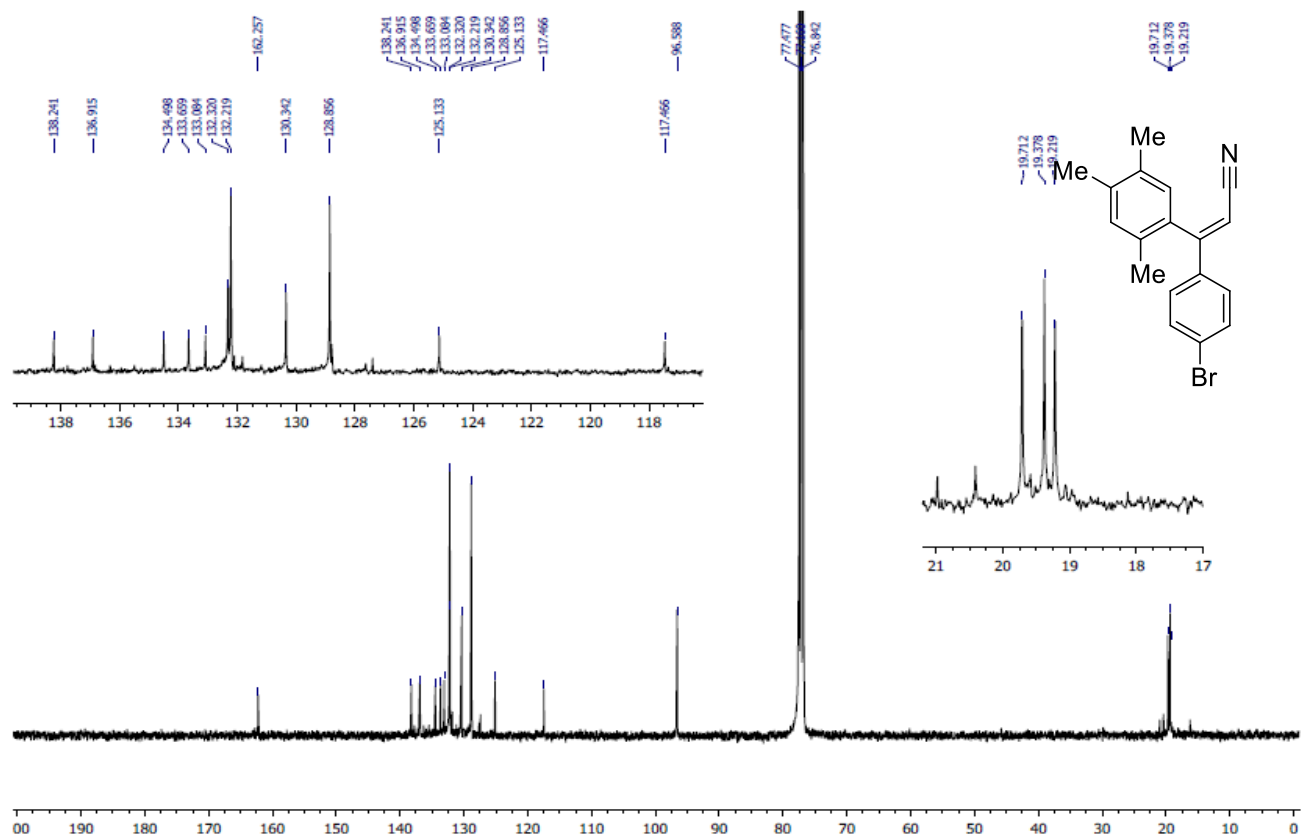

Figure S42. <sup>13</sup>C NMR spectrum of compound **2h** (CDCl<sub>3</sub>, 100 MHz).

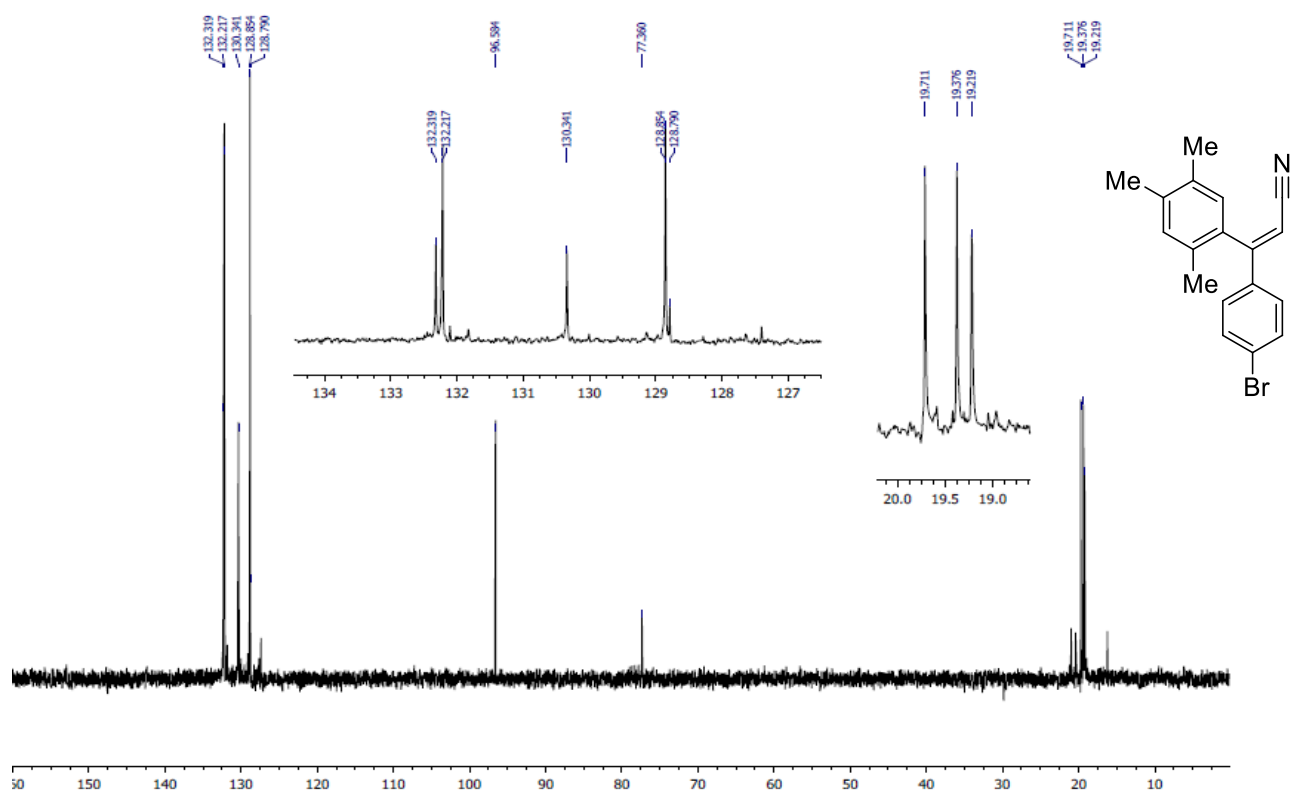

Figure S43. DEPT<sup>135</sup> NMR spectrum of compound **2h** (CDCl<sub>3</sub>, 400 MHz).

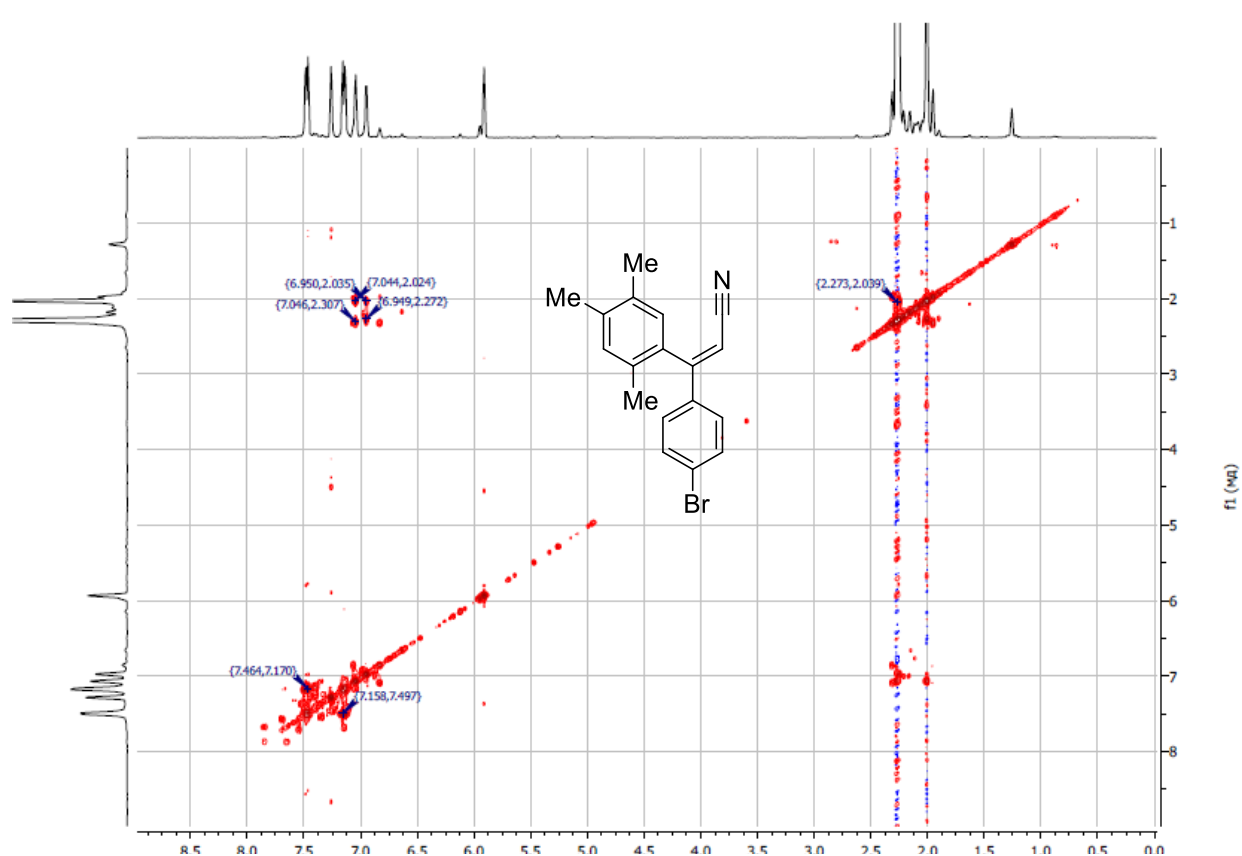

Figure S44. COSY NMR spectrum of compound **2h** (CDCl<sub>3</sub>, 400 MHz).



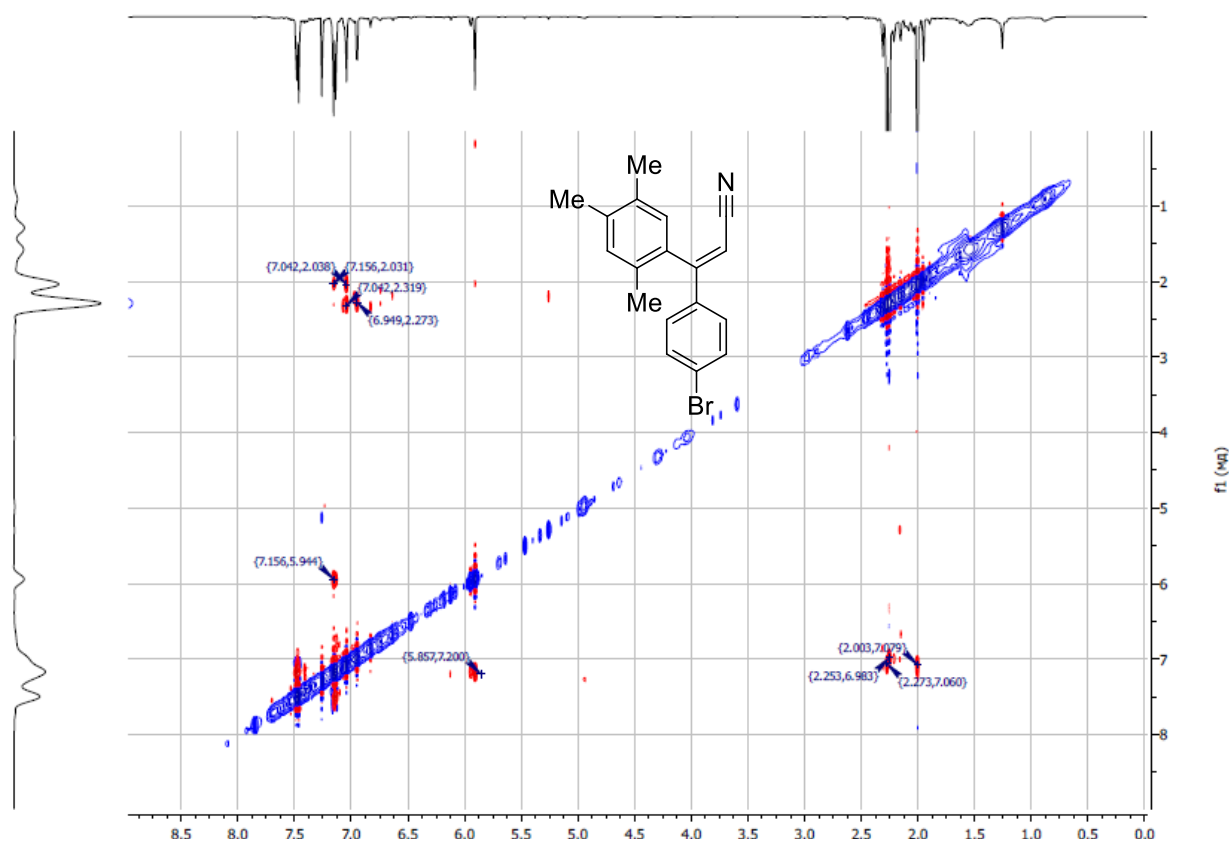

Figure S45. NOESY NMR spectrum of compound **2h** (CDCl<sub>3</sub>, 400 MHz).

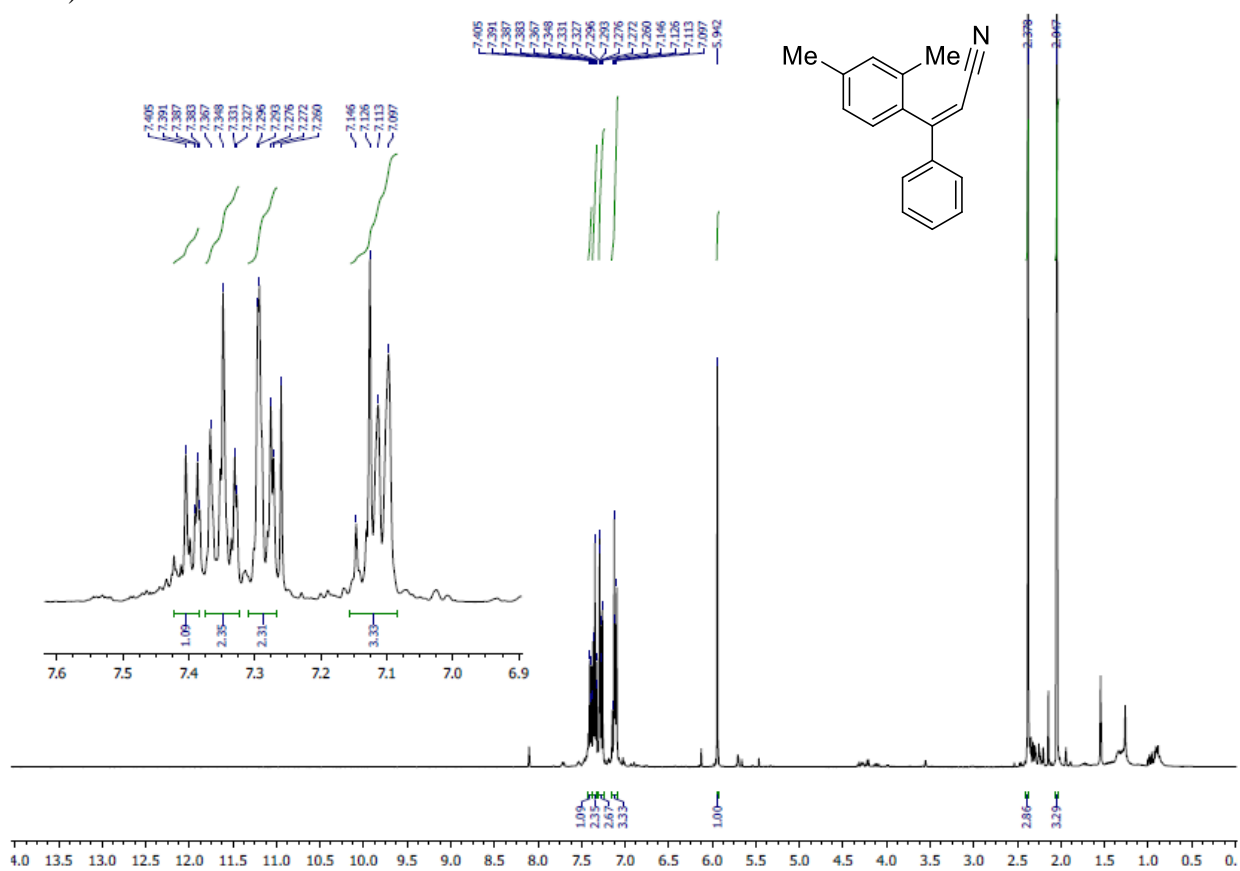

Figure S46. <sup>1</sup>H NMR spectrum of compound **2i** (CDCl<sub>3</sub>, 400 MHz).

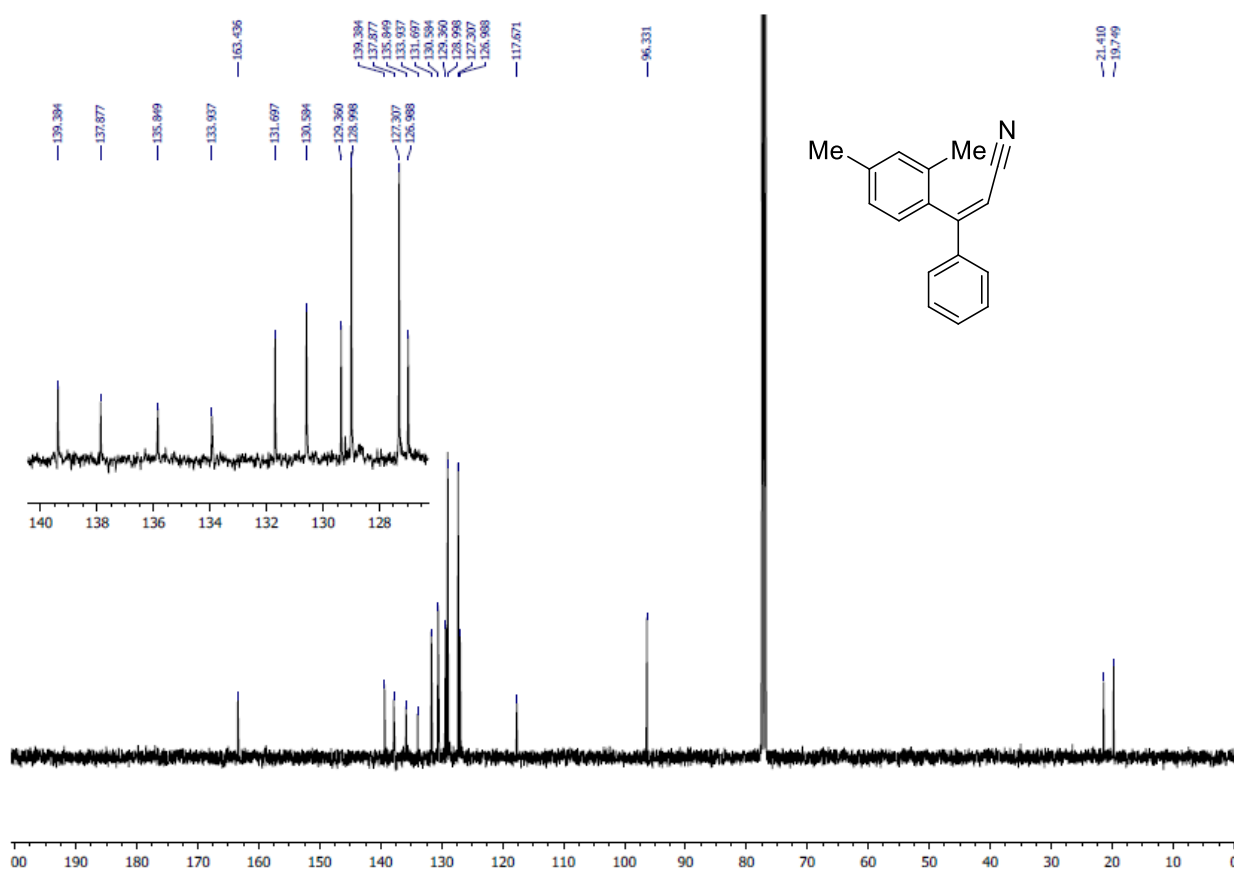

Figure S47. <sup>13</sup>C NMR spectrum of compound **2i** (CDCl<sub>3</sub>, 100 MHz).

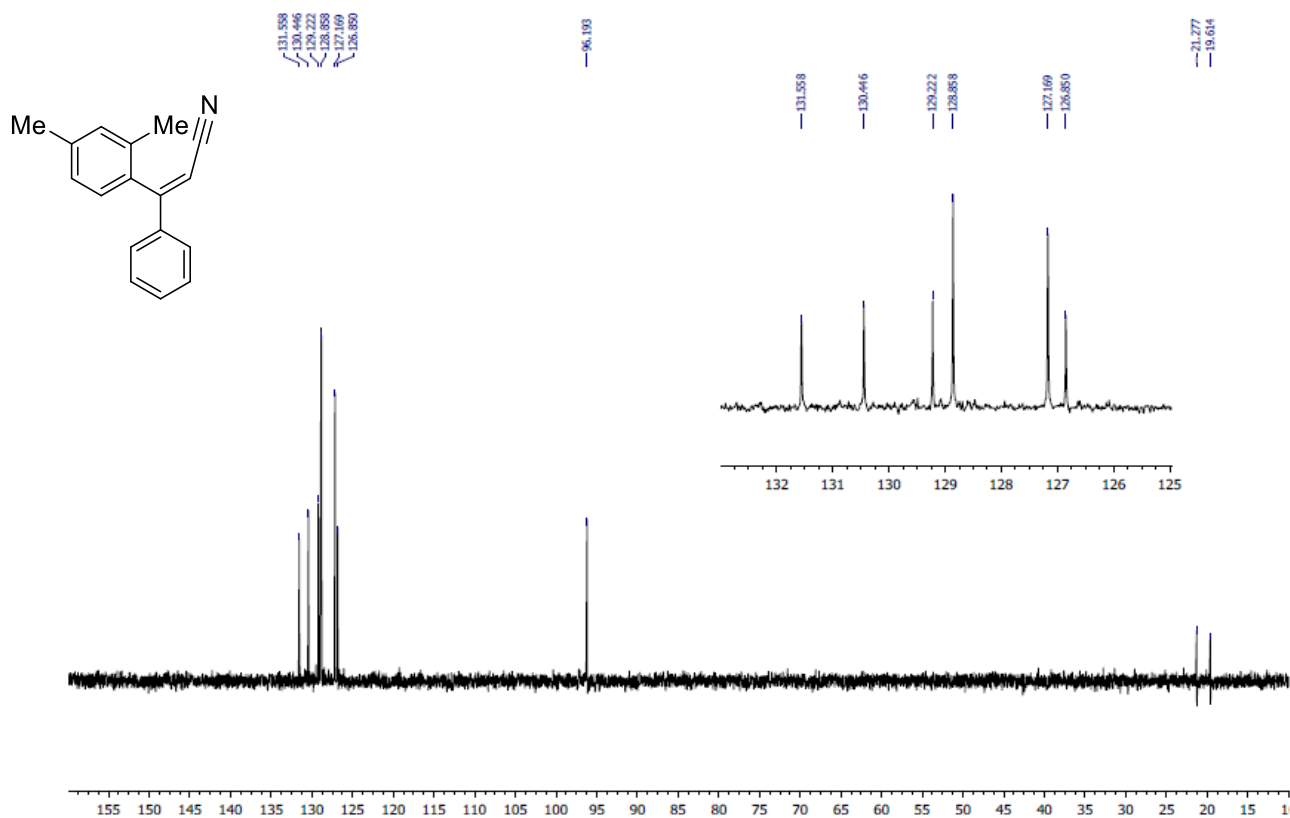

Figure S48. DEPT<sup>135</sup> NMR spectrum of compound **2i** (CDCl<sub>3</sub>, 400 MHz).

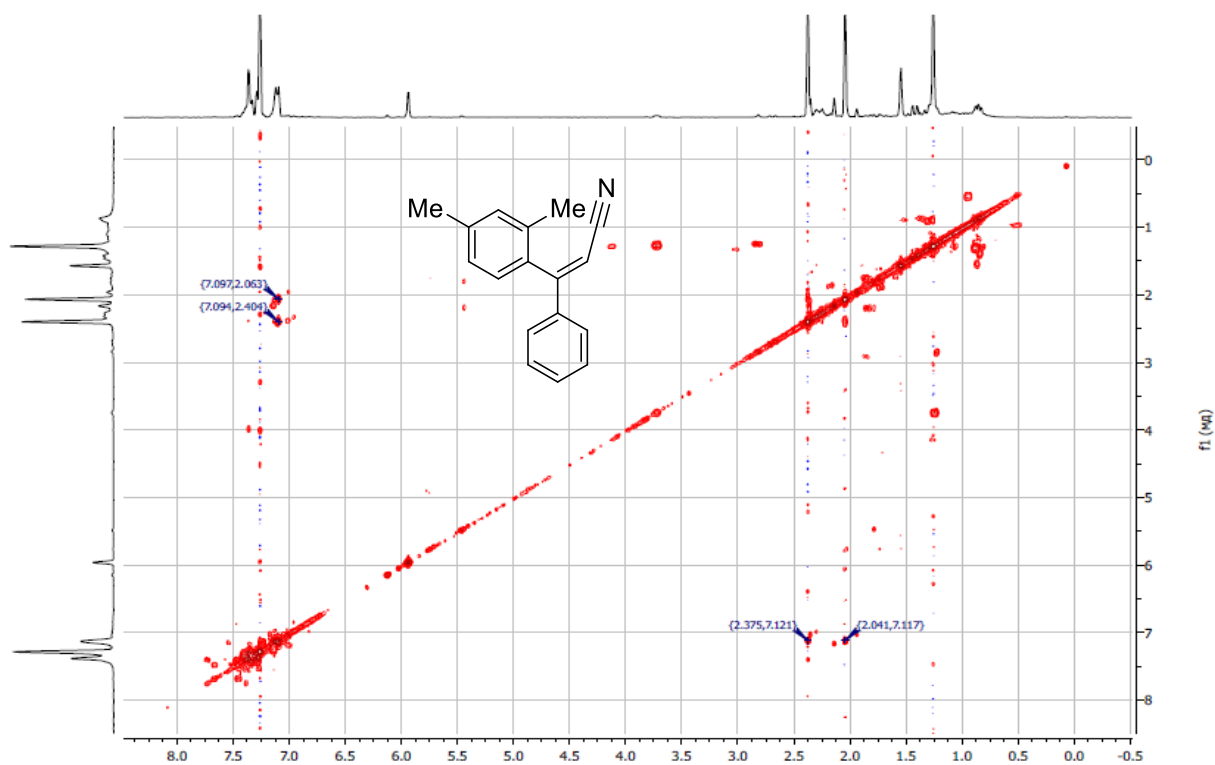

Figure S49. COSY NMR spectrum of compound **2i** (CDCl<sub>3</sub>, 400 MHz).

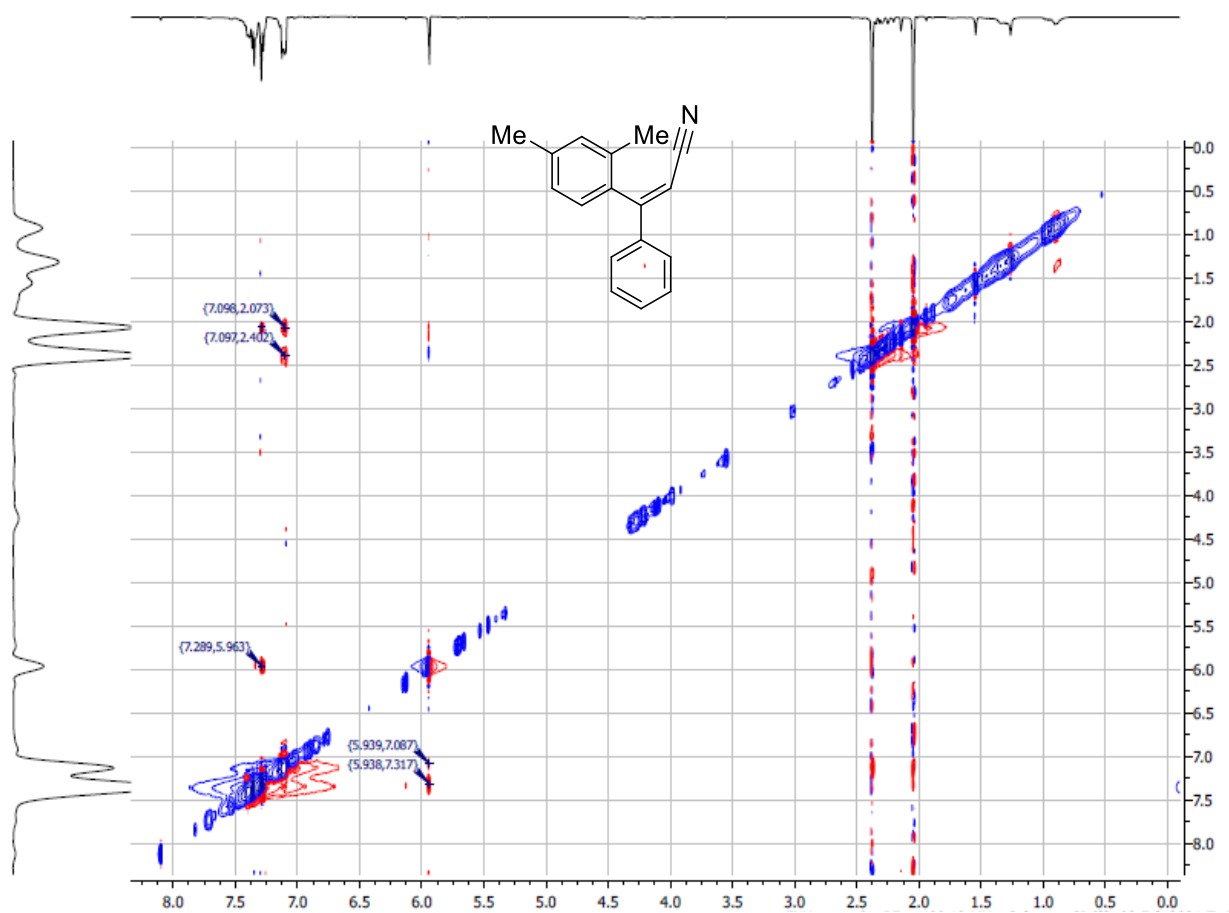

Figure S50. NOESY NMR spectrum of compound **2i** (CDCl<sub>3</sub>, 400 MHz).

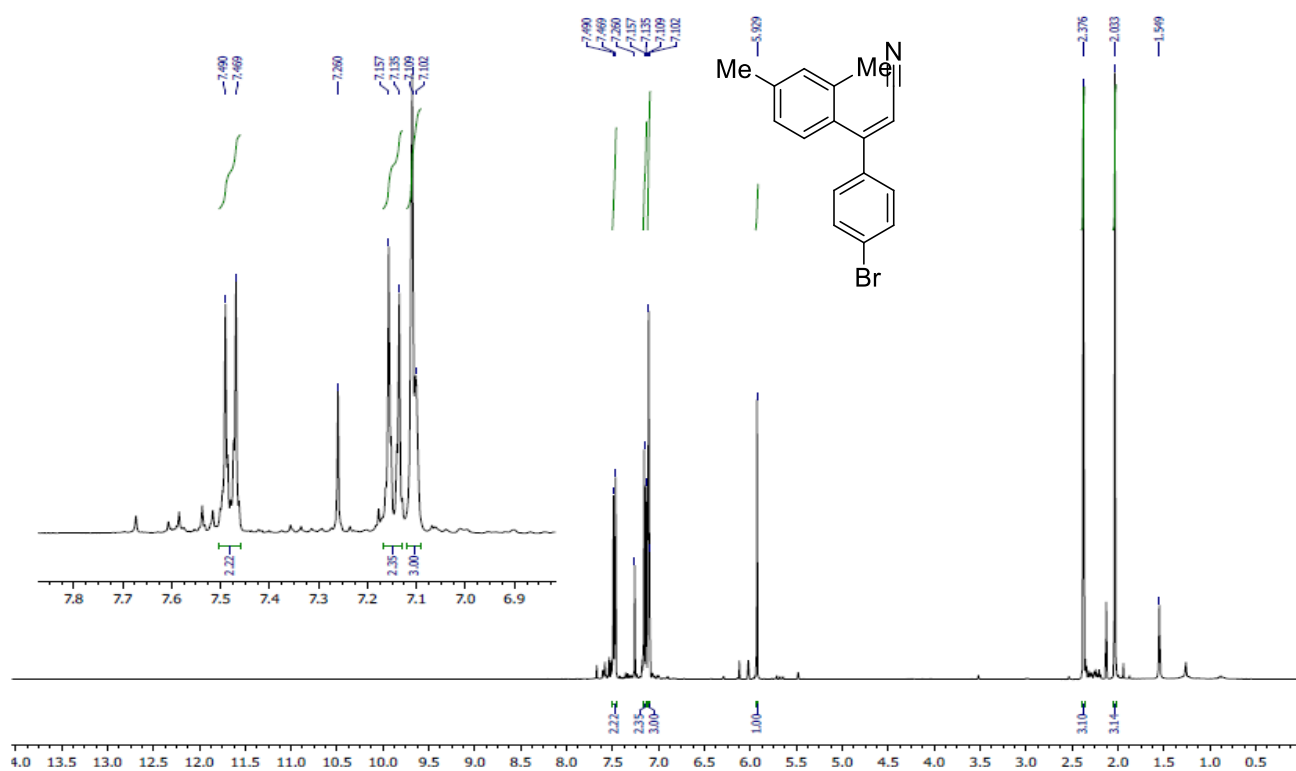

Figure S51. <sup>1</sup>H NMR spectrum of compound **2j** (CDCl<sub>3</sub>, 400 MHz).

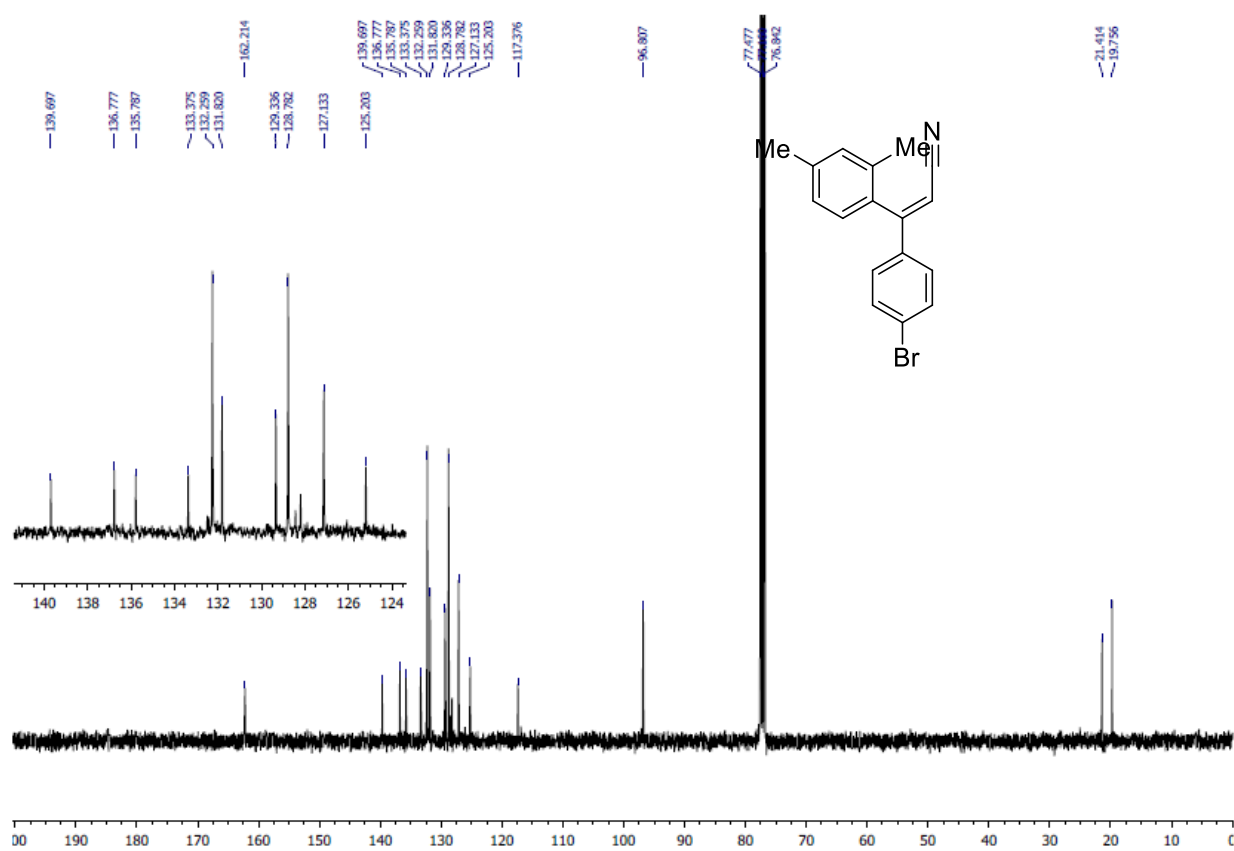

Figure S52. <sup>13</sup>C NMR spectrum of compound **2j** (CDCl<sub>3</sub>, 100 MHz).

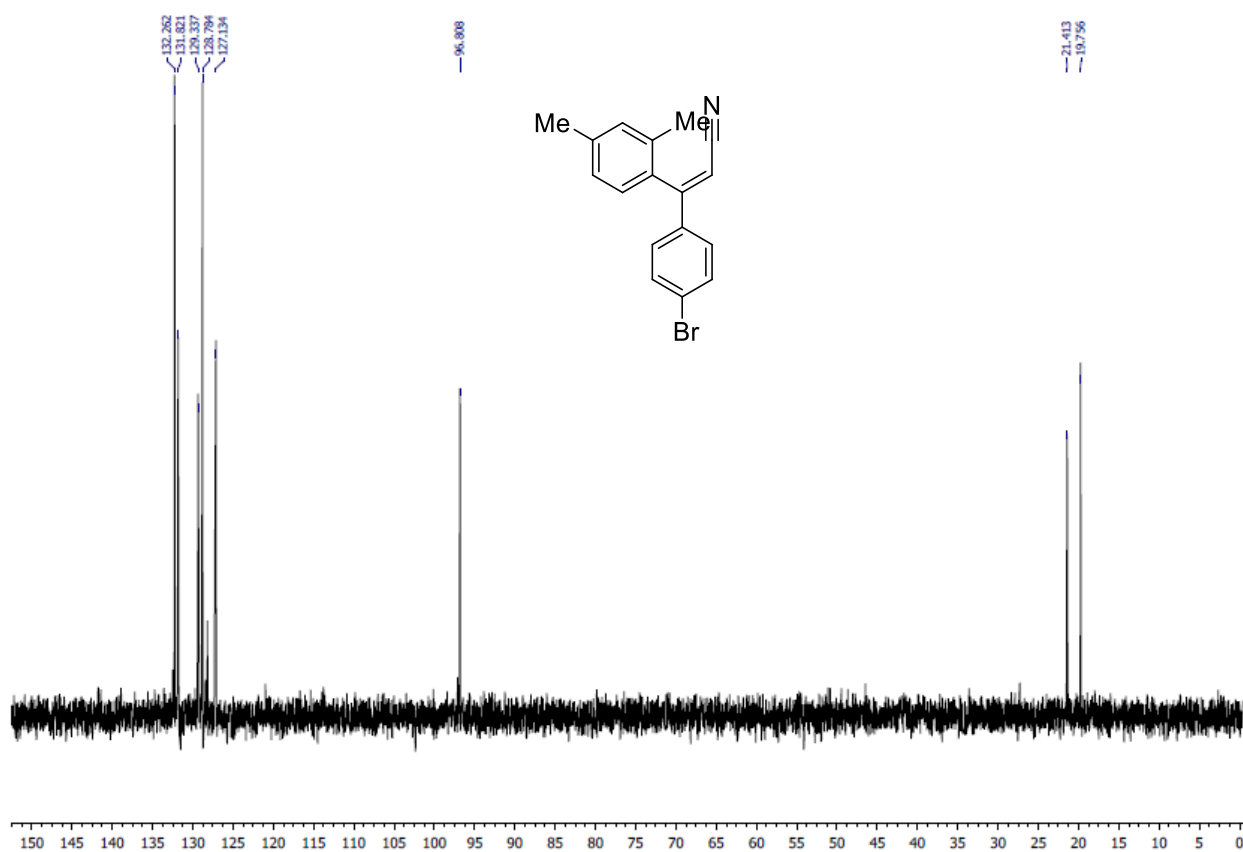

Figure S53. DEPT<sup>135</sup> NMR spectrum of compound **2j** (CDCl<sub>3</sub>, 400 MHz).

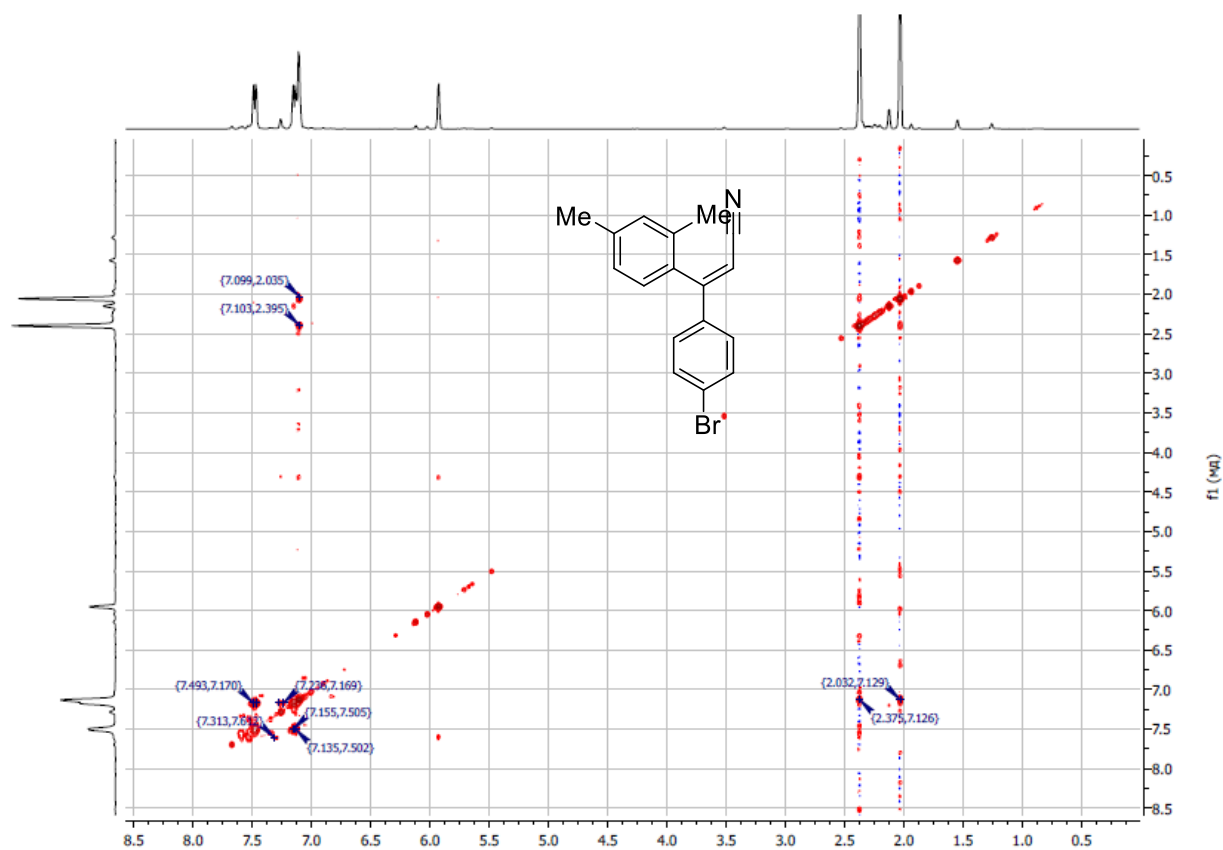

Figure S54. COSY NMR spectrum of compound **2j** (CDCl<sub>3</sub>, 400 MHz).

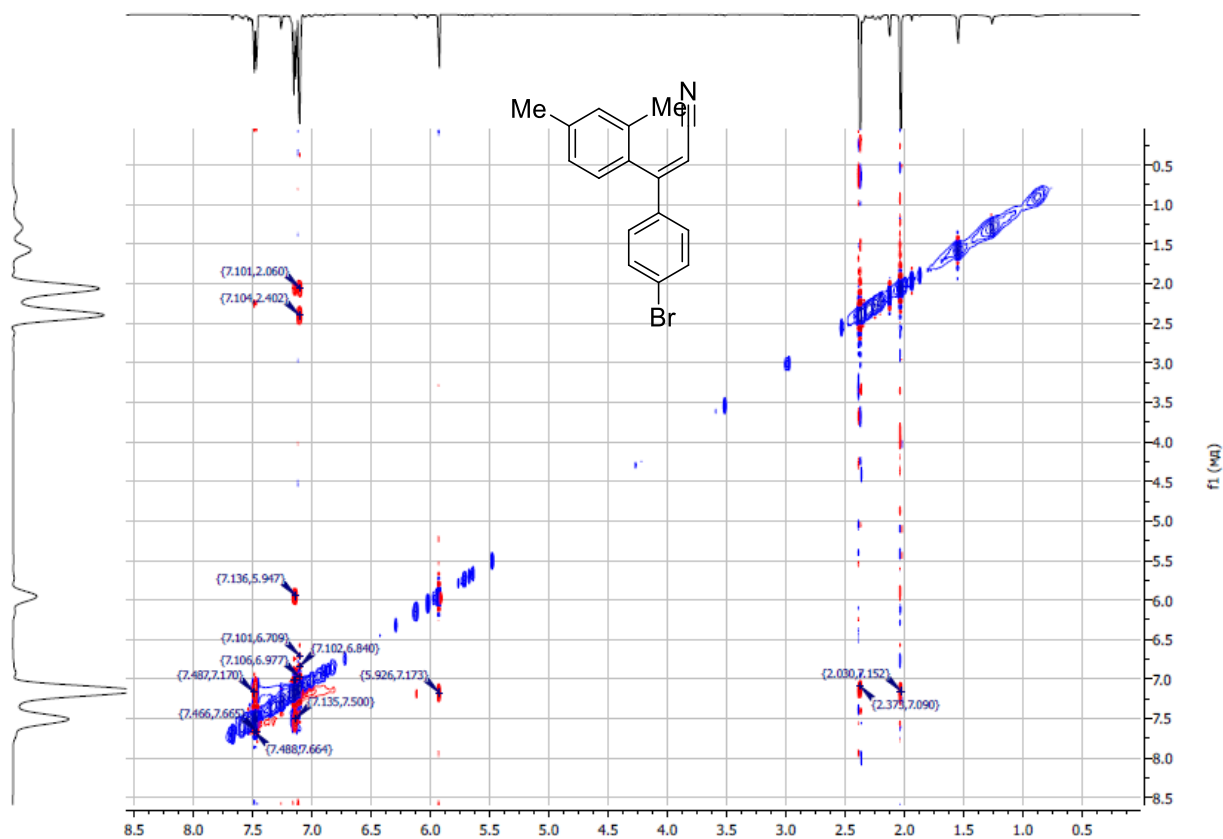

Figure S55. NOESY NMR spectrum of compound **2j** (CDCl<sub>3</sub>, 400 MHz).

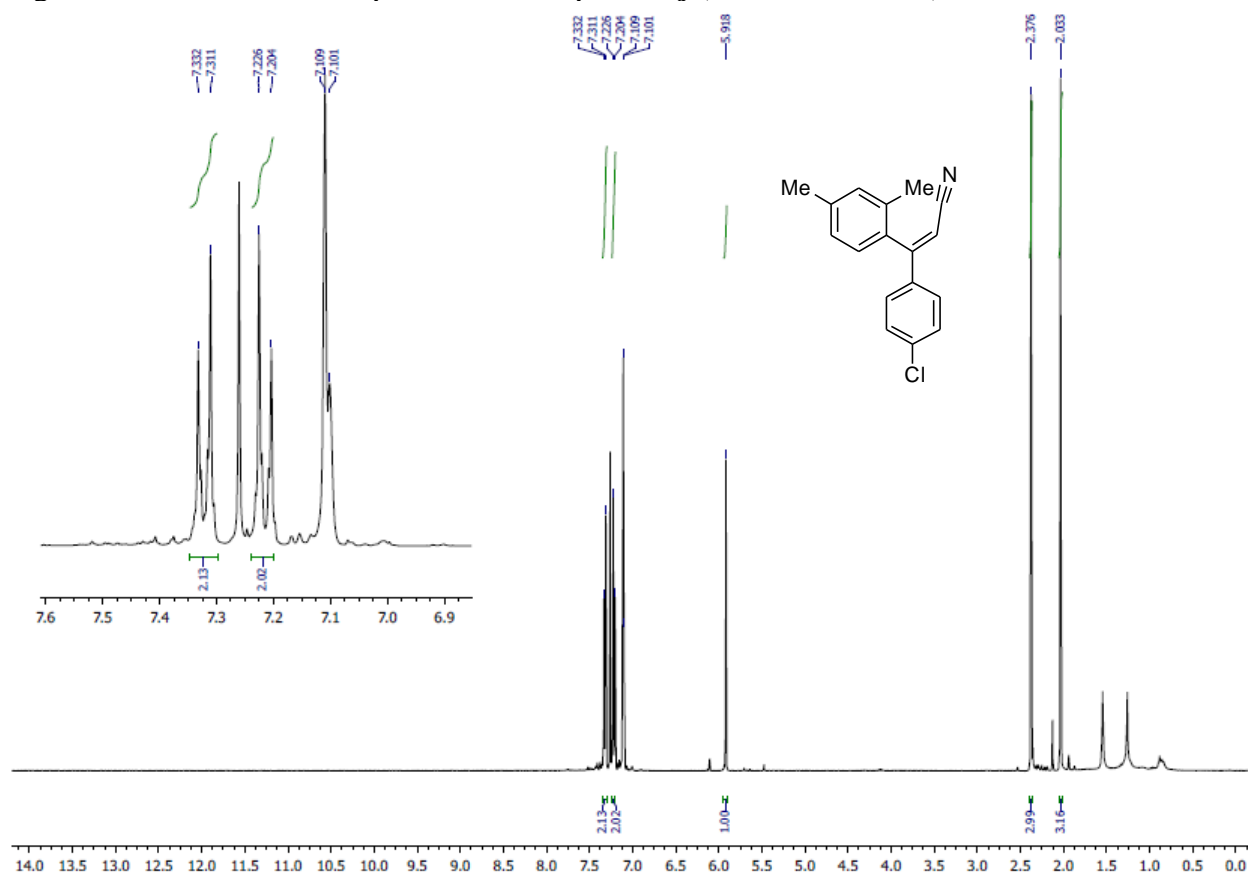

Figure S56. <sup>1</sup>H NMR spectrum of compound **2k** (CDCl<sub>3</sub>, 400 MHz).

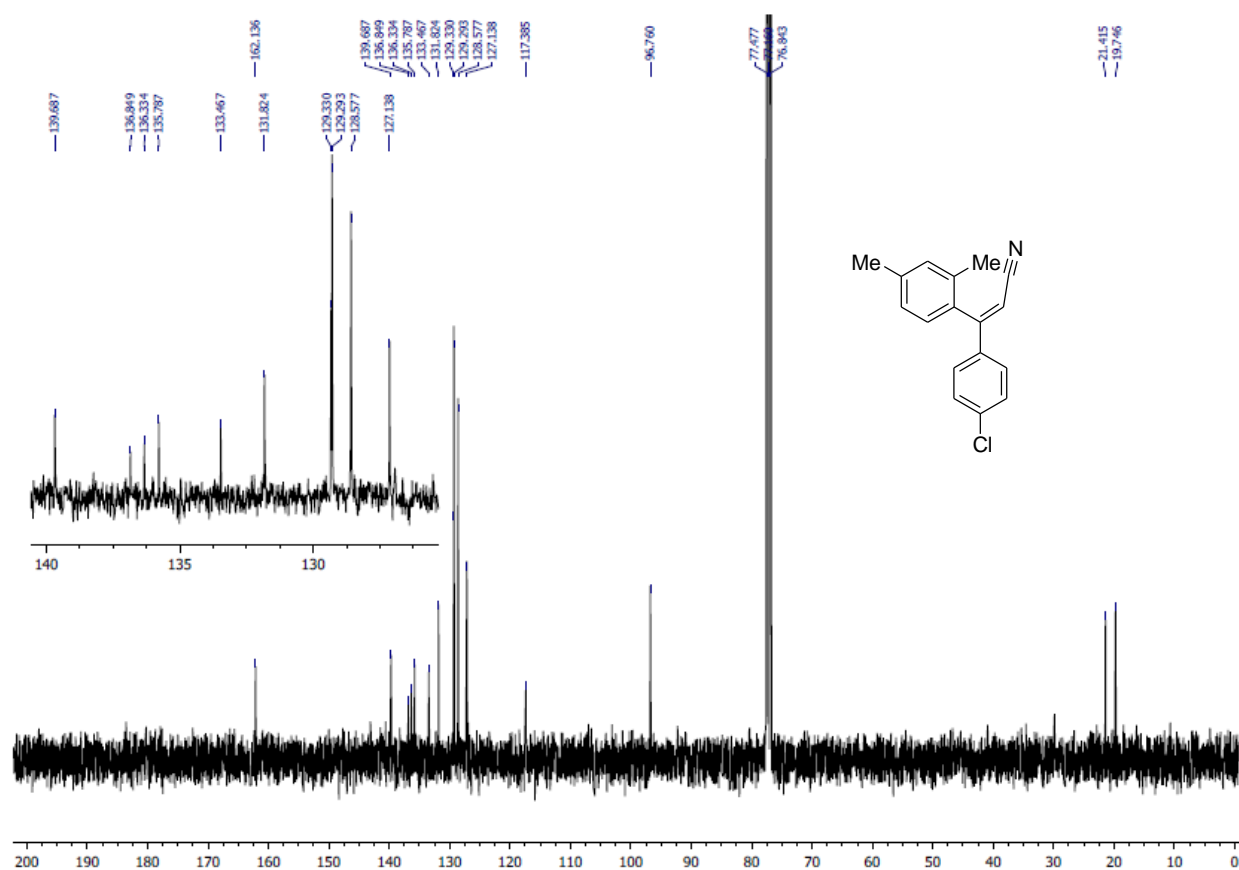

Figure S57. <sup>13</sup>C NMR spectrum of compound **2k** (CDCl<sub>3</sub>, 100 MHz).

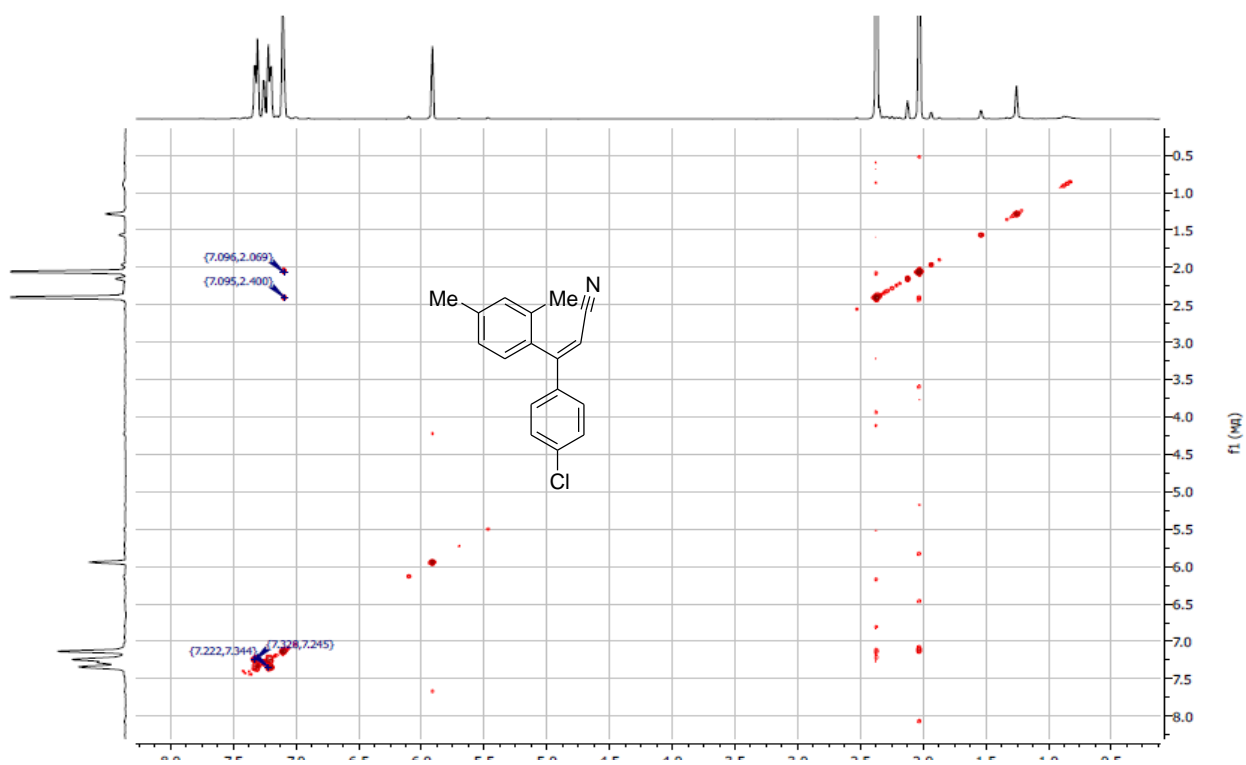

Figure S58. COSY NMR spectrum of compound **2k** (CDCl<sub>3</sub>, 400 MHz).

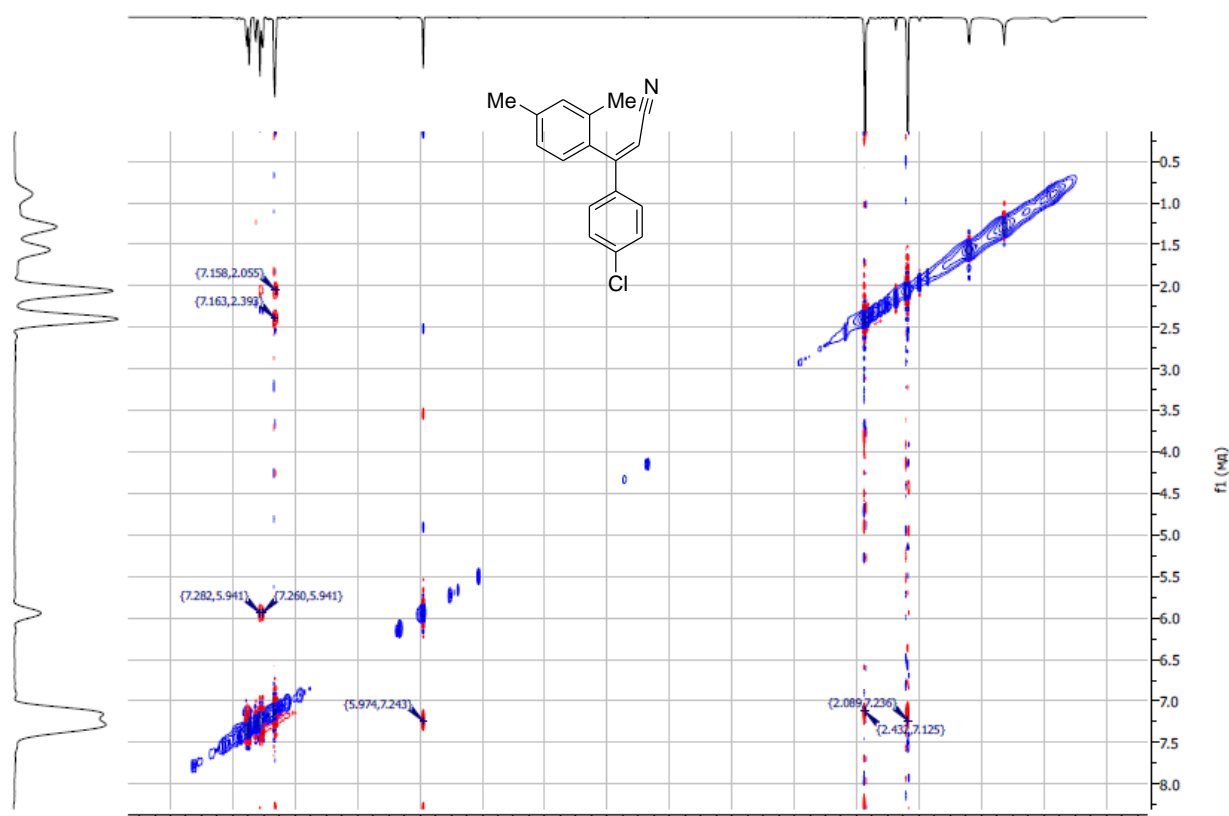

Figure S59. NOESY NMR spectrum of compound **2k** (CDCl<sub>3</sub>, 400 MHz).

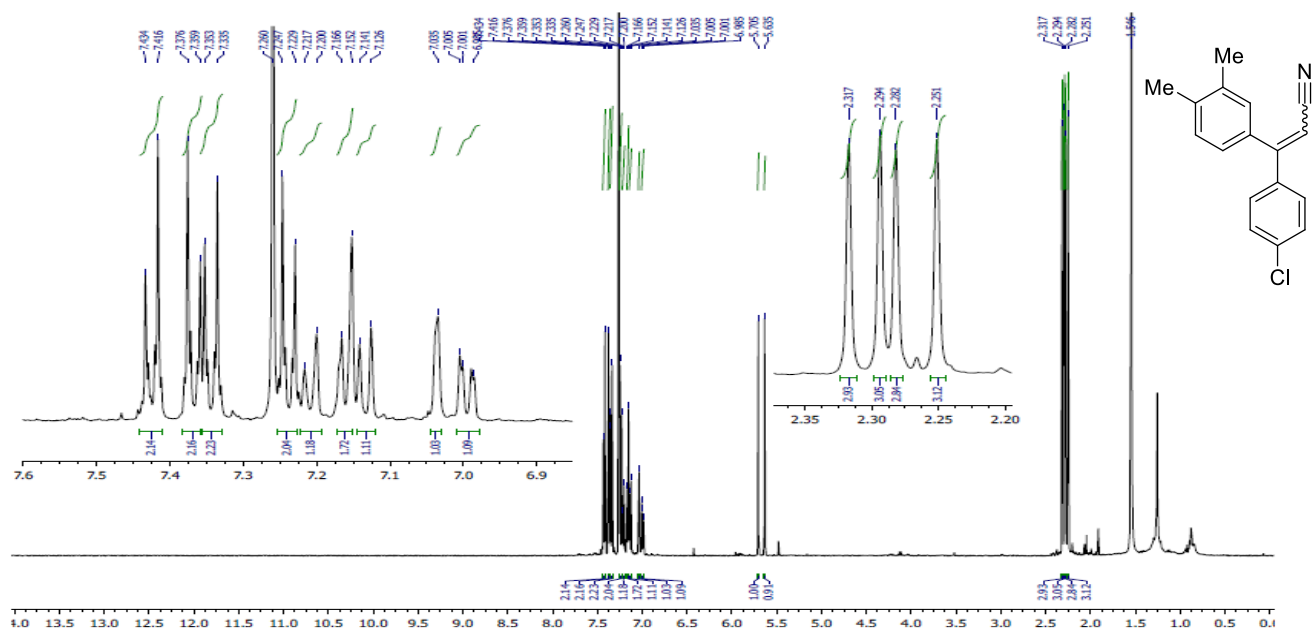



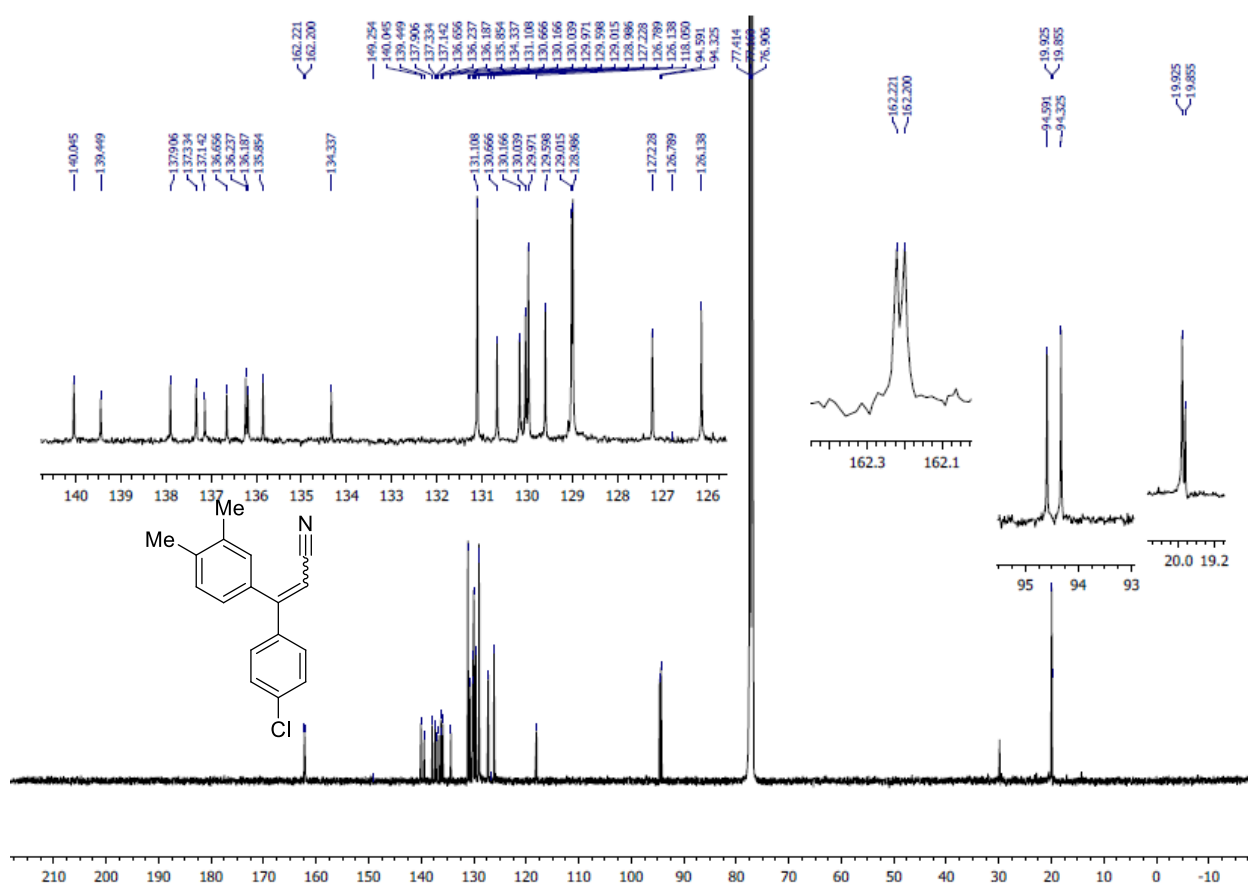

Figure S61. <sup>13</sup>C NMR spectrum of mixture of compounds *E,Z*-**2I** (CDCl<sub>3</sub>, 100 MHz).

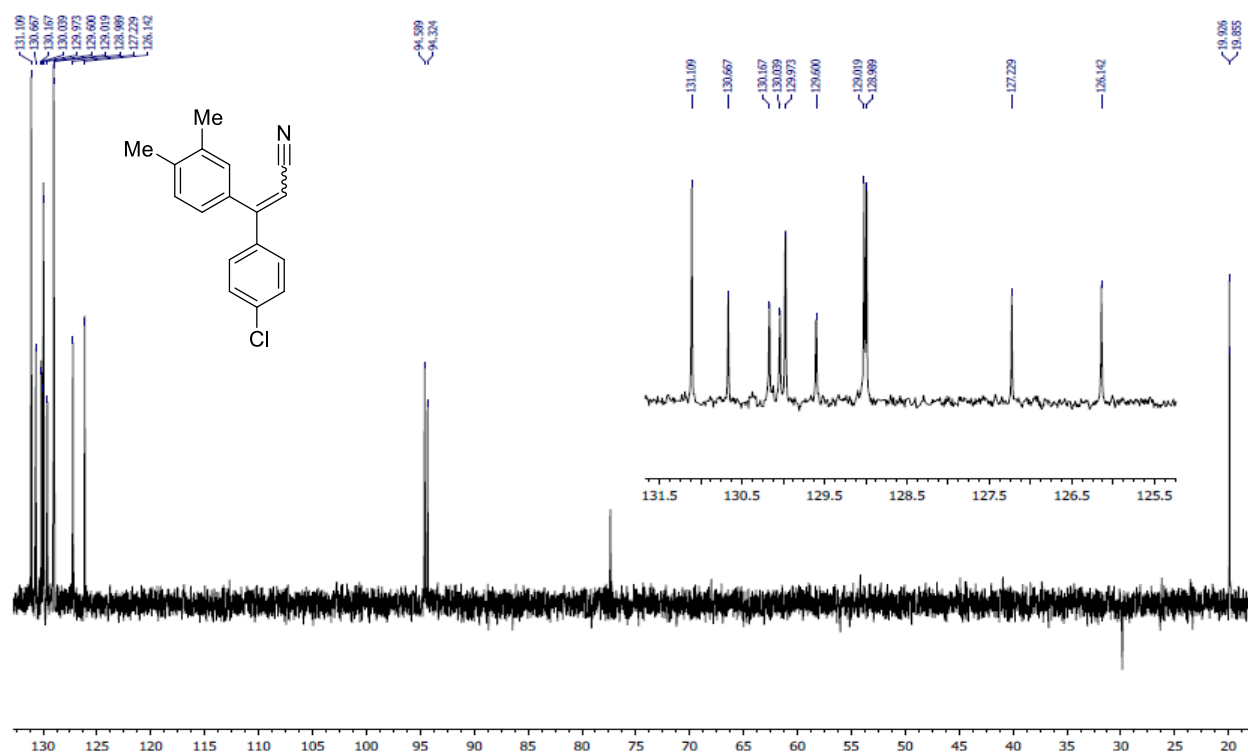

Figure S62. DEPT<sup>135</sup> NMR spectrum of mixture of compounds *E,Z*-**2I** (CDCl<sub>3</sub>, 400 MHz).

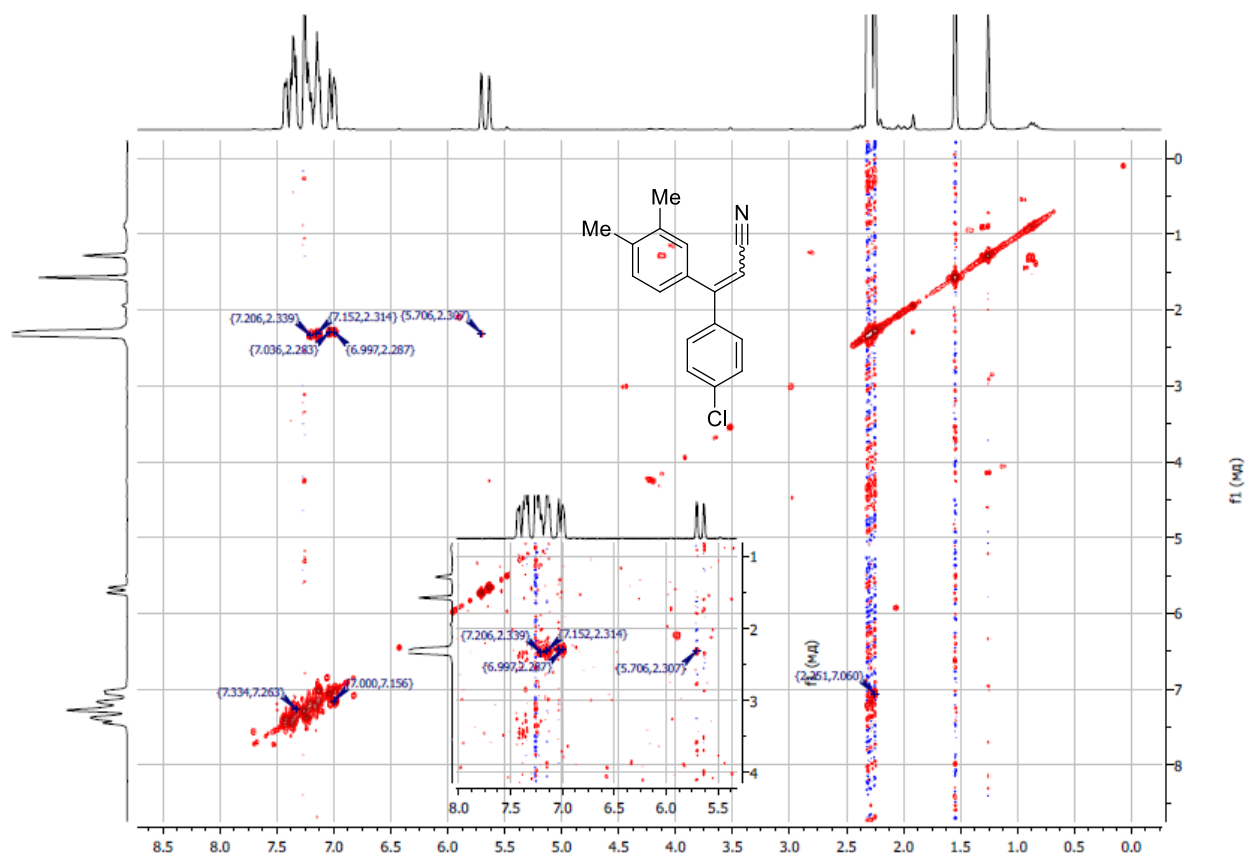

Figure S63. COSY NMR spectrum of mixture of compounds *E,Z*-**2I** (CDCl<sub>3</sub>, 400 MHz).

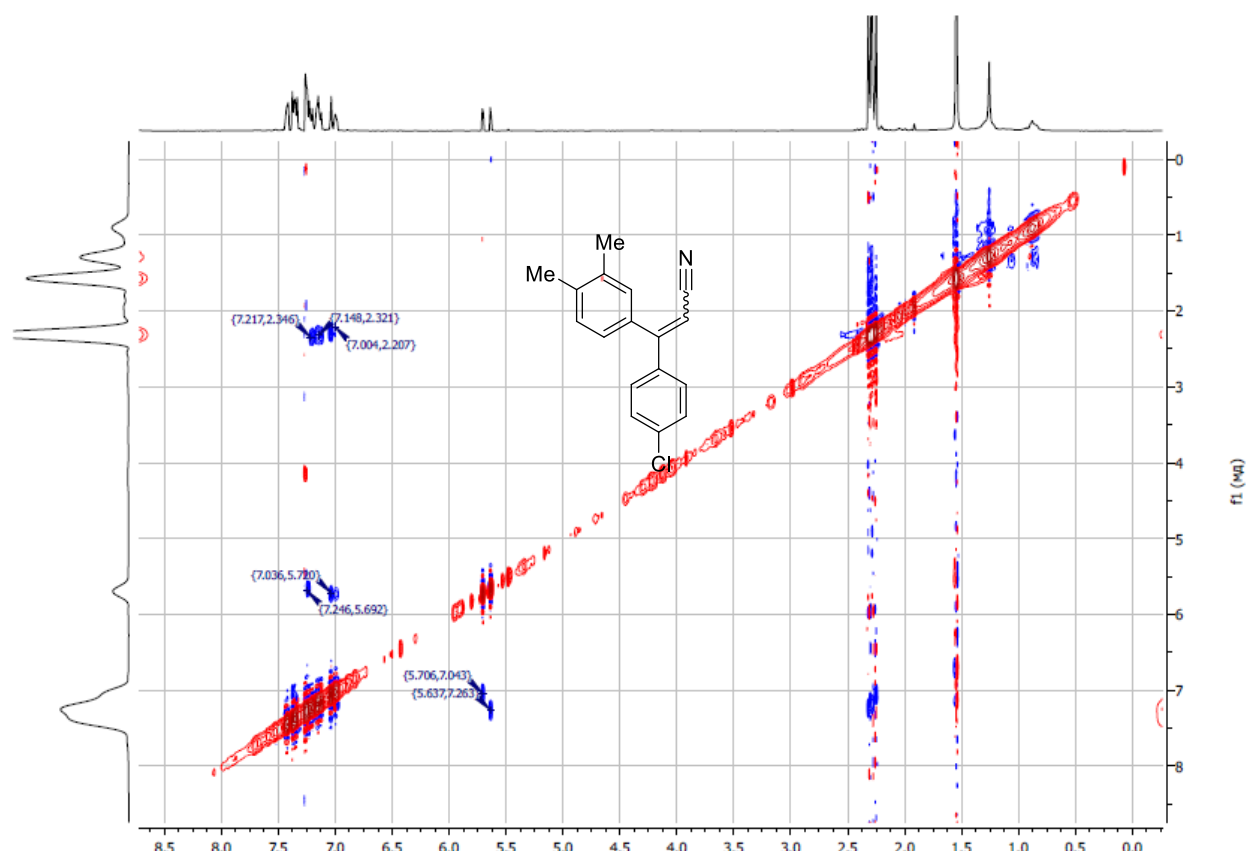

Figure S64. NOESY NMR spectrum of mixture of compounds *E,Z*-**2I** (CDCl<sub>3</sub>, 400 MHz).

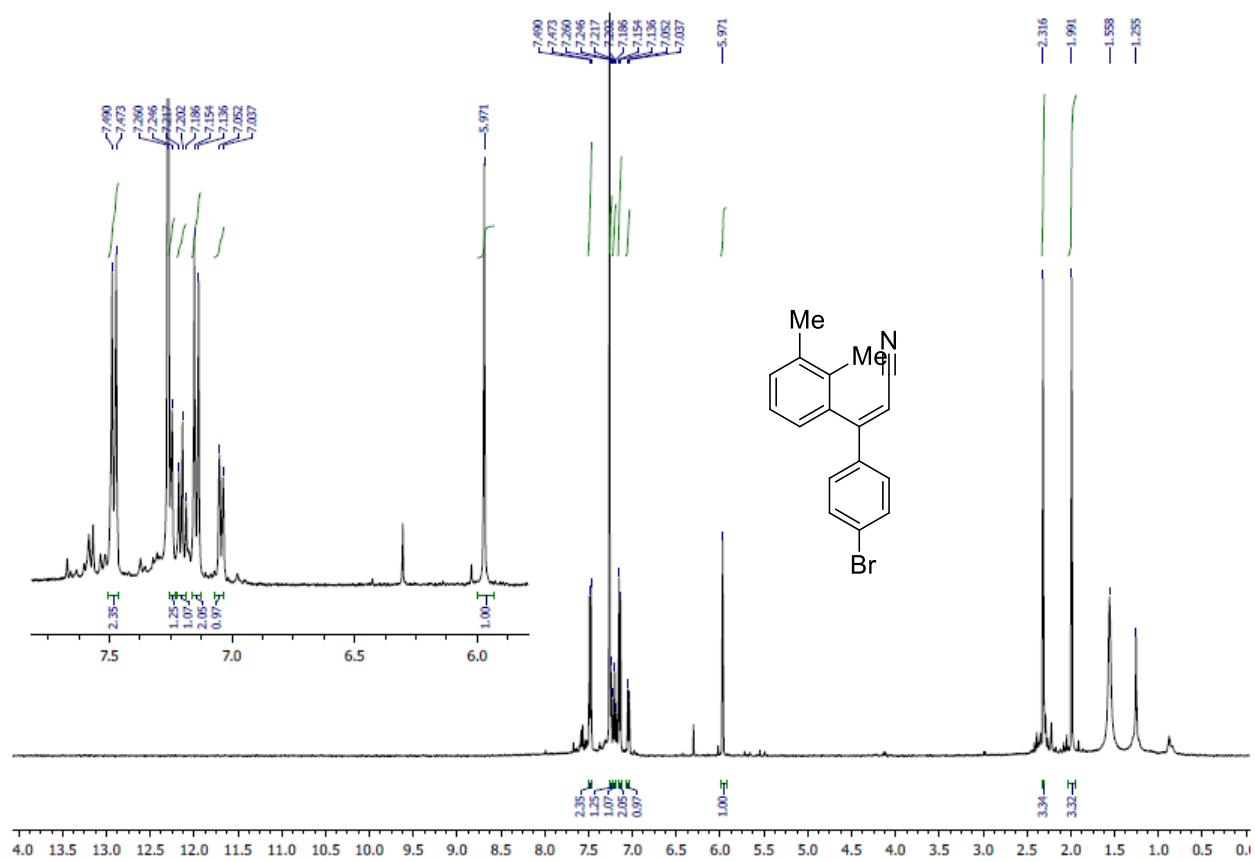

Figure S65. <sup>1</sup>H NMR spectrum of compound **2m** (CDCl<sub>3</sub>, 400 MHz).

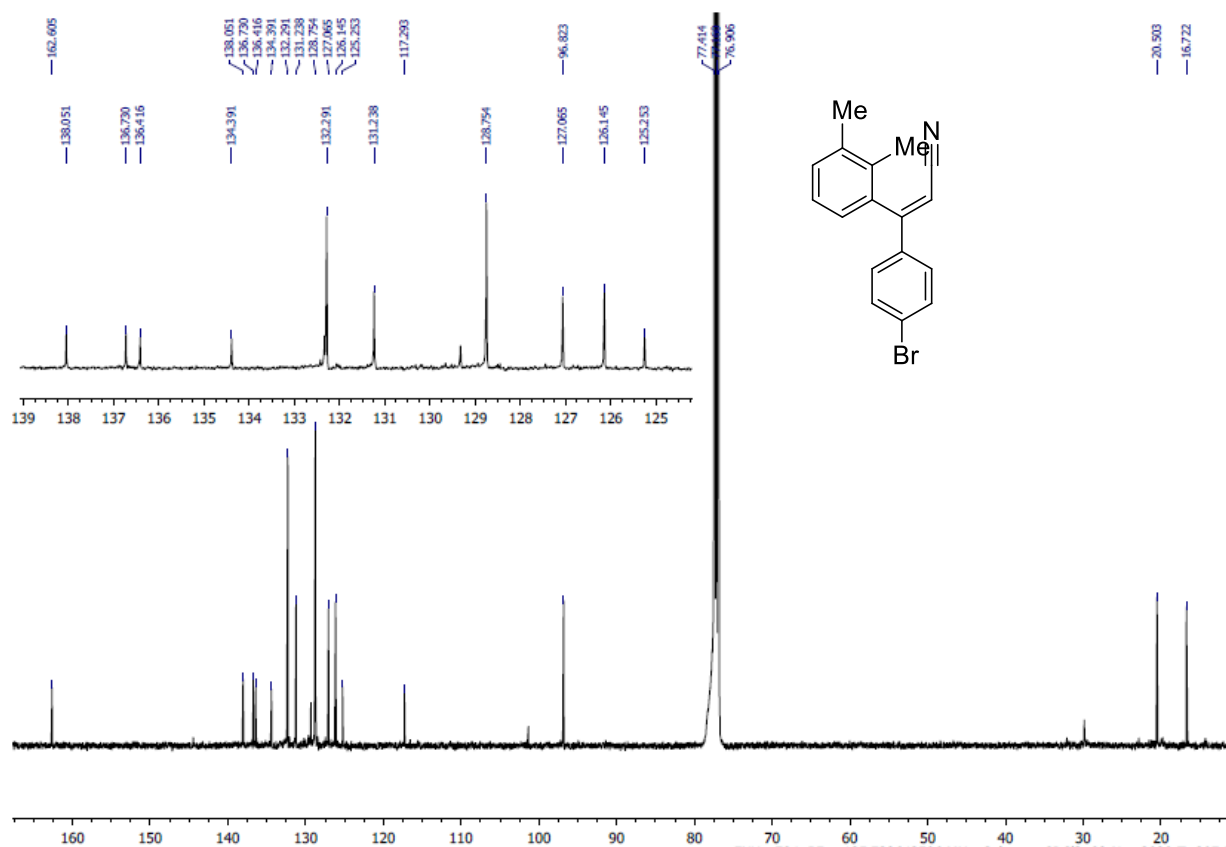

Figure S66. <sup>13</sup>C NMR spectrum of compound **2m** (CDCl<sub>3</sub>, 100 MHz).

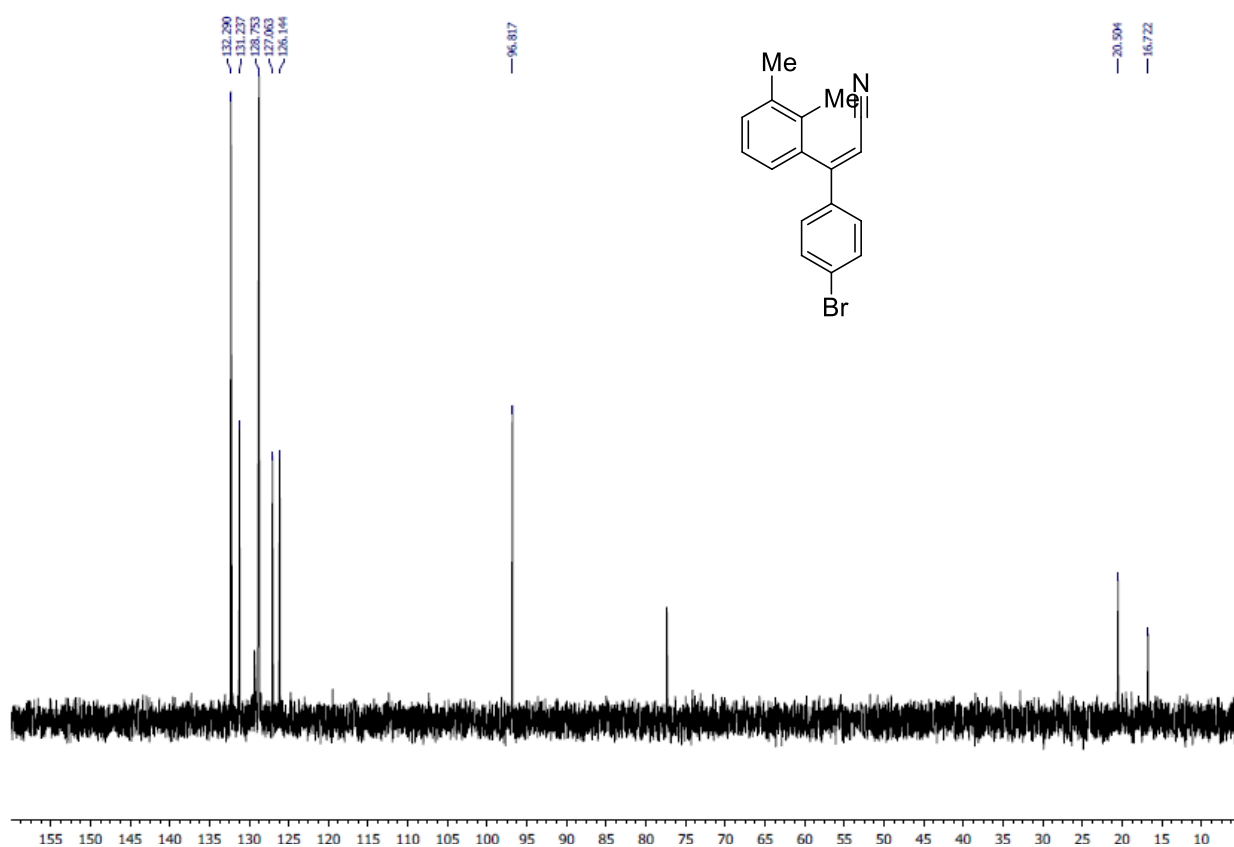

Figure S67. DEPT<sup>135</sup> NMR spectrum of compound **2m** (CDCl<sub>3</sub>, 400 MHz).

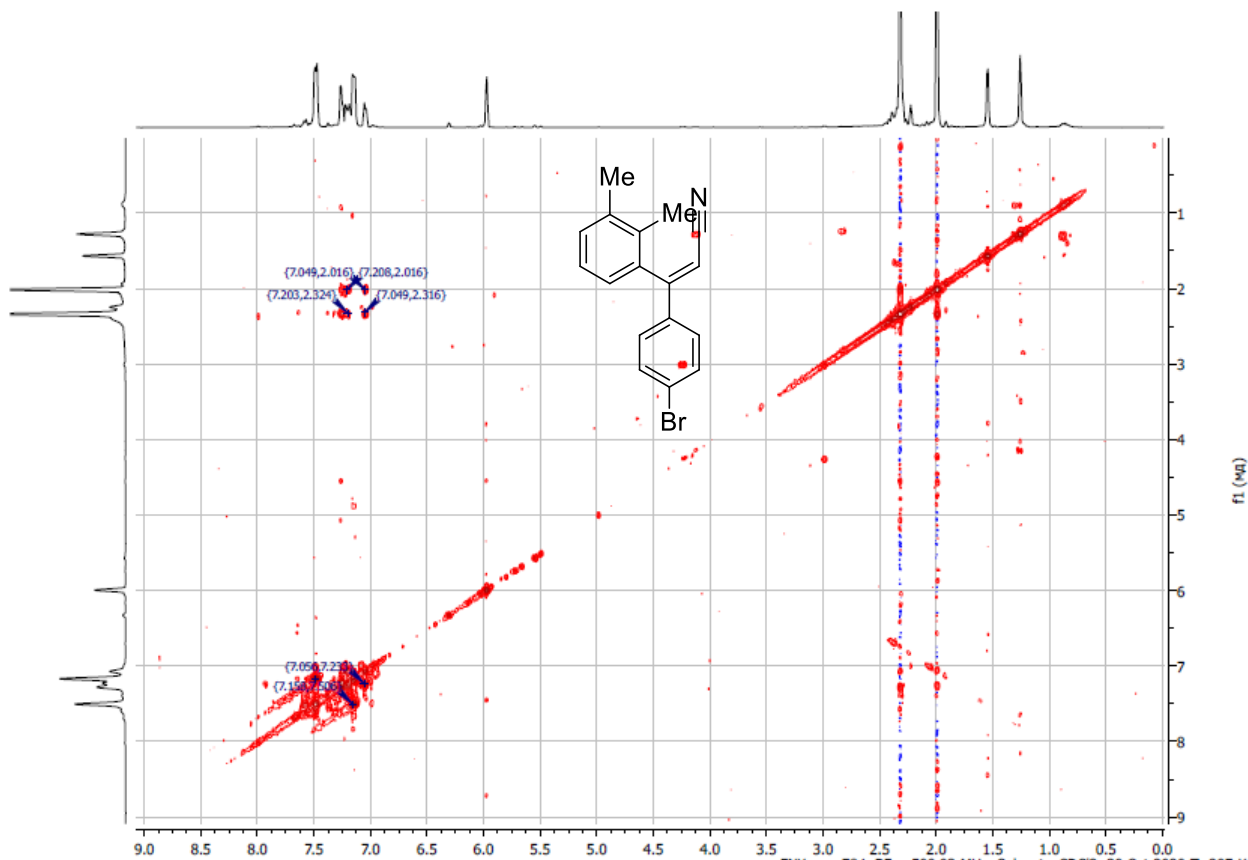

Figure S68. COSY NMR spectrum of compound **2m** (CDCl<sub>3</sub>, 400 MHz).

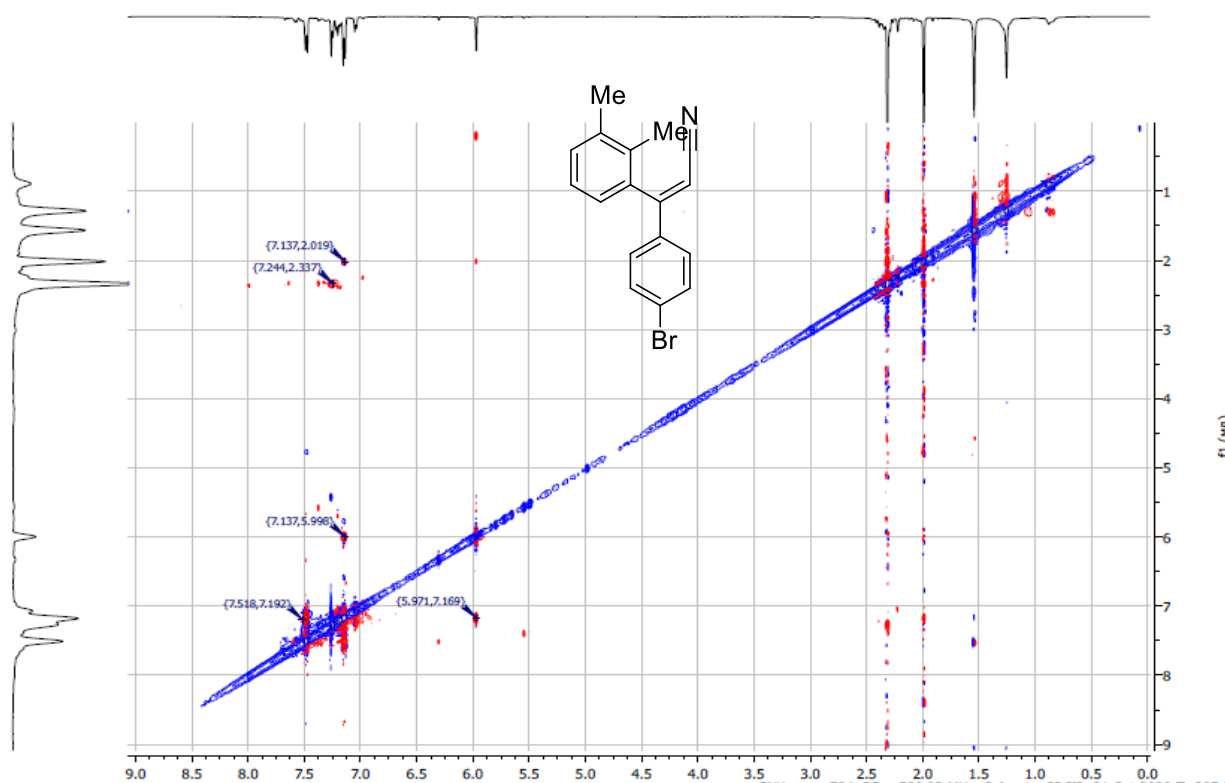

Figure S69. NOESY NMR spectrum of compound **2m** (CDCl<sub>3</sub>, 400 MHz).

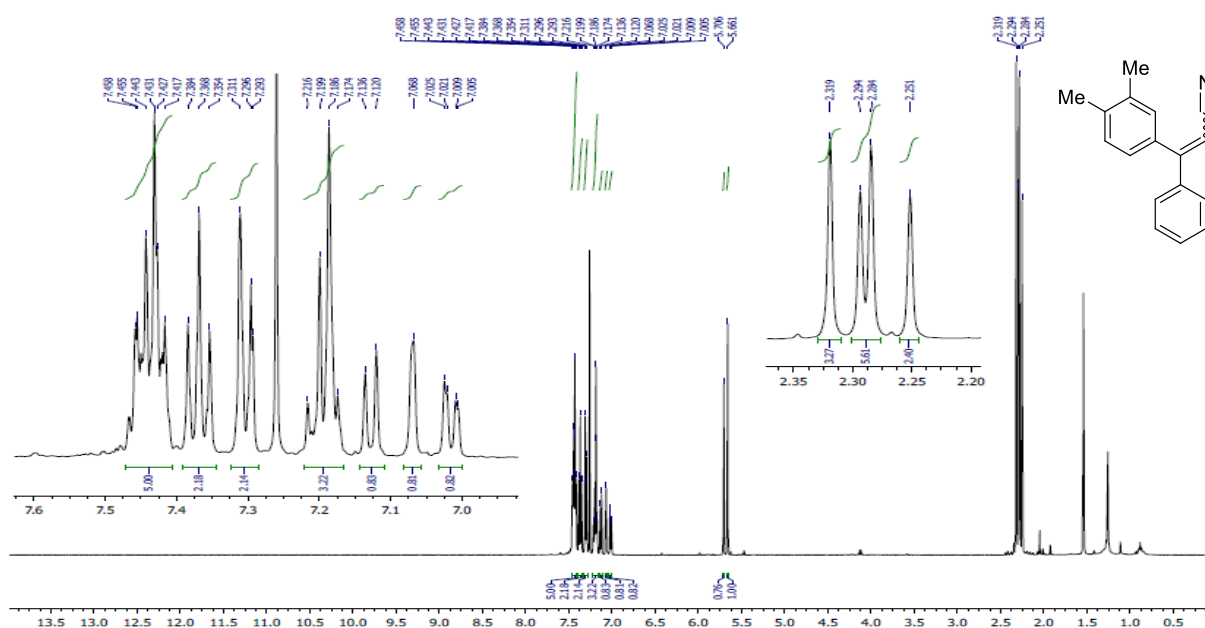

Figure S70. <sup>1</sup>H NMR spectrum of mixture of compounds *E,Z*-**2n** (CDCl<sub>3</sub>, 400 MHz).

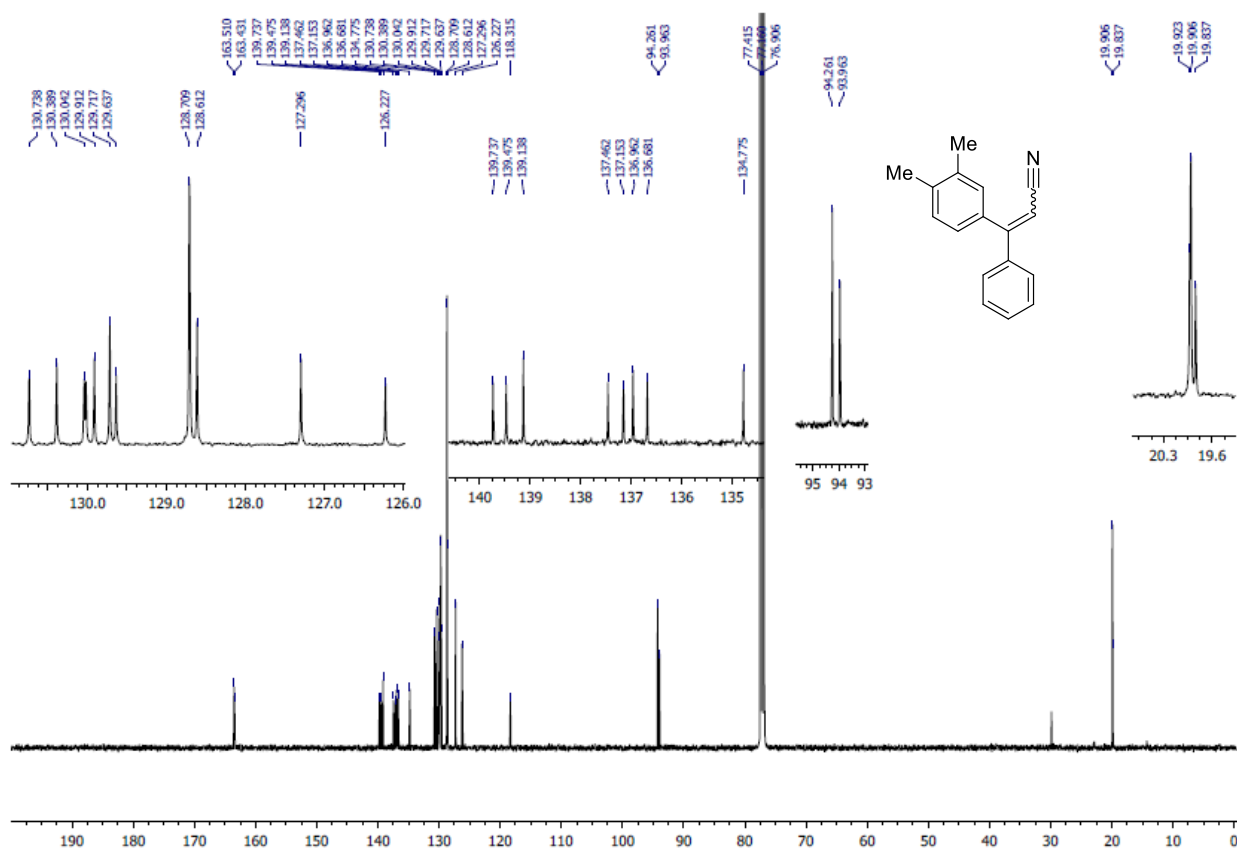

Figure S71.  $^{13}\text{C}$  NMR spectrum of mixture of compounds *E,Z*-**2n** ( $\text{CDCl}_3$ , 100 MHz).

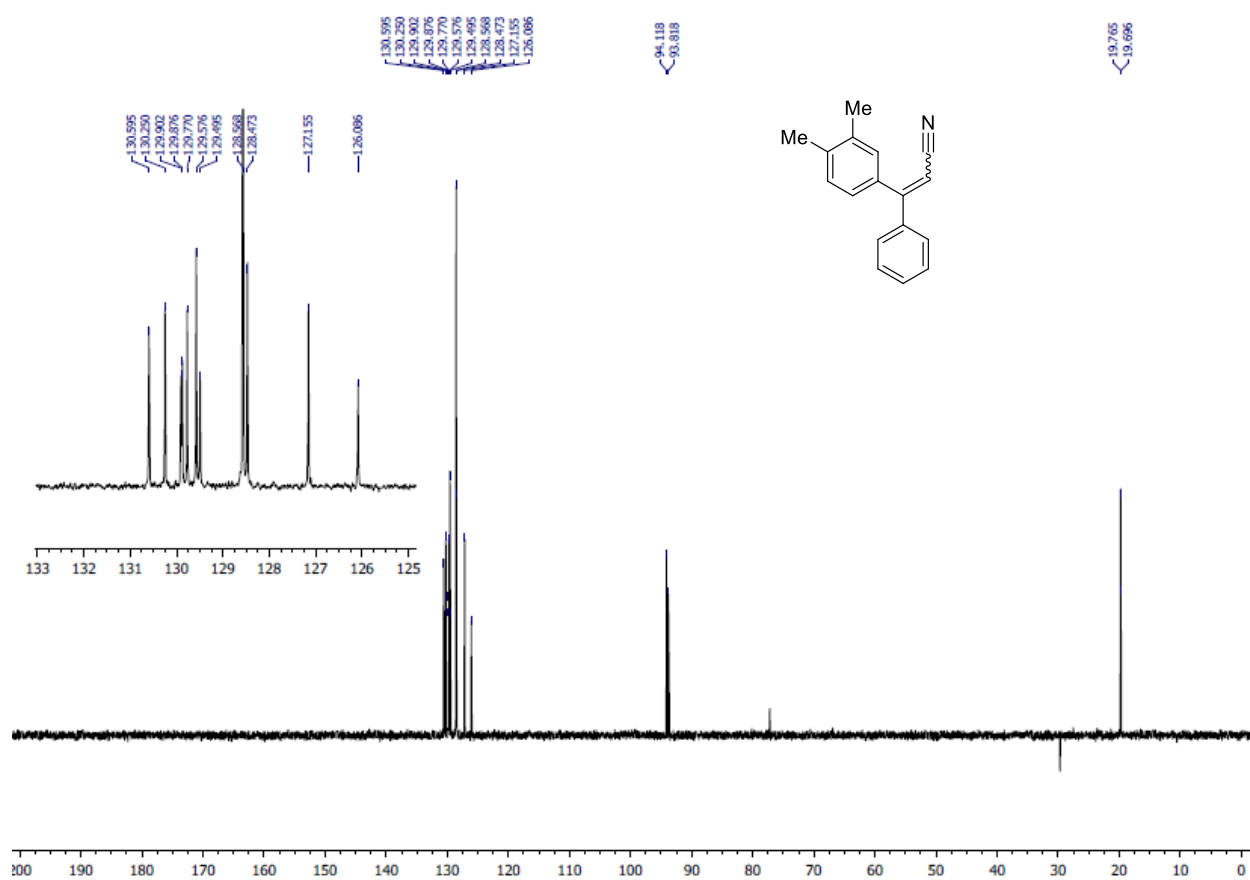

Figure S72. DEPT $^{135}$  NMR spectrum of mixture of compounds *E,Z*-**2n** ( $\text{CDCl}_3$ , 400 MHz).

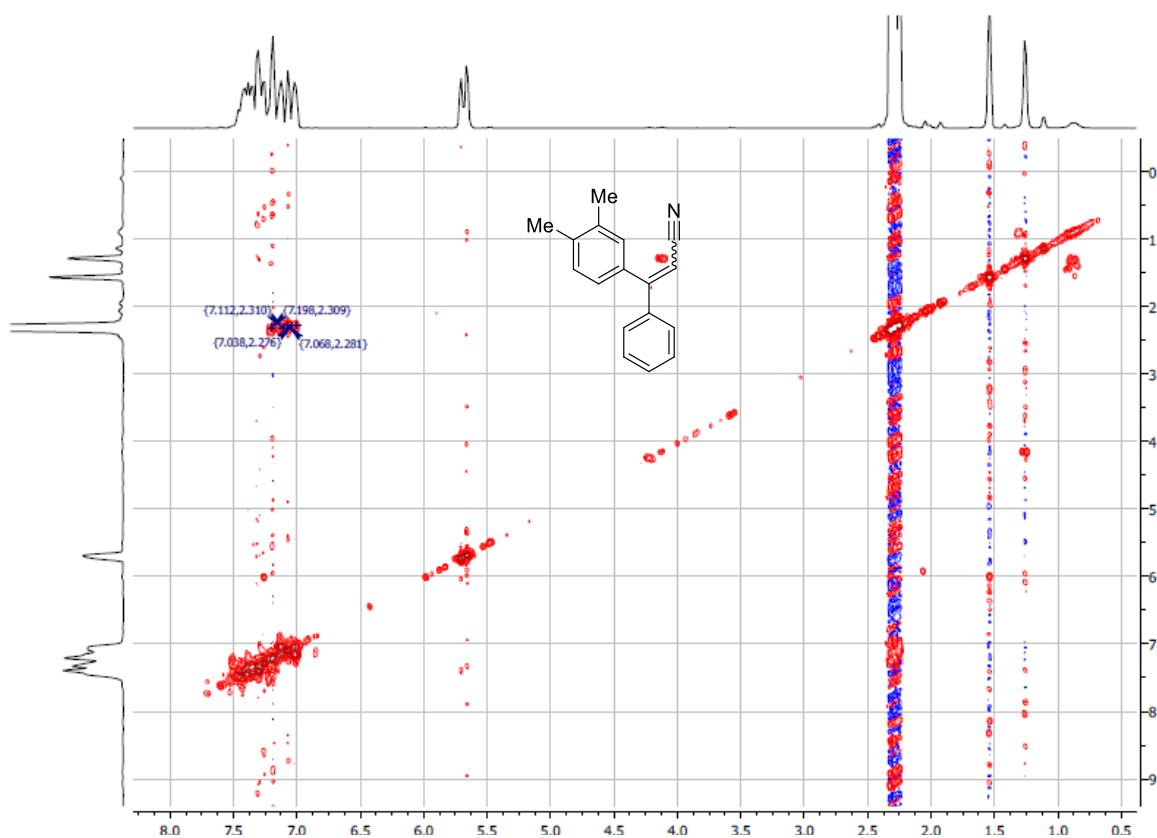

Figure S73. COSY NMR spectrum of mixture of compounds *E,Z*-**2n** (CDCl<sub>3</sub>, 400 MHz).

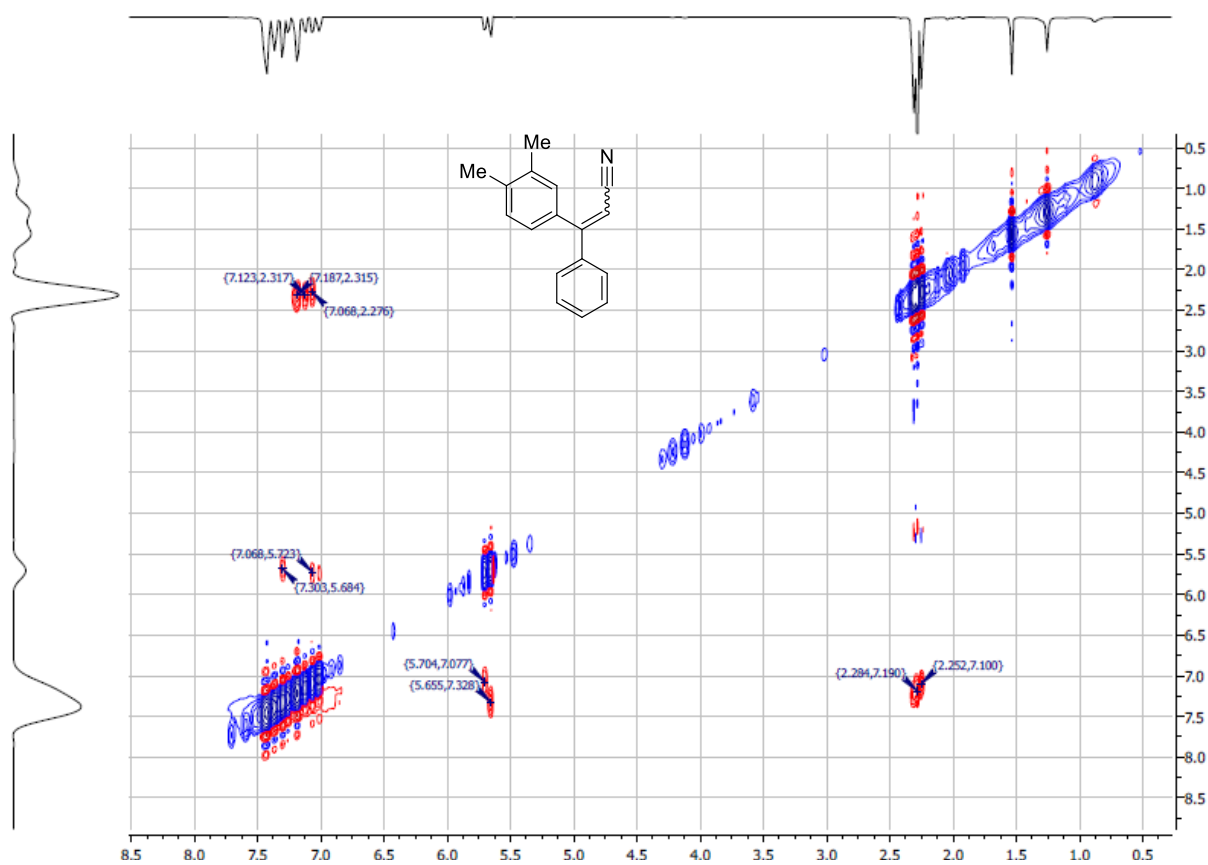

Figure S74. NOESY NMR spectrum of mixture of compounds *E,Z*-**2n** (CDCl<sub>3</sub>, 400 MHz).

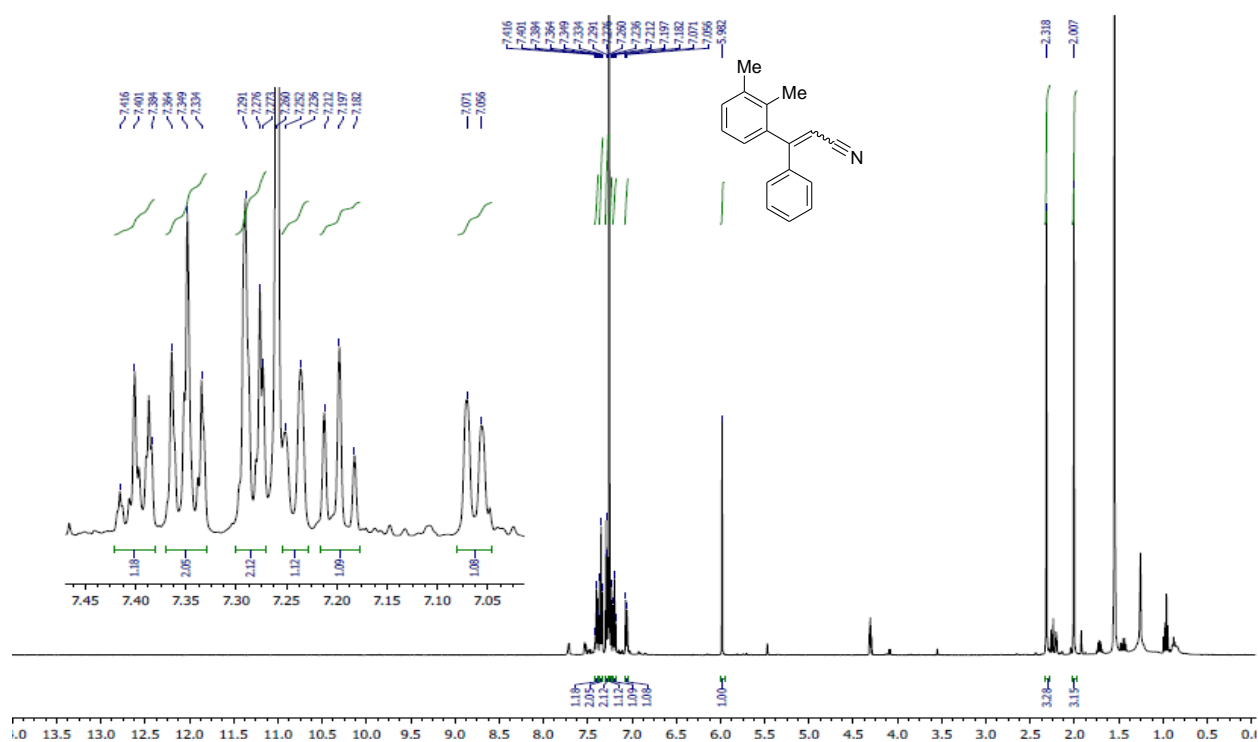

Figure S75. <sup>1</sup>H NMR spectrum of compound **2o** (CDCl<sub>3</sub>, 400 MHz).

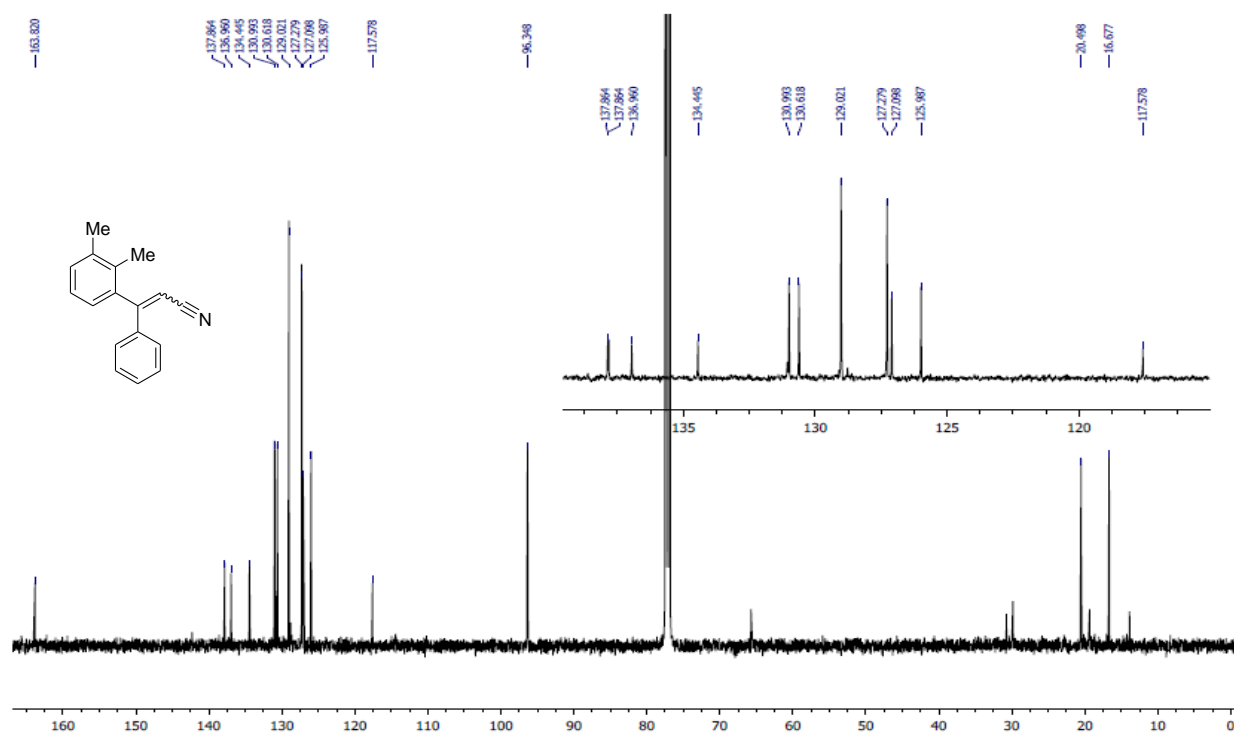

Figure S76. <sup>13</sup>C NMR spectrum of compound **2o** (CDCl<sub>3</sub>, 100 MHz).



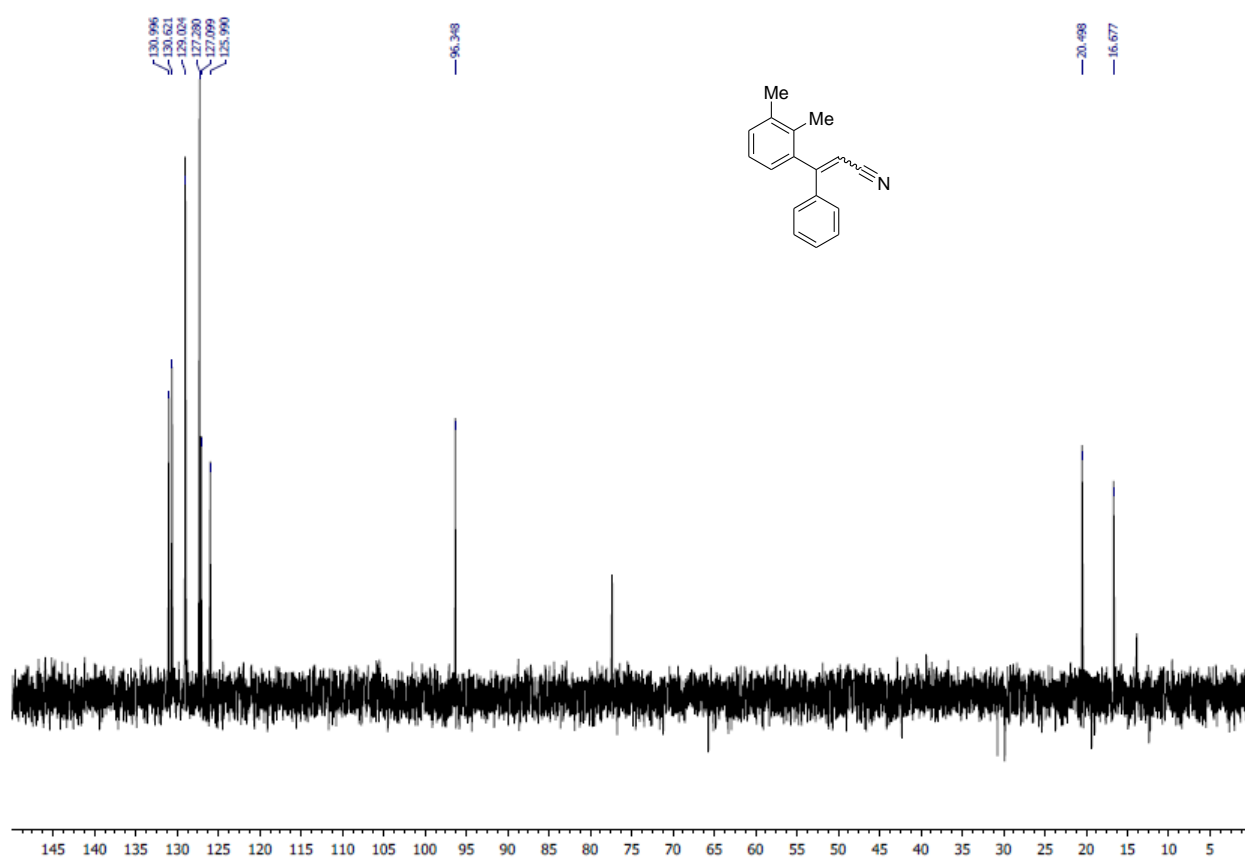

Figure S77. DEPT<sup>135</sup> NMR spectrum of compound **2o** (CDCl<sub>3</sub>, 400 MHz).

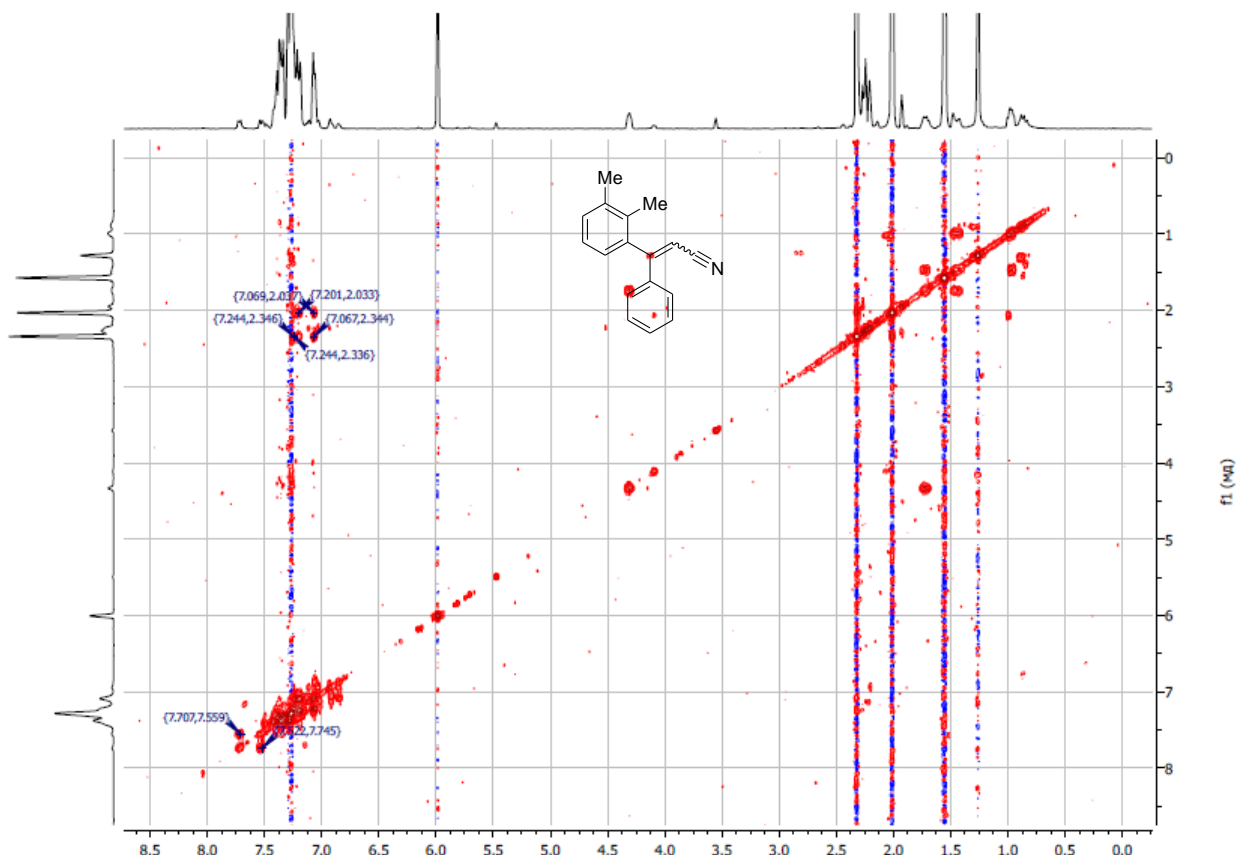

Figure S78. COSY NMR spectrum of compound **2o** (CDCl<sub>3</sub>, 400 MHz).

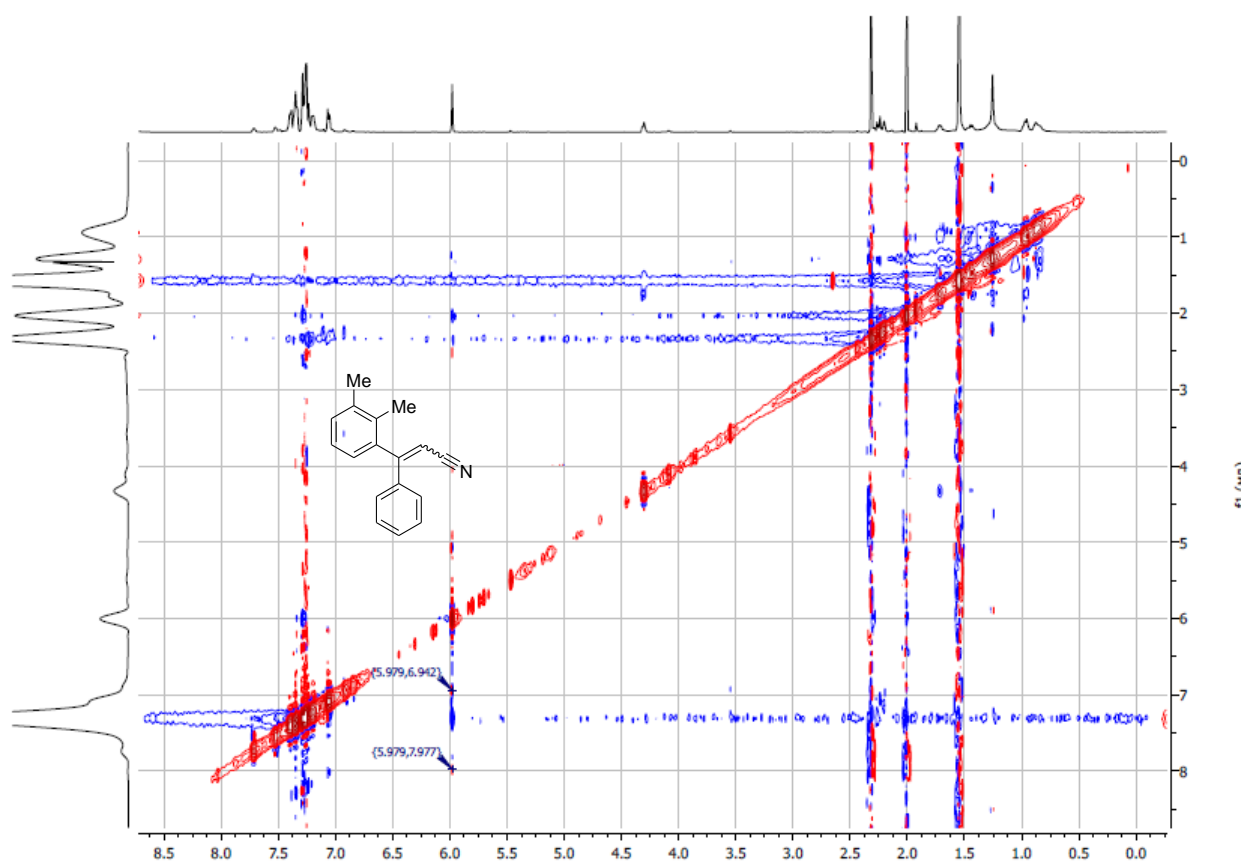

Figure S79. NOESY NMR spectrum of compound **2o** (CDCl<sub>3</sub>, 400 MHz).

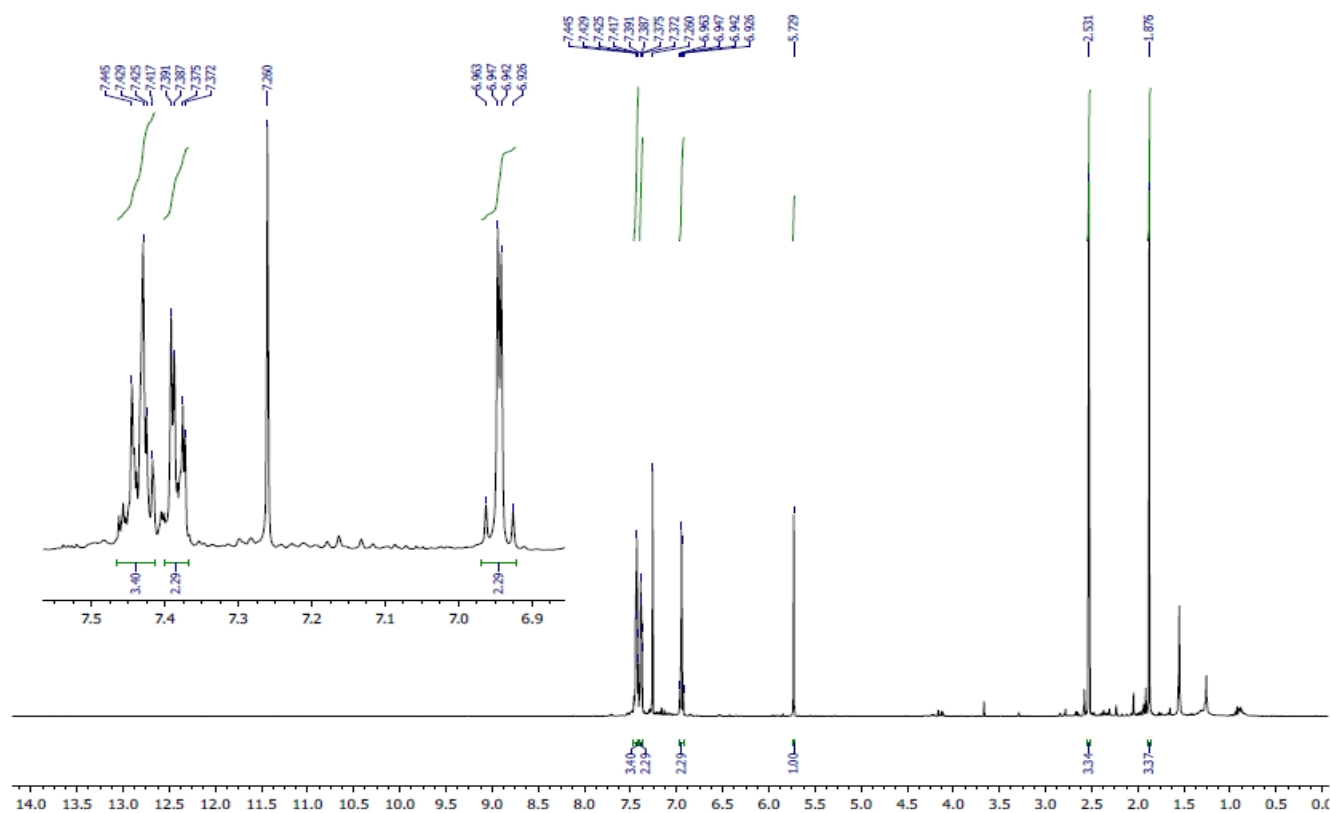

Figure S80. <sup>1</sup>H NMR spectrum of compound **3a** (CDCl<sub>3</sub>, 400 MHz).

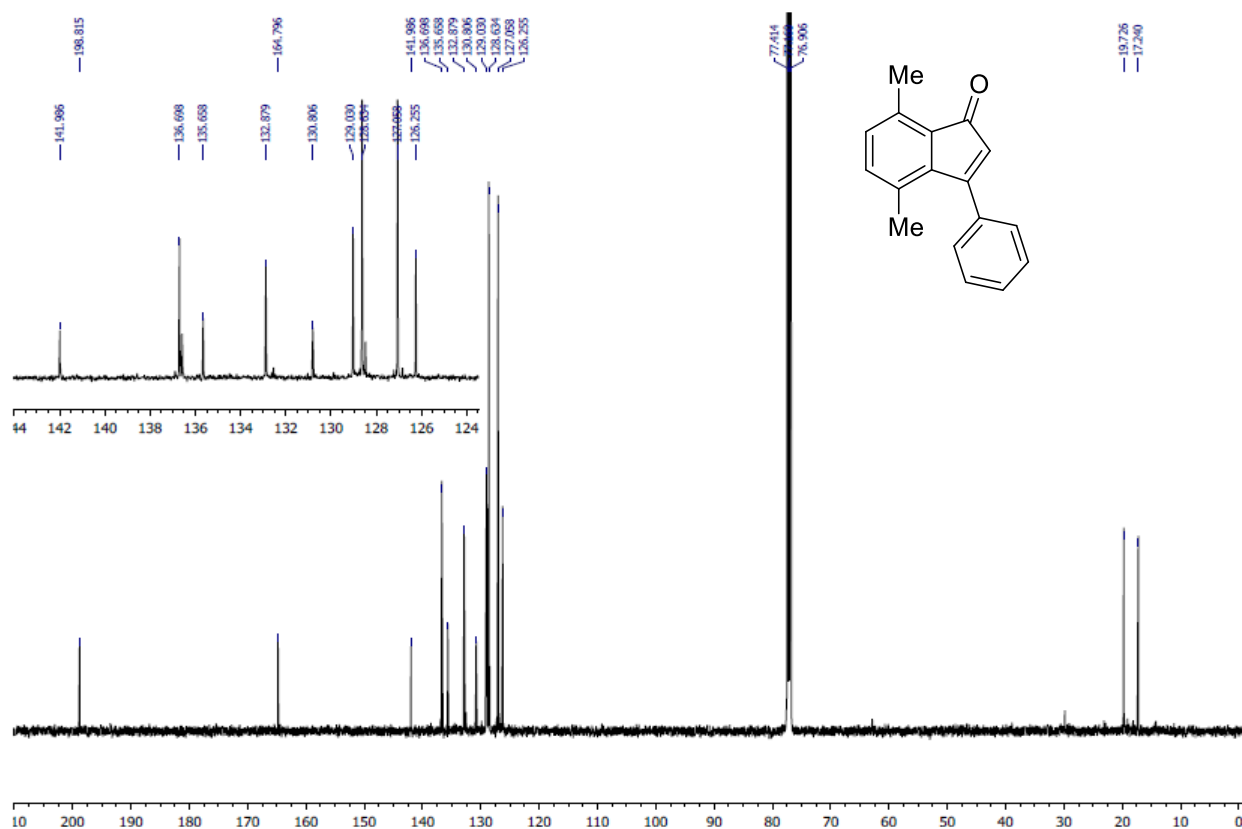

Figure S81. <sup>13</sup>C NMR spectrum of compound **3a** (CDCl<sub>3</sub>, 100 MHz).

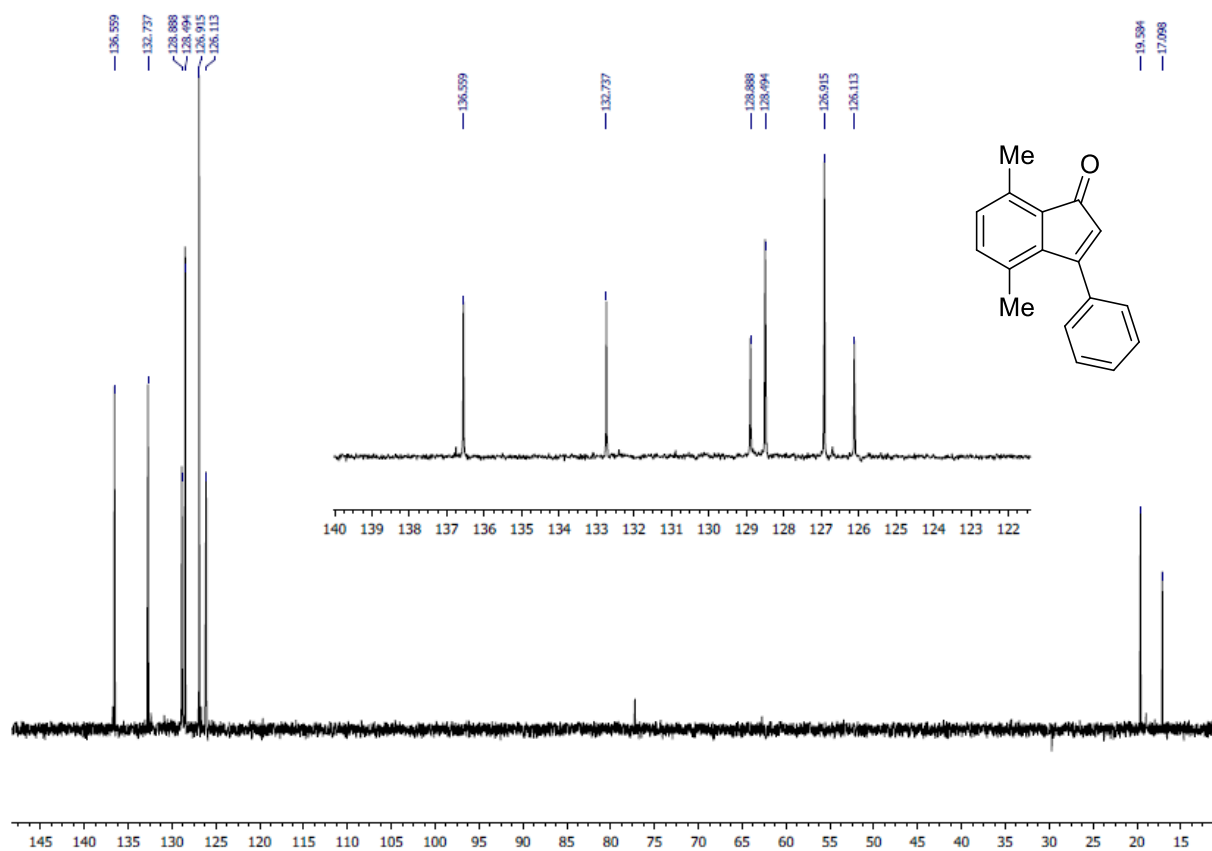

Figure S82. DEPT<sup>135</sup> NMR spectrum of compound **3a** (CDCl<sub>3</sub>, 400 MHz).

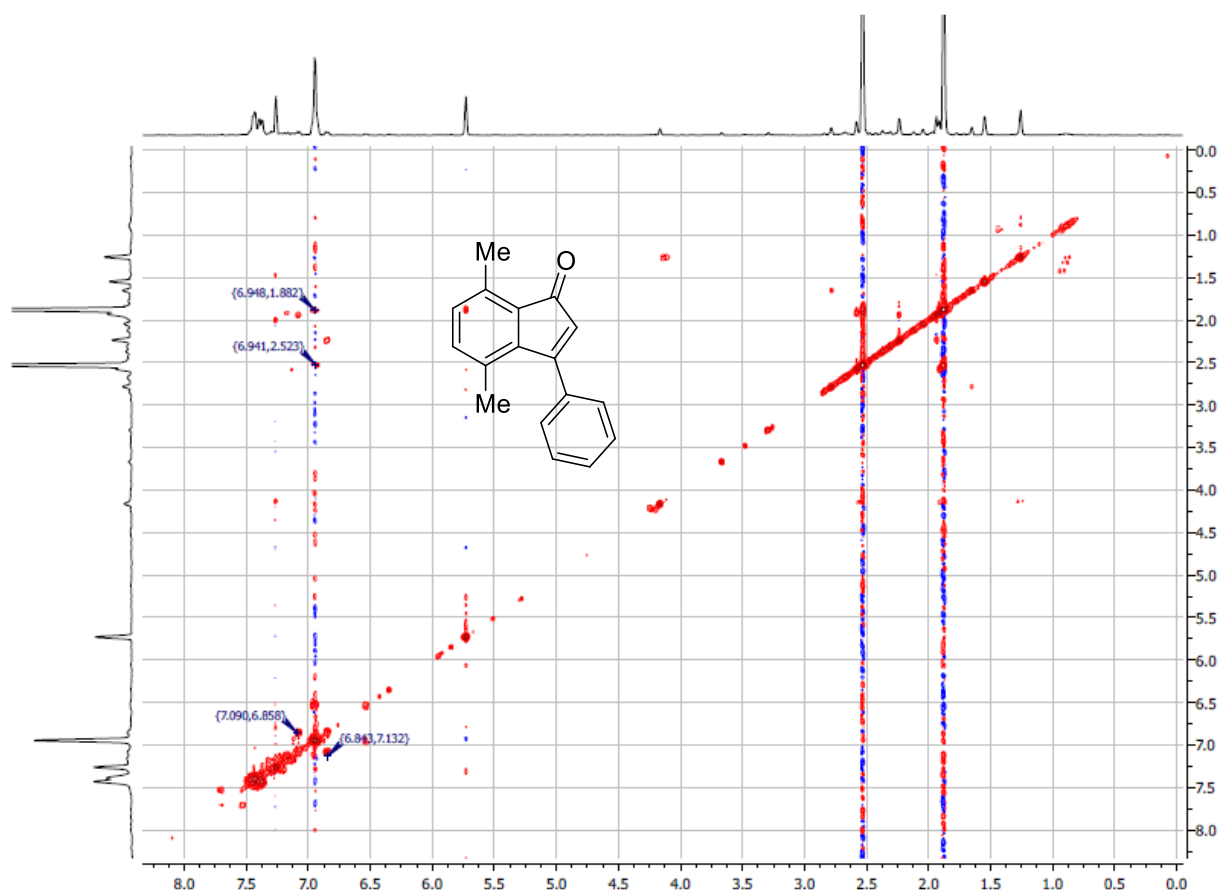

Figure S83. COSY NMR spectrum of compound **3a** (CDCl<sub>3</sub>, 400 MHz).

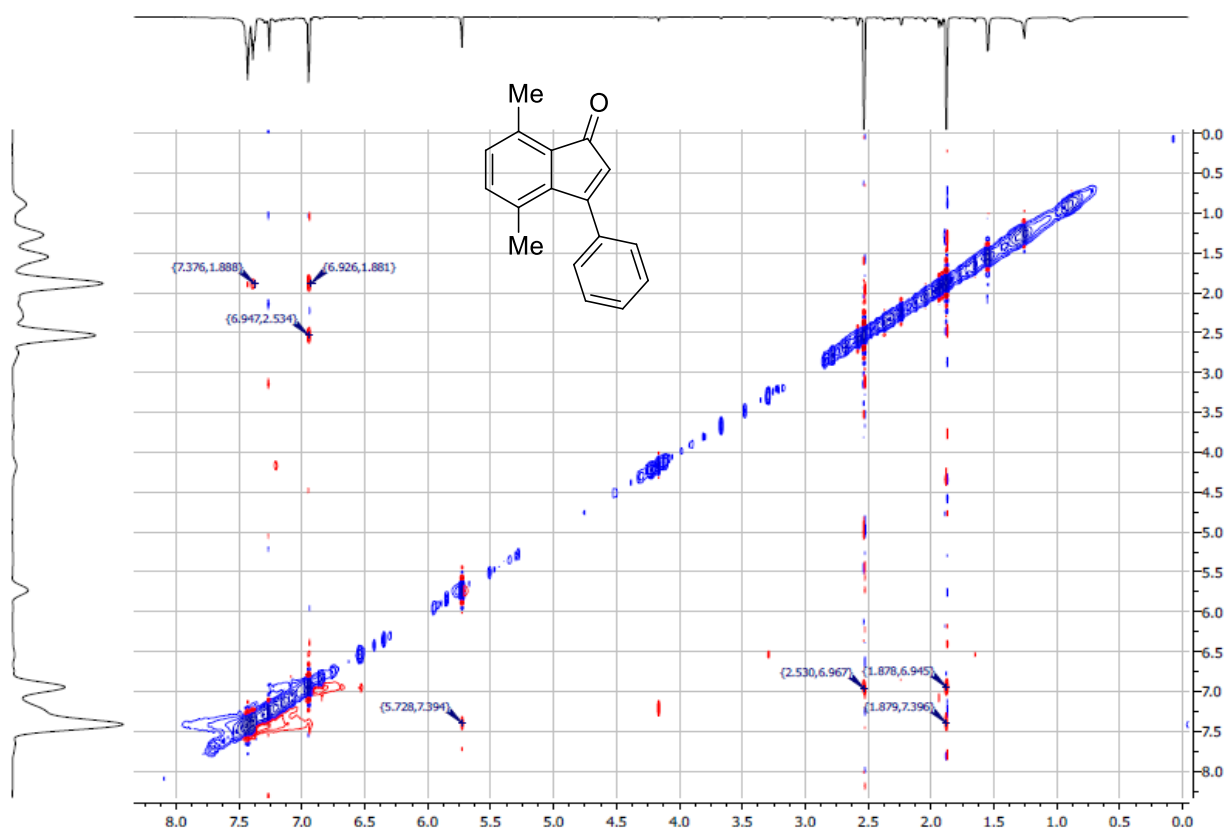

Figure S84. NOESY NMR spectrum of compound **3a** (CDCl<sub>3</sub>, 400 MHz).

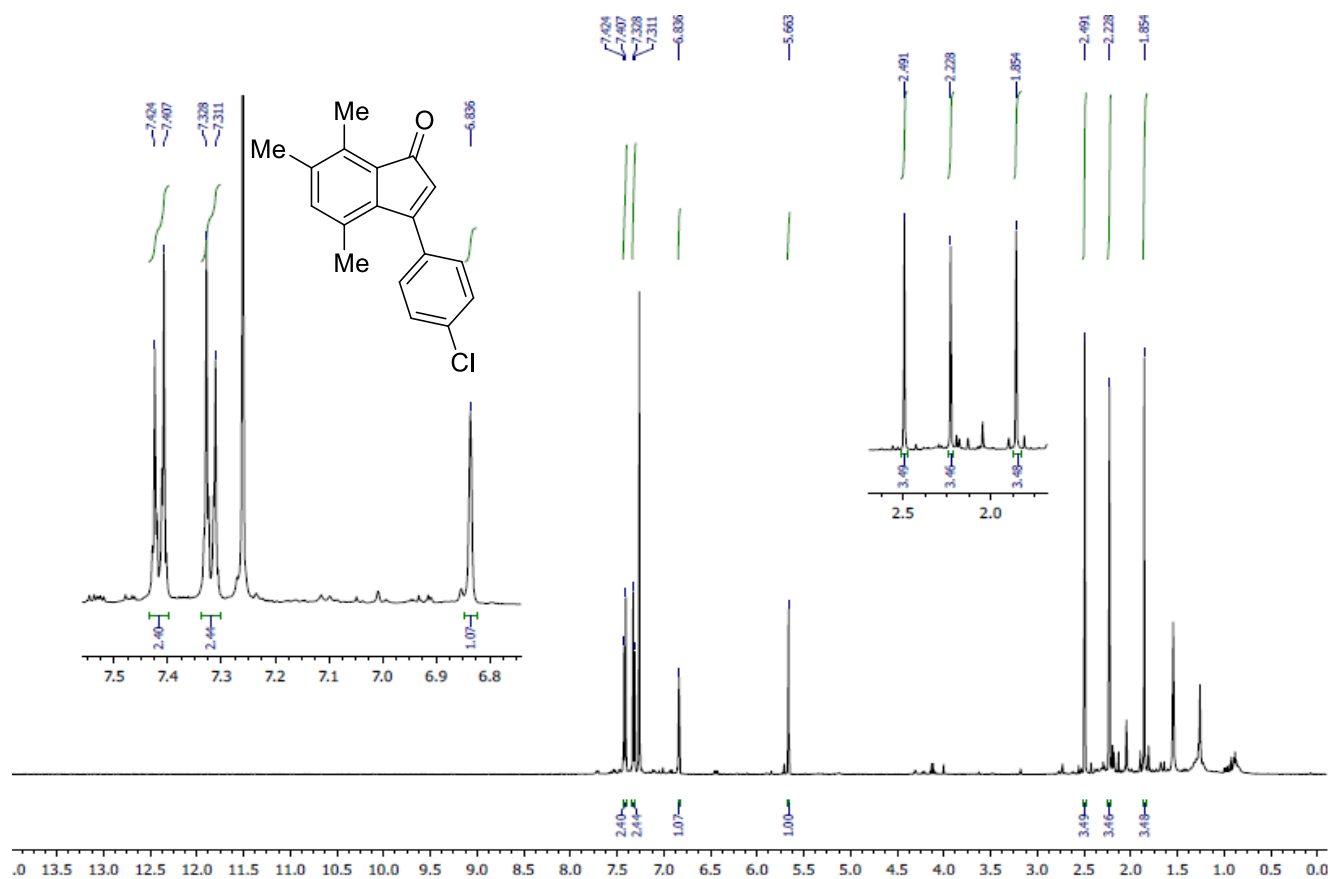

Figure S85. <sup>1</sup>H NMR spectrum of compound **3b** (CDCl<sub>3</sub>, 400 MHz).

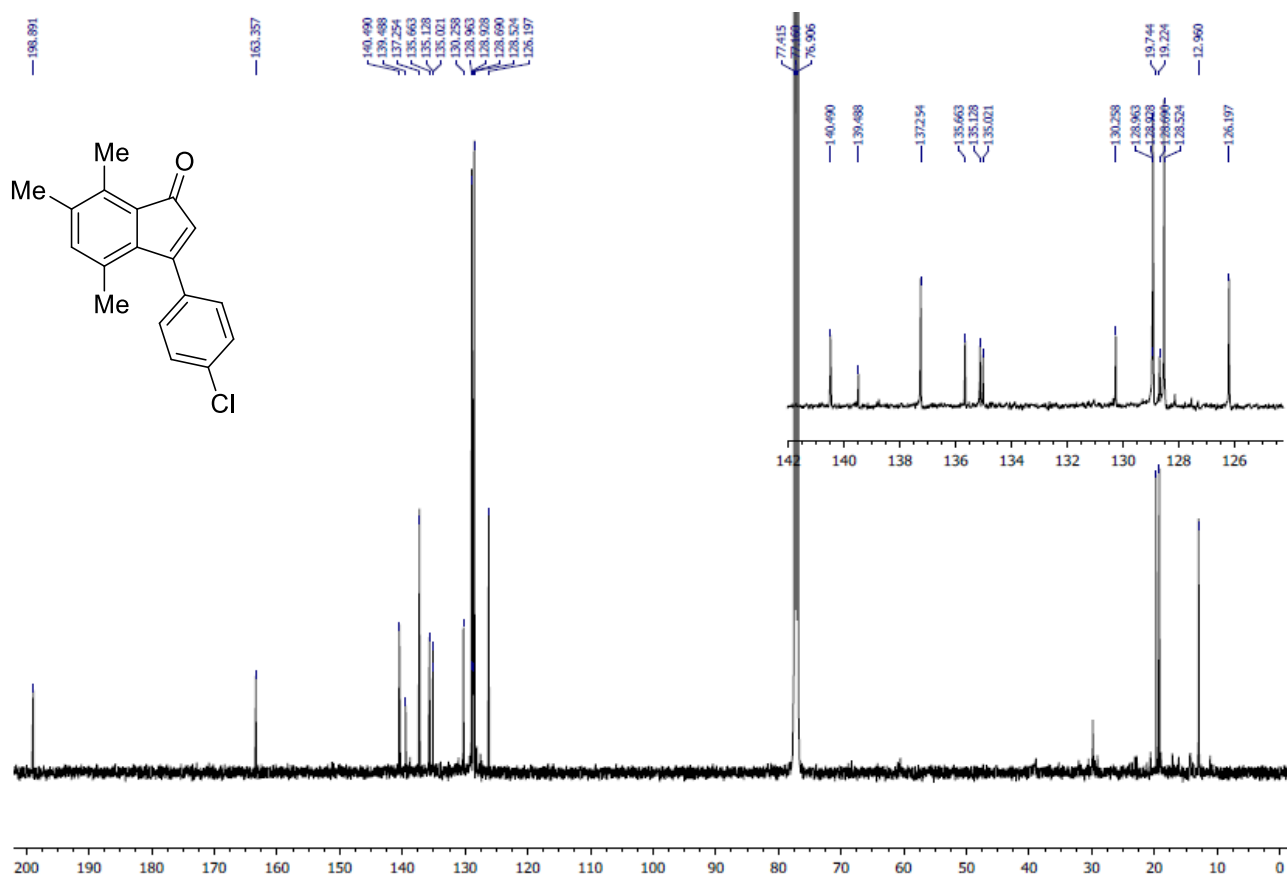

Figure S86. <sup>13</sup>C NMR spectrum of compound **3b** (CDCl<sub>3</sub>, 100 MHz).

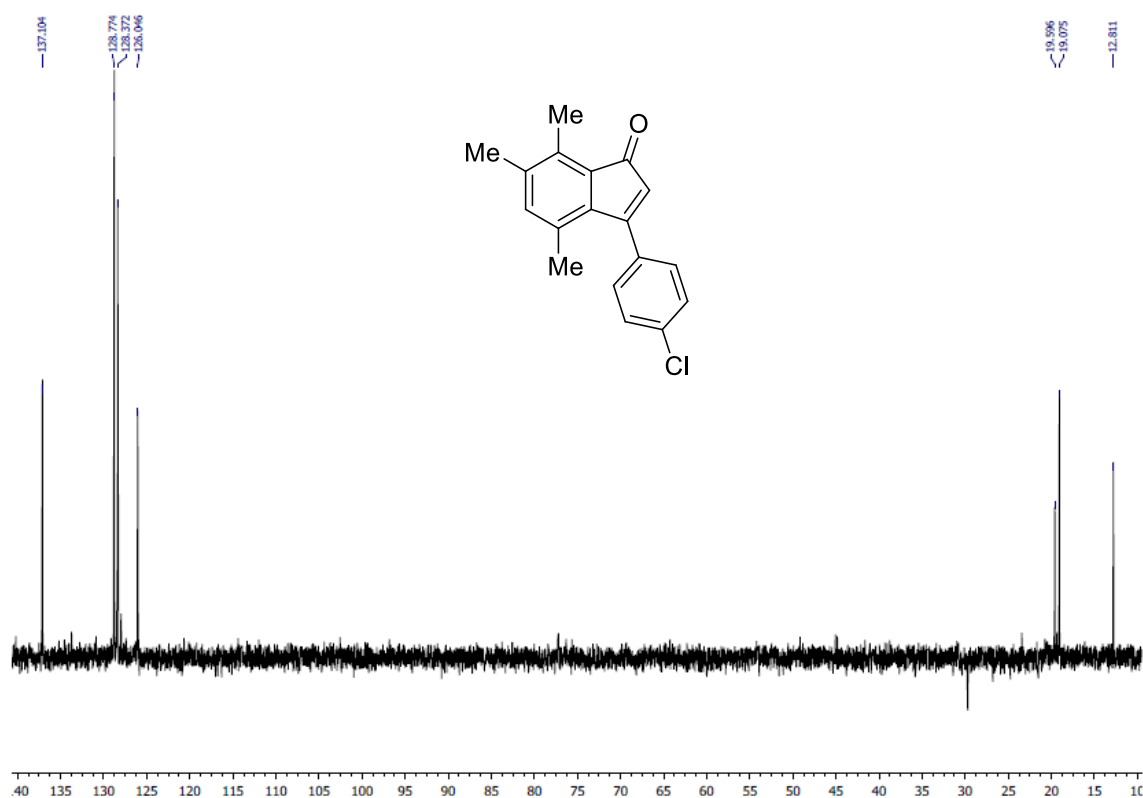

Figure S87. DEPT<sup>135</sup> NMR spectrum of compound **3b** (CDCl<sub>3</sub>, 400 MHz).

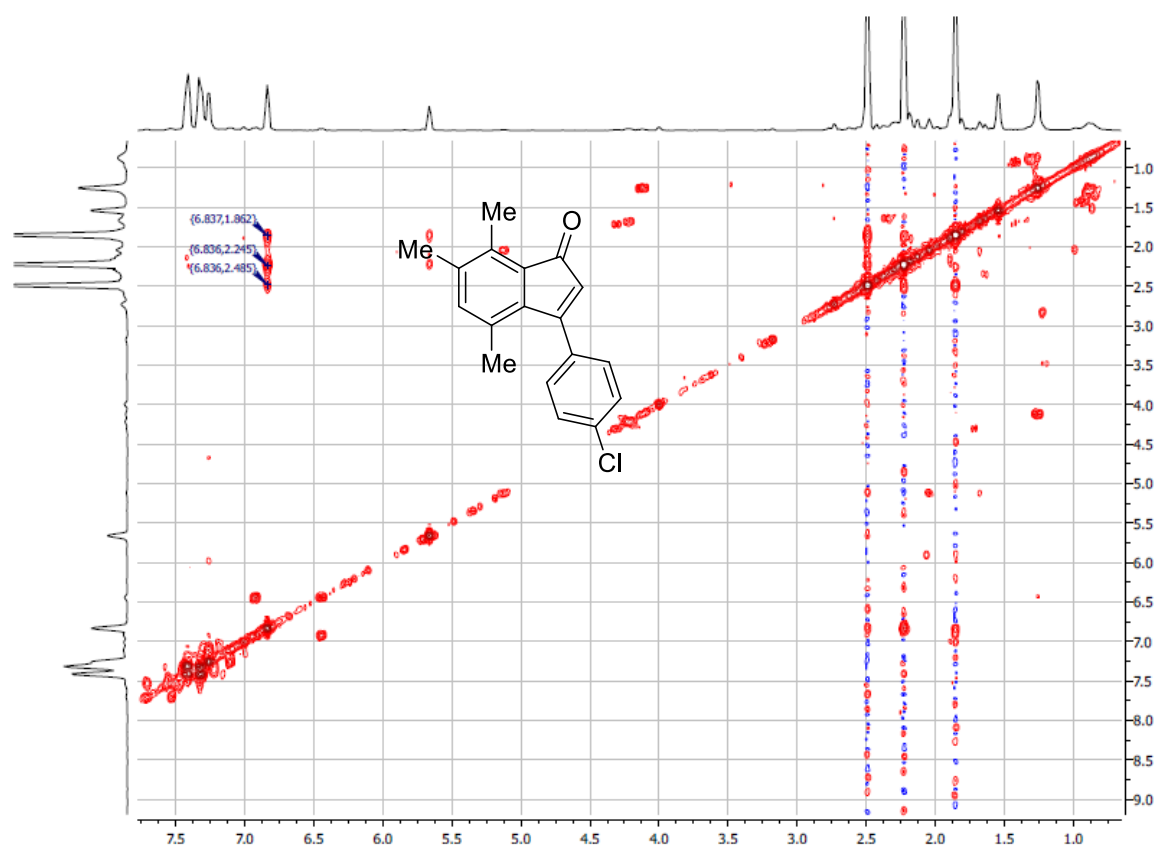

Figure S88. COSY NMR spectrum of compound **3b** (CDCl<sub>3</sub>, 400 MHz).

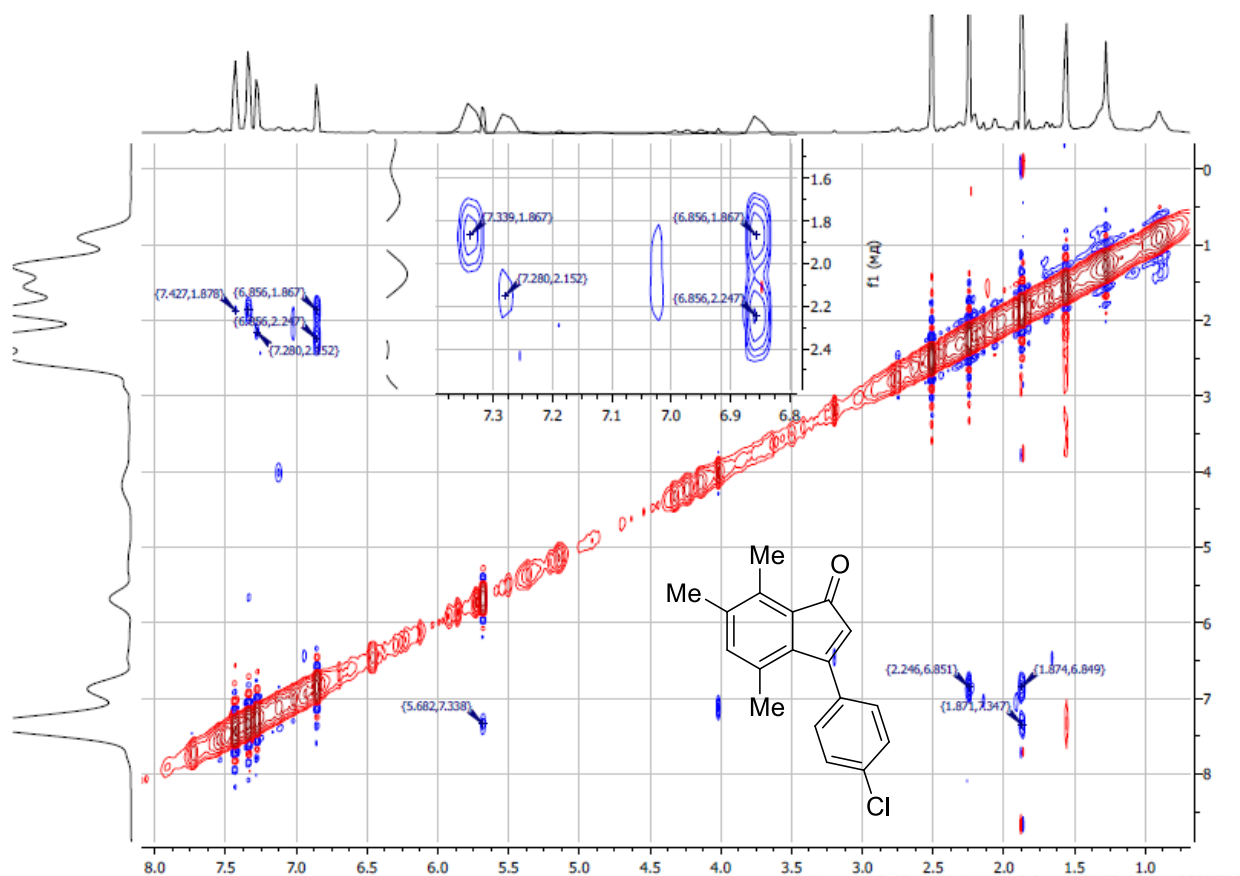

Figure S89. NOESY NMR spectrum of compound **3b** (CDCl<sub>3</sub>, 400 MHz).
